# Supplementary material for: Genetic modulation of omega-3 and omega-6 polyunsaturated fatty acid metabolism and health outcomes: a systematic review
Source: Royal Society of Chemistry journal article supplement (doi:10.1039/d5fo04964d), 2026-01-01
Supplement: d5fo04964d3.xlsx [file d5fo04964d3.xlsx]

## Sheet: Sheet1
Classification basis	Tier	Design	N	Genes	PUFA	Reference
Large sample (N=8840) with adequate power	1	Cross-sectional	8840	5-SNP PRS	n-3	K. S. Kim and S. Park, Impact of Lung-Related Polygenic Risk Scores on Chronic Obstructive Pulmonary Disease Risk and Their Interaction with w-3 Fatty Acid Intake in Middle-Aged and Elderly Individuals, Nutrients, 2023, 15.
RCT providing causal evidence	1	RCT	92	ABCA1, ABCG5, LDLR, MTTP, NPC1L1, PPARA	n-3	E. Rajendiran, B. Lamarche, Y. She, V. Ramprasath, P. Eck, D. Brassard, I. Gigleux, E. Levy, A. Tremblay, P. Couture, J. D. House, P. J. H. Jones and C. Desmarchelier, A combination of single nucleotide polymorphisms is associated with the interindividual variability in the blood lipid response to dietary fatty acid consumption in a randomized clinical trial, Am J Clin Nutr, 2021, 114, 564-577.
RCT providing causal evidence	1	RCT	381	ADIPOQ	Both (n-3 & n-6)	R. Aller, O. Izaola, D. Primo Martin, J. A. Martinez and D. de Luis Roman, Dietary intervention with 2 different fat profiles; role of the rs822393 variant in metabolic parameter changes, Nutr Hosp, 2023, 40, 49-58.
RCT providing causal evidence	1	RCT	367	ADIPOQ	Both (n-3 & n-6)	A. Alsaleh, D. Crepostnaia, Z. Maniou, F. J. Lewis, W. L. Hall, T. A. Sanders, S. D. O'Dell and M. s. team, Adiponectin gene variant interacts with fish oil supplementation to influence serum adiponectin in older individuals, J Nutr, 2013, 143, 1021-1027.
RCT providing causal evidence	1	RCT	98	ALOX5	n-3 predominant	C. B. Stephensen, P. Armstrong, J. W. Newman, T. L. Pedersen, J. Legault, G. U. Schuster, D. Kelley, S. Vikman, J. Hartiala, R. Nassir, M. F. Seldin and H. Allayee, ALOX5 gene variants affect eicosanoid production and response to fish oil supplementation, J Lipid Res, 2011, 52, 991-1003.
Exploratory/pilot observational design	1	RCT	98	ALOX5 promoter	n-3 predominant	P. Armstrong, D. S. Kelley, J. W. Newman, F. E. Staggers, Sr., J. Hartiala, H. Allayee and C. B. Stephensen, Arachidonate 5-lipoxygenase gene variants affect response to fish oil supplementation by healthy African Americans, J Nutr, 2012, 142, 1417-1428.
Single-arm design; no control group	2	Single-arm intervention	362	APOA5	n-3	D. de Luis, O. Izaola and D. Primo, APOA-5 genetic variant and a hypocaloric diet enriched in omega-6 fatty acids with Mediterranean pattern, Eur Rev Med Pharmacol Sci, 2024, 28, 2014-2023.
Large sample (N=464) with adequate power	1	Cross-sectional	464	APOC3	Both (n-3 & n-6)	R. Yamamoto, Y. Takeshita, H. Tsujiguchi, T. Kannon, T. Sato, K. Hosomichi, K. Suzuki, Y. Kita, T. Tanaka, H. Goto, Y. Nakano, T. Yamashita, S. Kaneko, A. Tajima, H. Nakamura and T. Takamura, Nutrigenetic Interaction Between Apolipoprotein C3 Polymorphism and Fat Intake in People with Nonalcoholic Fatty Liver Disease, Curr Dev Nutr, 2023, 7, 100051.
Large sample (N=848) with adequate power	1	Cross-sectional	848	APOC3	n-3 predominant	O. Olivieri, N. Martinelli, M. Sandri, A. Bassi, P. Guarini, E. Trabetti, F. Pizzolo, D. Girelli, S. Friso, P. F. Pignatti and R. Corrocher, Apolipoprotein C-III, n-3 polyunsaturated fatty acids, and "insulin-resistant" T-455C APOC3 gene polymorphism in heart disease patients: example of gene-diet interaction, Clin Chem, 2005, 51, 360-367.
Small sample (N=34); supporting evidence	2	Cross-sectional	34	APOC3	Both (n-3 & n-6)	Q. Y. Xu, H. Li, H. X. Cao, Q. Pan and J. G. Fan, APOC3 rs2070667 Associates with Serum Triglyceride Profile and Hepatic Inflammation in Nonalcoholic Fatty Liver Disease, Biomed Res Int, 2020, 2020, 8869674.
Large sample (N=136701) with adequate power	1	Cross-sectional	136701	APOE	Both (n-3 & n-6)	W. S. Harris, J. V. Pottala, D. L. Thiselton, A. V. S, A. M. Baedke, T. D. Dayspring, G. R. Warnick and J. P. McConnell, Does APOE genotype modify the relations between serum lipid and erythrocyte omega-3 fatty acid levels?, J Cardiovasc Transl Res, 2014, 7, 526-532.
RCT providing causal evidence	1	RCT	38	APOE	n-3 predominant	E. Olano-Martin, E. Anil, M. J. Caslake, C. J. Packard, D. Bedford, G. Stewart, D. Peiris, C. M. Williams and A. M. Minihane, Contribution of apolipoprotein E genotype and docosahexaenoic acid to the LDL-cholesterol response to fish oil, Atherosclerosis, 2010, 209, 104-110.
Prospective cohort with temporal data	1	Cohort	215083	APOE	n-3	X. Liu, P. Zhuang, Y. Li, F. Wu, X. Wan, Y. Zhang and J. Jiao, Association of fish oil supplementation with risk of incident dementia: A prospective study of 215,083 older adults, Clin Nutr, 2022, 41, 589-598.
Prospective cohort with temporal data	1	Cohort	445961	APOE	n-3	H. Ma, T. Zhou, X. Li, Y. Heianza and L. Qi, Use of fish oil supplements is differently related to incidence of all-cause and vascular dementia among people with the distinct APOE epsilon4 dosage, Clin Nutr, 2022, 41, 731-736.
Prospective cohort with temporal data	1	Cohort	336	APOE	Both (n-3 & n-6)	X. Liu, T. Beck, K. Dhana, C. C. Tangney, P. Desai, K. Krueger, D. A. Evans and K. B. Rajan, Dietary fats and the APOE-e4 risk allele in relation to cognitive decline: a longitudinal investigation in a biracial population sample, J Nutr Health Aging, 2024, 28, 100211.
Prospective cohort with temporal data	1	Cohort	1228	APOE	n-3	C. Samieri, C. Feart, C. Proust-Lima, E. Peuchant, J. F. Dartigues, H. Amieva and P. Barberger-Gateau, omega-3 fatty acids and cognitive decline: modulation by ApoEepsilon4 allele and depression, Neurobiol Aging, 2011, 32, 2317 e2313-2322.
RCT providing causal evidence	1	RCT	584	APOE	Both (n-3 & n-6)	G. Sun, J. R. Davies, T. Mell, M. Harland, R. M. H. Saleh, A. D. Race, P. M. Loadman, E. A. Williams, A. M. Minihane and M. A. Hull, APOE genotype, eicosapentaenoic acid (EPA) supplementation and n-3 highly unsaturated fatty acid (HUFA) levels in patients with multiple colorectal polyps: A secondary analysis of the seAFOod polyp prevention trial, Prostaglandins Leukot Essent Fatty Acids, 2024, 20…
RCT providing causal evidence	1	RCT	189	APOE	n-3	I. Loukil, E. C. Aguilera, A. Vachon, P. Léveillé and M. Plourde, Sex, Body Mass Index, and APOE4 Increase Plasma Phospholipid–Eicosapentaenoic Acid Response During an ω-3 Fatty Acid Supplementation: A Secondary Analysis, The Journal of Nutrition, 2024, 154, 1561-1570.
Large sample (N=306) with adequate power	1	Cross-sectional	306	APOE	n-3	H. L. Fisk, M. Irvine, E. A. Miles, G. Lietz, J. C. Mathers, C. J. Packard, C. K. Armah, B. M. Kofler, P. J. Curtis, A. M. Minihane and P. C. Calder, Association of oily fish intake, sex, age, BMI and APOE genotype with plasma long-chain n-3 fatty acid composition, Br J Nutr, 2018, 120, 23-32.
Large sample (N=340) with adequate power	1	Cross-sectional	340	APOE	Both (n-3 & n-6)	A. Sala-Vila, E. M. Arenaza-Urquijo, G. Sanchez-Benavides, M. Suarez-Calvet, M. Mila-Aloma, O. Grau-Rivera, J. M. Gonzalez-de-Echavarri, M. Crous-Bou, C. Minguillon, K. Fauria, G. Operto, C. Falcon, G. Salvado, R. Cacciaglia, S. Ingala, F. Barkhof, H. Schroder, N. Scarmeas, J. D. Gispert, J. L. Molinuevo and A. study, DHA intake relates to better cerebrovascular and neurodegeneration neuroimaging…
RCT providing causal evidence	1	RCT	743	APOE	n-3 predominant	C. M. Vyas, J. H. Kang, D. Mischoulon, N. R. Cook, C. F. Reynolds Iii, G. Chang, S. Mora, I. De Vivo, J. E. Manson and O. I. Okereke, Apolipoprotein E and Its Association With Cognitive Change and Modification of Treatment Effects of Vitamin D3 and Omega-3s on Cognitive Change: Results From the In-Clinic Subset of a Randomized Clinical Trial, J Gerontol A Biol Sci Med Sci, 2024, 79.
RCT providing causal evidence	1	RCT	120	APOE	n-6 predominant	I. M. Shatwan, M. Weech, K. G. Jackson, J. A. Lovegrove and K. S. Vimaleswaran, Apolipoprotein E gene polymorphism modifies fasting total cholesterol concentrations in response to replacement of dietary saturated with monounsaturated fatty acids in adults at moderate cardiovascular disease risk, Lipids Health Dis, 2017, 16, 222.
RCT providing causal evidence	1	RCT	44	APOE	n-3 predominant	H. N. Yassine, V. Rawat, W. J. Mack, J. F. Quinn, K. Yurko-Mauro, E. Bailey-Hall, P. S. Aisen, H. C. Chui and L. S. Schneider, The effect of APOE genotype on the delivery of DHA to cerebrospinal fluid in Alzheimer's disease, Alzheimers Res Ther, 2016, 8, 25.
Large sample (N=1135) with adequate power	1	Cross-sectional	1135	APOE	n-3	C. Samieri, S. Lorrain, B. Buaud, C. Vaysse, C. Berr, E. Peuchant, S. C. Cunnane and P. Barberger-Gateau, Relationship between diet and plasma long-chain n-3 PUFAs in older people: impact of apolipoprotein E genotype, J Lipid Res, 2013, 54, 2559-2567.
RCT providing causal evidence	1	RCT	275	APOE	n-3 predominant	N. Tomaszewski, X. He, V. Solomon, M. Lee, W. J. Mack, J. F. Quinn, M. N. Braskie and H. N. Yassine, Effect of APOE Genotype on Plasma Docosahexaenoic Acid (DHA), Eicosapentaenoic Acid, Arachidonic Acid, and Hippocampal Volume in the Alzheimer's Disease Cooperative Study-Sponsored DHA Clinical Trial, J Alzheimers Dis, 2020, 74, 975-990.
Multi-arm controlled intervention	1	Intervention	82	APOE	n-3 predominant	R. Chouinard-Watkins, V. Conway, A. M. Minihane, K. G. Jackson, J. A. Lovegrove and M. Plourde, Interaction between BMI and APOE genotype is associated with changes in the plasma long-chain-PUFA response to a fish-oil supplement in healthy participants, Am J Clin Nutr, 2015, 102, 505-513.
RCT providing causal evidence	1	RCT	63	APOE	n-3 predominant	M. Karimi, I. Vedin, Y. Freund Levi, H. Basun, G. Faxen Irving, M. Eriksdotter, L. O. Wahlund, M. Schultzberg, E. Hjorth, T. Cederholm and J. Palmblad, DHA-rich n-3 fatty acid supplementation decreases DNA methylation in blood leukocytes: the OmegAD study, Am J Clin Nutr, 2017, 106, 1157-1165.
Exploratory/pilot observational design	2	Other observational	23	APOE	n-3	J. C. Matualatupauw, M. Radonjic, O. van de Rest, L. C. de Groot, J. M. Geleijnse, M. Muller and L. A. Afman, Apolipoprotein E genotype status affects habitual human blood mononuclear cell gene expression and its response to fish oil intervention, Mol Nutr Food Res, 2016, 60, 1649-1660.
Small sample (N=234); supporting evidence	2	Cross-sectional	2340	APOE	Both (n-3 & n-6)	S. Liang, L. M. Steffen, B. T. Steffen, W. Guan, N. L. Weir, S. S. Rich, A. Manichaikul, J. D. Vargas and M. Y. Tsai, APOE genotype modifies the association between plasma omega-3 fatty acids and plasma lipids in the Multi-Ethnic Study of Atherosclerosis (MESA), Atherosclerosis, 2013, 228, 181-187.
Exploratory/pilot observational design	2	Other observational	40	APOE	n-3 predominant	R. Chouinard-Watkins, C. Rioux-Perreault, M. Fortier, J. Tremblay-Mercier, Y. Zhang, P. Lawrence, M. C. Vohl, P. Perron, D. Lorrain, J. T. Brenna, S. C. Cunnane and M. Plourde, Disturbance in uniformly 13C-labelled DHA metabolism in elderly human subjects carrying the apoE epsilon4 allele, Br J Nutr, 2013, 110, 1751-1759.
Small sample (N=53); supporting evidence	2	Cross-sectional	53	APOE	n-3 predominant	G. Coughlan, R. Larsen, M. Kim, D. White, R. Gillings, M. Irvine, A. Scholey, N. Cohen, C. Legido-Quigley, M. Hornberger and A. M. Minihane, APOE ε4 alters associations between docosahexaenoic acid and preclinical markers of Alzheimer's disease, Brain Commun, 2021, 3, fcab085.
Small sample (N=211); supporting evidence	2	Cross-sectional	211	APOE	Both (n-3 & n-6)	H. Leskinen, M. Tringham, H. Karjalainen, T. Iso-Touru, H. L. Hietaranta-Luoma, P. Marnila, J. M. Pihlava, T. Hurme, H. Puolijoki, K. Akerman, S. Makinen, M. Sandell, K. Vahakangas, R. Tahvonen, S. Rokka and A. Hopia, APOE Genotypes, Lipid Profiles, and Associated Clinical Markers in a Finnish Population with Cardiovascular Disease Risk Factors, Lifestyle Genom, 2022, 15, 45-54.
Single-arm design; no control group	2	Single-arm intervention	23	APOE	n-3 predominant	V. Conway, M. J. Allard, A. M. Minihane, K. G. Jackson, J. A. Lovegrove and M. Plourde, Postprandial enrichment of triacylglycerol-rich lipoproteins with omega-3 fatty acids: lack of an interaction with apolipoprotein E genotype?, Lipids Health Dis, 2014, 13, 148.
Small sample (N=224); supporting evidence	2	Cross-sectional	224	APOE	Both (n-3 & n-6)	R. Torres-Valadez, O. Ramos-Lopez, K. J. Frias Delgadillo, A. Flores-Garcia, E. Rojas Carrillo, P. Aguiar-Garcia, J. A. Bernal Perez, E. Martinez-Lopez, J. A. Martinez and E. A. Zepeda-Carrillo, Impact of APOE Alleles-by-Diet Interactions on Glycemic and Lipid Features- A Cross-Sectional Study of a Cohort of Type 2 Diabetes Patients from Western Mexico: Implications for Personalized Medicine, Pha…
Large prospective cohort with adequate power (N=123,235) and extended follow-up period (16 years)	1	Prospective cohort	123,235 (full cohort); 25,902 (PRS subgroup)	APOE (ε2/ε3/ε4 genotypes determined by rs429358 and rs7412); AD-PRS (Alzheimer's disease polygenic risk score); PUFA-PRS (polygenic risk scores for total PUFA, N3FA, N6FA, DHA)	Both (n-3 & n-6)	Y. Zhang, J. Li, S. Liu, Q. Chen, X. Wang, S. He, Y. Wei, Y. Zou, Y. Xu, L. Wang, H. Chen, Polyunsaturated fatty acids, APOE genotypes, and dementia incidence and mortality among hypertensive adults, J Prev Alzheimers Dis 12 (2025) 100297.
RCT providing causal evidence	1	RCT	250	ARMS2, CFH	n-3 predominant	B. M. Merle, F. Richard, P. Benlian, N. Puche, C. Delcourt and E. H. Souied, CFH Y402H and ARMS2 A69S Polymorphisms and Oral Supplementation with Docosahexaenoic Acid in Neovascular Age-Related Macular Degeneration Patients: The NAT2 Study, PLoS One, 2015, 10, e0130816.
Large sample (N=982) with adequate power	1	Cross-sectional	982	BTBD10/PTH, Intergenic, LUZP2, SBSPON, Undetermined	n-3 predominant	L. K. Vaughan, H. W. Wiener, S. Aslibekyan, D. B. Allison, P. J. Havel, K. L. Stanhope, D. M. O'Brien, S. E. Hopkins, D. J. Lemas, B. B. Boyer and H. K. Tiwari, Linkage and association analysis of obesity traits reveals novel loci and interactions with dietary n-3 fatty acids in an Alaska Native (Yup'ik) population, Metabolism, 2015, 64, 689-697.
Large sample (N=404) with adequate power	1	Cross-sectional	404	CAV-1	n-3	F. Abaj and K. Mirzaei, Caveolin-1 genetic polymorphism interacts with PUFA to modulate metabolic syndrome risk, Br J Nutr, 2022, 127, 1281-1288.
Large sample (N=4786) with adequate power	1	Cohort	4786	CD36	n-3 predominant	Z. Miao, G. D. Chen, S. Huo, Y. Fu, M. Y. Wu, F. Xu, Z. Jiang, J. Tang, W. Gou, C. Xiao, Y. P. Liu, Y. Y. Wu, T. Y. Sun, L. Sun, L. R. Shen, X. Lin, Y. M. Chen and J. S. Zheng, Interaction of n-3 polyunsaturated fatty acids with host CD36 genetic variant for gut microbiome and blood lipids in human cohorts, Clin Nutr, 2022, 41, 1724-1734.
RCT providing causal evidence	1	RCT	150	CD36, NOS3, PPARG	n-3 predominant	J. S. Zheng, J. Chen, L. Wang, H. Yang, L. Fang, Y. Yu, L. Yuan, J. Feng, K. Li, J. Tang, M. Lin, C. Q. Lai and D. Li, Replication of a Gene-Diet Interaction at CD36, NOS3 and PPARG in Response to Omega-3 Fatty Acid Supplements on Blood Lipids: A Double-Blind Randomized Controlled Trial, EBioMedicine, 2018, 31, 150-156.; J. S. Zheng, Corrigendum to "Replication of a gene-diet interaction at CD36,…
Large sample (N=1620) with adequate power	1	Cross-sectional	1620	DAB1, GPA33, LOC105373456, LOC730100, EML6, CCDC88A, IL1RN, MDH1B, SORCS2, SERINC5, OSBPL3, SUGCT, STEAP2, LOC105375855, CPA6, SORBS1, GALNT18, DLG2, MUC19, LOC643339, SPATA13, RGMA, MXRA7, MIR548XHG	n-3	C. E. Annevelink, J. Westra, A. Sala-Vila, W. S. Harris, N. L. Tintle and G. C. Shearer, A Genome-Wide Interaction Study of Erythrocyte omega-3 Polyunsaturated Fatty Acid Species and Memory in the Framingham Heart Study Offspring Cohort, J Nutr, 2024, 154, 1640-1651.
Prospective cohort with temporal data	1	Cohort	250040	DAGLA, FADS3, PRS	n-3	R. Mao, X. Meng, T. Zhang, F. Wang, Y. Zhong and J. Li, Evaluating the Impact of Omega-3 Fatty Acids and Genetic Susceptibility on Atopic Dermatitis in Adults, Mol Nutr Food Res, 2025, 69, e70002.
Multi-arm controlled intervention	1	Intervention	46	FABP2	n-3 predominant	H. Pishva, S. A. Mahboob, P. Mehdipour, M. R. Eshraghian, J. Mohammadi-Asl, S. Hosseini and F. Karimi, Fatty acid-binding protein-2 genotype influences lipid and lipoprotein response to eicosapentaenoic acid supplementation in hypertriglyceridemic subjects, Nutrition, 2010, 26, 1117-1121.
Case-control study with N=120 (n<300)	2	Case-control	120	FADS1/2	Both (n-3 & n-6)	Jarullah HH, Saleh ES. Influence of Fatty Acid Desaturase Enzyme-1 Gene (FADS-1) Polymorphism on Serum Polyunsaturated Fatty Acids Levels, Desaturase Enzymes, Lipid Profile, and Glycemic Control Parameters in Newly Diagnosed Diabetic Mellitus Patients. Int J Mol Sci. 2025 Apr 24;26(9):4015. doi: 10.3390/ijms26094015. PMID: 40362254; PMCID: PMC12071304.
Large sample (N=962) with adequate power	1	Cross-sectional	962	FADS1/2	n-6	M. J. Takkunen, V. D. de Mello, U. S. Schwab, J. Kuusisto, M. Vaittinen, J. J. Agren, M. Laakso, J. Pihlajamaki and M. I. Uusitupa, Gene-diet interaction of a common FADS1 variant with marine polyunsaturated fatty acids for fatty acid composition in plasma and erythrocytes among men, Mol Nutr Food Res, 2016, 60, 381-389.
RCT providing causal evidence	1	RCT	118	FADS1/2	Both (n-3 & n-6)	T. Meuronen, M. A. Lankinen, J. Kolmert, V. D. de Mello, T. Sallinen, J. Agren, K. A. Virtanen, M. Laakso, C. E. Wheelock, J. Pihlajamaki and U. Schwab, The FADS1 rs174550 Genotype Modifies the n-3 and n-6 PUFA and Lipid Mediator Responses to a High Alpha-Linolenic Acid and High Linoleic Acid Diets, Mol Nutr Food Res, 2022, 66, e2200351.
Large sample (N=8842) with adequate power	1	Cross-sectional	8842	FADS1/2	Both (n-3 & n-6)	S. Park, D. S. Kim and S. Kang, Carrying minor allele of FADS1 and haplotype of FADS1 and FADS2 increased the risk of metabolic syndrome and moderate but not low fat diets lowered the risk in two Korean cohorts, Eur J Nutr, 2019, 58, 831-842.
RCT providing causal evidence	1	RCT	59	FADS1/2	n-3	T. Meuronen, M. A. Lankinen, O. Karkkainen, M. Laakso, J. Pihlajamaki, K. Hanhineva and U. Schwab, FADS1 rs174550 genotype and high linoleic acid diet modify plasma PUFA phospholipids in a dietary intervention study, Eur J Nutr, 2022, 61, 1109-1120.
RCT providing causal evidence	1	RCT	205	FADS1/2	Both (n-3 & n-6)	S. A. Scholtz, E. H. Kerling, D. J. Shaddy, S. Li, J. M. Thodosoff, J. Colombo and S. E. Carlson, Docosahexaenoic acid (DHA) supplementation in pregnancy differentially modulates arachidonic acid and DHA status across FADS genotypes in pregnancy, Prostaglandins Leukot Essent Fatty Acids, 2015, 94, 29-33.
Large sample (N=300) with adequate power	1	Cross-sectional	300	FADS1/2	Both (n-3 & n-6)	N. Koga, J. Ogura, F. Yoshida, K. Hattori, H. Hori, E. Aizawa, I. Ishida and H. Kunugi, Altered polyunsaturated fatty acid levels in relation to proinflammatory cytokines, fatty acid desaturase genotype, and diet in bipolar disorder, Transl Psychiatry, 2019, 9, 208.
Large sample (N=1504) with adequate power	1	Cohort	1504	FADS1/2	Both (n-3 & n-6)	P. Li, J. Zhao, K. S. D. Kothapalli, X. Li, H. Li, Y. Han, S. Mi, W. Zhao, Q. Li, H. Zhang, Y. Song, J. T. Brenna and Y. Gao, A regulatory insertion-deletion polymorphism in the FADS gene cluster influences PUFA and lipid profiles among Chinese adults: a population-based study, Am J Clin Nutr, 2018, 107, 867-875.
Large sample (N=1337) with adequate power	1	Cross-sectional	1337	FADS1/2	Both (n-3 & n-6)	M. A. Lankinen, A. Fauland, B. I. Shimizu, J. Agren, C. E. Wheelock, M. Laakso, U. Schwab and J. Pihlajamaki, Inflammatory response to dietary linoleic acid depends on FADS1 genotype, Am J Clin Nutr, 2019, 109, 165-175.
Multi-arm controlled intervention	1	Intervention	62	FADS1/2	Both (n-3 & n-6)	M. A. Lankinen, A. Fauland, B. I. Shimizu, J. Agren, C. E. Wheelock, M. Laakso, U. Schwab and J. Pihlajamaki, Inflammatory response to dietary linoleic acid depends on FADS1 genotype, Am J Clin Nutr, 2019, 109, 165-175.
RCT providing causal evidence	1	RCT	214	FADS1/2	Both (n-3 & n-6)	B. Dosso, C. M. K. Waits, K. N. Simms, S. Sergeant, D. C. Files, T. D. Howard, C. D. Langefeld, F. H. Chilton and E. Rahbar, Impact of rs174537 on Critically Ill Patients with Acute Lung Injury: A Secondary Analysis of the OMEGA Randomized Clinical Trial, Curr Dev Nutr, 2020, 4, nzaa147.
Large sample (N=816) with adequate power	1	Cross-sectional	816	FADS1/2	Both (n-3 & n-6)	P. C. Huang, H. Cheng, Y. T. Su, M. C. Huang, C. C. Hsu, S. J. Hwang, S. J. Shin and W. T. Chang, Interaction among dietary n-3 and n-6 polyunsaturated fatty acid intake, fatty acid desaturase 2 genetic variants, and low-density lipoprotein cholesterol levels in type 2 diabetes patients, J Diabetes Investig, 2023, 14, 297-308.
Prospective cohort with temporal data	1	Cohort	29674	FADS1/2	Both (n-3 & n-6)	T. Huang, T. Wang, Y. Heianza, J. Wiggs, D. Sun, H. K. Choi, J. F. Chai, X. Sim, C. C. Khor, Y. Friedlander, A. T. Chan, G. Curhan, I. Vivo, R. M. van Dam, C. K. Heng, C. Fuchs, L. R. Pasquale, J. M. Yuan, F. B. Hu, W. P. Koh and L. Qi, Fish and marine fatty acids intakes, the FADS genotypes and long-term weight gain: a prospective cohort study, BMJ Open, 2019, 9, e022877.
Large sample (N=329) with adequate power	1	Cross-sectional	329	FADS1/2	Both (n-3 & n-6)	R. A. Mathias, S. Sergeant, I. Ruczinski, D. G. Torgerson, C. E. Hugenschmidt, M. Kubala, D. Vaidya, B. Suktitipat, J. T. Ziegler, P. Ivester, D. Case, L. R. Yanek, B. I. Freedman, M. E. Rudock, K. C. Barnes, C. D. Langefeld, L. C. Becker, D. W. Bowden, D. M. Becker and F. H. Chilton, The impact of FADS genetic variants on omega6 polyunsaturated fatty acid metabolism in African Americans, BMC Gen…
Large sample (N=304) with adequate power	1	Cross-sectional	304	FADS1/2	Both (n-3 & n-6)	Z. He, R. Zhang, F. Jiang, H. Zhang, A. Zhao, B. Xu, L. Jin, T. Wang, W. Jia, W. Jia and C. Hu, FADS1-FADS2 genetic polymorphisms are associated with fatty acid metabolism through changes in DNA methylation and gene expression, Clin Epigenetics, 2018, 10, 113.
Prospective cohort with temporal data	1	Cohort	224	FADS1/2	Both (n-3 & n-6)	R. A. Mathias, C. Vergara, L. Gao, N. Rafaels, T. Hand, M. Campbell, C. Bickel, P. Ivester, S. Sergeant, K. C. Barnes and F. H. Chilton, FADS genetic variants and omega-6 polyunsaturated fatty acid metabolism in a homogeneous island population, J Lipid Res, 2010, 51, 2766-2774.
Large sample (N=321) with adequate power	1	Cross-sectional	2672	FADS1/2	Both (n-3 & n-6)	J. Zhu, Q. Sun, G. Zong, Y. Si, C. Liu, Q. Qi, X. Ye, L. Sun, H. Sheng, H. Li and X. Lin, Interaction between a common variant in FADS1 and erythrocyte polyunsaturated fatty acids on lipid profile in Chinese Hans, J Lipid Res, 2013, 54, 1477-1483.
RCT providing causal evidence	1	RCT	74	FADS1/2	Both (n-3 & n-6)	S. D. Reyes-Perez, K. Gonzalez-Becerra, E. Barron-Cabrera, J. F. Munoz-Valle, J. Armendariz-Borunda and E. Martinez-Lopez, FADS1 Genetic Variant and Omega-3 Supplementation Are Associated with Changes in Fatty Acid Composition in Red Blood Cells of Subjects with Obesity, Nutrients, 2024, 16.
EPIC-InterAct: Large prospective case-cohort (N=17,128) with adequate power; PREDIMED: RCT with controlled dietary intervention (N=928)	1	Case-cohort + RCT	17,128 + 928	FADS1/2	Both (n-3 & n-6)	Jäger S, Kuxhaus O, Prada M, et al. Nut consumption, linoleic and α-linolenic acid intakes, and genetics: how fatty acid desaturase 1 impacts plasma fatty acids and type 2 diabetes risk in EPIC-InterAct and PREDIMED studies. BMC Medicine. 2025;23:344. DOI: 10.1186/s12916-025-04187-8
Exploratory/pilot observational design	1	Intervention trial using stable isotope tracer	55	FADS1/2	Both (n-3 & n-6)	H. Sasaki, T. Sueyasu, H. Tokuda, M. Ito, Y. Kaneda, T. Rogi, H. Kawashima, S. Horiguchi, T. Kawabata and H. Shibata, Aging and FADS1 polymorphisms decrease the biosynthetic capacity of long-chain PUFAs: A human trial using [U-13C]linoleic acid, Prostaglandins, Leukotrienes and Essential Fatty Acids, 2019, 148, 1-8.
Small sample (N=111); supporting evidence	2	Cross-sectional	111	FADS1/2	Both (n-3 & n-6)	J. P. Schuchardt, T. Kobe, V. Witte, J. Willers, A. Gingrich, V. Tesky, J. Pantel, D. Rujescu, T. Illig, A. Floel and A. Hahn, Genetic Variants of the FADS Gene Cluster Are Associated with Erythrocyte Membrane LC PUFA Levels in Patients with Mild Cognitive Impairment, J Nutr Health Aging, 2016, 20, 611-620.
Retrospective case-control design	2	Case-control	752	FADS1/2	Both (n-3 & n-6)	M. Yao, J. Li, T. Xie, T. He, L. Fang, Y. Shi, L. Hou, K. Lian, R. Wang and L. Jiang, Polymorphisms of rs174616 in the FADS1-FADS2 gene cluster is associated with a reduced risk of type 2 diabetes mellitus in northern Han Chinese people, Diabetes Res Clin Pract, 2015, 109, 206-212.
Small sample (N=226); supporting evidence	2	Cross-sectional	226	FADS1/2	Both (n-3 & n-6)	T. M. M. Fujii, M. M. Norde, R. M. Fisberg, D. M. L. Marchioni, J. M. Ordovas and M. M. Rogero, FADS1 and ELOVL2 polymorphisms reveal associations for differences in lipid metabolism in a cross-sectional population-based survey of Brazilian men and women, Nutr Res, 2020, 78, 42-49.
Small sample (N=84); supporting evidence	2	Cross-sectional	84	FADS1/2	Both (n-3 & n-6)	M. M. Zec, L. Stojkovic, M. Zekovic, B. Pokimica, M. Zivkovic, A. Stankovic and M. Glibetic, FADS2 polymorphisms are associated with plasma arachidonic acid and estimated desaturase-5 activity in a cross-sectional study, Nutr Res, 2020, 83, 49-62.
Small sample (N=124); supporting evidence	2	Cross-sectional	124	FADS1/2	Both (n-3 & n-6)	S. Horiguchi, K. Nakayama, S. Iwamoto, A. Ishijima, T. Minezaki, M. Baba, Y. Kontai, C. Horikawa, H. Kawashima, H. Shibata, Y. Kagawa and T. Kawabata, Associations between a fatty acid desaturase gene polymorphism and blood arachidonic acid compositions in Japanese elderly, Prostaglandins Leukot Essent Fatty Acids, 2016, 105, 9-14.
Exploratory/pilot observational design	2	Other observational	287	FADS1/2	Both (n-3 & n-6)	M. Kim, M. Kim, H. J. Yoo, A. Lee, S. Jeong and J. H. Lee, Associations among FADS1 rs174547, eicosapentaenoic acid/arachidonic acid ratio, and arterial stiffness in overweight subjects, Prostaglandins Leukot Essent Fatty Acids, 2018, 130, 11-18.
Retrospective case-control design	2	Case-control	131	FADS1/2	Both (n-3 & n-6)	A. Muzsik, H. H. Jelen and A. Chmurzynska, Corrigendum to 'Metabolic syndrome in postmenopausal women is associated with lower erythrocyte PUFA/MUFA and n-3/n-6 ratio: A case-control study'[Prostaglandins Leukot Essent Fatty Acids. 2020 Aug;159:102155.], Prostaglandins Leukot Essent Fatty Acids, 2022, 185, 102436.
Retrospective case-control design	2	Case-control	1733	FADS1/2	Both (n-3 & n-6)	S. B. Rifkin, M. J. Shrubsole, Q. Cai, W. E. Smalley, R. M. Ness, L. L. Swift, G. Milne, W. Zheng and H. J. Murff, Differences in erythrocyte phospholipid membrane long-chain polyunsaturated fatty acids and the prevalence of fatty acid desaturase genotype among African Americans and European Americans, Prostaglandins Leukot Essent Fatty Acids, 2021, 164, 102216.
Retrospective case-control design	2	Case-control	2288	FADS1/2	Both (n-3 & n-6)	J. Juan, H. Huang, X. Jiang, A. V. Ardisson Korat, M. Song, Q. Sun, W. C. Willett, M. K. Jensen and P. Kraft, Joint effects of fatty acid desaturase 1 polymorphisms and dietary polyunsaturated fatty acid intake on circulating fatty acid proportions, Am J Clin Nutr, 2018, 107, 826-833.
Retrospective case-control design	2	Case-control	735	FADS1/2	Both (n-3 & n-6)	A. N. Ananthakrishnan, H. Khalili, M. Song, L. M. Higuchi, P. Lochhead, J. M. Richter and A. T. Chan, Genetic Polymorphisms in Fatty Acid Metabolism Modify the Association Between Dietary n3: n6 Intake and Risk of Ulcerative Colitis: A Prospective Cohort Study, Inflamm Bowel Dis, 2017, 23, 1898-1904.
Small sample (N=67); supporting evidence	2	Cross-sectional	67	FADS1/2	Both (n-3 & n-6)	H. Guo, L. Zhang, C. Zhu, F. Yang, S. Wang, S. Zhu and X. Ma, A Single Nucleotide Polymorphism in the FADS1 Gene is Associated with Plasma Fatty Acid and Lipid Profiles and Might Explain Gender Difference in Body Fat Distribution, Lipids Health Dis, 2017, 16, 67.
Retrospective case-control design	2	Case-control	1278	FADS1/2	Both (n-3 & n-6)	F. Liu, Z. Li, X. Lv and J. Ma, Dietary n-3 polyunsaturated fatty acid intakes modify the effect of genetic variation in fatty acid desaturase 1 on coronary artery disease, PLoS One, 2015, 10, e0121255.
Exploratory/pilot observational design	2	Other observational	85	FADS1/2	Both (n-3 & n-6)	M. Rabehl, Z. Wei, C. G. Leineweber, J. Enssle, M. Rothe, A. Jung, C. Schmocker, U. Elbelt, K. H. Weylandt and A. Pietzner, Effect of FADS1 SNPs rs174546, rs174547 and rs174550 on blood fatty acid profiles and plasma free oxylipins, Front Nutr, 2024, 11, 1356986.
Single-arm design; no control group	2	Single-arm intervention	90	FADS1/2	Both (n-3 & n-6)	M. Rittenhouse, N. Sambuughin and P. Deuster, Optimization of Omega-3 Index Levels in Athletes at the US Naval Academy: Personalized Omega-3 Fatty Acid Dosage and Molecular Genetic Approaches, Nutrients, 2022, 14.
Large sample (N=628) with adequate power	2	Case-control	628	FADS1/2, ELOVL2	Both (n-3 & n-6)	W. Khamlaoui, S. Mehri, S. Hammami, S. Hammouda, I. Chraeif, R. Elosua and M. Hammami, Association Between Genetic Variants in FADS1-FADS2 and ELOVL2 and Obesity, Lipid Traits, and Fatty Acids in Tunisian Population, Clin Appl Thromb Hemost, 2020, 26, 1076029620915286.
Large sample (N=493) with adequate power	1	Cross-sectional	493	FADS1/2/3, ELOVL2/5	Both (n-3 & n-6)	Blomquist SA, Albrecht JH, Hallmark B, Klimentidis YC, Garcia LA, Mandarino LJ, Coletta DK, Chilton FH. The influence of FADS genetic variation and omega-3 fatty acid deficiency on cardiometabolic disease risk in a Mexican American population. Front Nutr. 2025;12:1538505.
Large sample (N=200,060) with genome-wide interaction analysis providing robust statistical power	1	Cross-sectional GWIS	200060	FADS1/FADS2, GPR12, FADS3, TMEM258, MYRF, FEN1, RAB3IL1, BEST1, FTH1	n-3	Ihejirika SA, Chiang AH, Singh A, Stephen E, Chen H, Ye K. A multi-level gene-diet interaction analysis of fish oil and 14 polyunsaturated fatty acid traits identifies the FADS and GPR12 loci. HGG Adv. 2025 Jul 10;6(3):100459. doi: 10.1016/j.xhgg.2025.100459. Epub 2025 May 21. PMID: 40405463; PMCID: PMC12172259.
Exploratory/pilot observational design	1	Cross-sectional + RCT	1570	FADS1/FADS2	Both (n-3 & n-6)	S. Romero-Hidalgo, J. Sagaceta-Mejia, M. Villalobos-Comparan, M. E. Tejero, M. Dominguez-Perez, L. Jacobo-Albavera, R. Posadas-Sanchez, G. Vargas-Alarcon, C. Posadas-Romero, L. Macias-Kauffer, F. Vadillo-Ortega, M. A. Contreras-Sieck, V. Acuna-Alonzo, R. Barquera, G. Macin, A. Binia, J. G. Guevara-Chavez, L. Sebastian-Medina, M. Menjivar, S. Canizales-Quinteros, A. Carnevale and T. Villarreal-Mol…
Single-arm design; no control group	2	Single-arm intervention	210	FFAR4	n-3 predominant	B. Vallee Marcotte, H. Cormier, I. Rudkowska, S. Lemieux, P. Couture and M. C. Vohl, Polymorphisms in FFAR4 (GPR120) Gene Modulate Insulin Levels and Sensitivity after Fish Oil Supplementation, J Pers Med, 2017, 7.
Small sample (N=279); supporting evidence	2	Cross-sectional	279	GRS (3-SNP)	n-3	N. Rasaei, E. Daneshzad, A. Khadem, F. Gholami, M. Samadi and K. Mirzaei, Investigation of the interaction between genetic risk score (GRS) and fatty acid quality indices on metabolic syndrome among overweight and obese women, BMC Med Genomics, 2024, 17, 113.
Small sample (N=279); supporting evidence	2	Cross-sectional	279	GRS (3-SNP)	Both (n-3 & n-6)	N. Rasaei, S. F. Fatemi, F. Gholami, M. Samadi, M. K. Mohammadian, E. Daneshzad and K. Mirzaei, Interaction of genetics risk score and fatty acids quality indices on healthy and unhealthy obesity phenotype, BMC Med Genomics, 2025, 18, 16.
Large sample (N=8842) with adequate power	1	Cross-sectional	8842	GWAS	Both (n-3 & n-6)	M. Liu, H. S. Jin and S. Park, Protein and fat intake interacts with the haplotype of PTPN11_rs11066325, RPH3A_rs886477, and OAS3_rs2072134 to modulate serum HDL concentrations in middle-aged people, Clin Nutr, 2020, 39, 942-949.
Single-arm design; no control group	2	Single-arm intervention	208	GWAS	n-3 predominant	B. Vallee Marcotte, F. Guenard, S. Lemieux, P. Couture, I. Rudkowska, P. C. Calder, A. M. Minihane and M. C. Vohl, Fine mapping of genome-wide association study signals to identify genetic markers of the plasma triglyceride response to an omega-3 fatty acid supplementation, Am J Clin Nutr, 2019, 109, 176-185.
Single-arm design; no control group	2	Single-arm intervention	208	GWAS	n-3 predominant	B. Vallee Marcotte, H. Cormier, F. Guenard, I. Rudkowska, S. Lemieux, P. Couture and M. C. Vohl, Novel Genetic Loci Associated with the Plasma Triglyceride Response to an Omega-3 Fatty Acid Supplementation, J Nutrigenet Nutrigenomics, 2016, 9, 1-11.
Single-arm design; no control group	2	Single-arm intervention	138	GWAS	n-3 predominant	M. Franck, J. de Toro-Martin, F. Guenard, I. Rudkowska, S. Lemieux, B. Lamarche, P. Couture and M. C. Vohl, Prevention of Potential Adverse Metabolic Effects of a Supplementation with Omega-3 Fatty Acids Using a Genetic Score Approach, Lifestyle Genom, 2020, 13, 32-42.
Large sample (N=848) with adequate power	1	Cross-sectional	848	IL6	Both (n-3 & n-6)	Y. Ma, C. E. Smith, C. Q. Lai, M. R. Irvin, L. D. Parnell, Y. C. Lee, L. D. Pham, S. Aslibekyan, S. A. Claas, M. Y. Tsai, I. B. Borecki, E. K. Kabagambe, J. M. Ordovas, D. M. Absher and D. K. Arnett, The effects of omega-3 polyunsaturated fatty acids and genetic variants on methylation levels of the interleukin-6 gene promoter, Mol Nutr Food Res, 2016, 60, 410-419.
Large sample (N=665) with adequate power	1	Cross-sectional	665	IL6	Both (n-3 & n-6)	R. P. Parajuli, J. M. Goodrich, H. M. Chan, M. Lemire, P. Ayotte, R. A. Hegele and N. Basu, Variation in biomarker levels of metals, persistent organic pollutants, and omega-3 fatty acids in association with genetic polymorphisms among Inuit in Nunavik, Canada, Environ Res, 2021, 200, 111393.
Large sample (N=301) with adequate power	1	Cross-sectional	301	Inflammatory	Both (n-3 & n-6)	M. Maintinguer Norde, E. Oki, A. A. Ferreira Carioca, N. R. Teixeira Damasceno, R. M. Fisberg, D. M. Lobo Marchioni and M. M. Rogero, Influence of IL1B, IL6 and IL10 gene variants and plasma fatty acid interaction on metabolic syndrome risk in a cross-sectional population-based study, Clin Nutr, 2018, 37, 659-666.
Small sample (N=281); supporting evidence	2	Cross-sectional	281	Inflammatory	Both (n-3 & n-6)	E. Oki, M. N. Norde, A. A. F. Carioca, J. M. P. Souza, I. A. Castro, D. M. L. Marchioni, R. M. Fisberg and M. M. Rogero, Polymorphisms of the TNF-alpha gene interact with plasma fatty acids on inflammatory biomarker profile: a population-based, cross-sectional study in Sao Paulo, Brazil, Br J Nutr, 2017, 117, 1663-1673.
Small sample (N=150); supporting evidence	2	Cross-sectional	150	Inflammatory	n-6	A. Rodrigues, L. P. S. Rosa, H. D. da Silva, E. P. Silveira-Lacerda and E. A. Silveira, The Single Nucleotide Polymorphism PPARG2 Pro12Ala Affects Body Mass Index, Fat Mass, and Blood Pressure in Severely Obese Patients, J Obes, 2018, 2018, 2743081.
Large sample (N=1171) with adequate power	1	Cross-sectional	1171	LPL	n-3	Y. Ma, K. L. Tucker, C. E. Smith, Y. C. Lee, T. Huang, K. Richardson, L. D. Parnell, C. Q. Lai, K. L. Young, A. E. Justice, Y. Shao, K. E. North and J. M. Ordovas, Lipoprotein lipase variants interact with polyunsaturated fatty acids for obesity traits in women: replication in two populations, Nutr Metab Cardiovasc Dis, 2014, 24, 1323-1329.
Large sample (N=587) with adequate power	1	Cross-sectional	587	MLXIPL	Both (n-3 & n-6)	M. Maldonado-Gonzalez, Z. H. Hernandez-Nazara, N. Torres-Castillo, E. Martinez-Lopez, L. de la Cruz-Color and B. Ruiz-Madrigal, Association between the rs3812316 Single Nucleotide Variant of the MLXIPL Gene and Alpha-Linolenic Acid Intake with Triglycerides in Mexican Mestizo Women, Nutrients, 2022, 14.
Exploratory/pilot observational design	1	Cross-sectional	995	MTHFR	Both (n-3 & n-6)	T. Huang, K. L. Tucker, Y. C. Lee, J. W. Crott, L. D. Parnell, J. Shen, C. E. Smith, J. M. Ordovas, D. Li and C. Q. Lai, Methylenetetrahydrofolate reductase variants associated with hypertension and cardiovascular disease interact with dietary polyunsaturated fatty acids to modulate plasma homocysteine in puerto rican adults, J Nutr, 2011, 141, 654-659.
Multi-arm controlled intervention	1	Intervention	132	Other	Both (n-3 & n-6)	D. A. de Luis, R. Aller, O. Izaola, M. Gonzalez Sagrado, R. Conde, B. de la Fuente and D. Primo, Effect of Lys656Asn Polymorphism of Leptin Receptor Gene on Cardiovascular Risk Factors and Serum Adipokine Levels after a High Polyunsaturated Fat Diet in Obese Patients, J Clin Lab Anal, 2015, 29, 432-436.
Large sample (N=452) with adequate power	1	Cross-sectional	452	Other	n-3	P. Perez-Martinez, J. Delgado-Lista, A. Garcia-Rios, A. C. Tierney, H. L. Gulseth, C. M. Williams, B. Karlstrom, B. Kiec-Wilk, E. E. Blaak, O. Helal, W. H. Saris, C. Defoort, C. A. Drevon, J. A. Lovegrove, A. Dembinska-Kiec, U. Riserus, H. M. Roche and J. Lopez-Miranda, Insulin receptor substrate-2 gene variants in subjects with metabolic syndrome: association with plasma monounsaturated and n-3 …
RCT providing causal evidence	1	RCT	362	Other	n-3	R. Aller, D. Primo, O. Izaola and D. A. de Luis, Common polymorphism in the cannabinoid receptor gene type 2 (<em>CB2R</em>) rs3123554 are associated with metabolic changes after two different hypocaloric diets with different dietary fatty profiles, Clinical Nutrition, 2019, 38, 2632-2638.
Large sample (N=700) with adequate power	1	Cross-sectional	700	Other	n-3	M. Rafiee, G. Sotoudeh, M. Djalali, E. Alvandi, M. Eshraghian, F. Sojoudi and F. Koohdani, Dietary omega-3 polyunsaturated fatty acid intake modulates impact of Insertion/Deletion polymorphism of ApoB gene on obesity risk in type 2 diabetic patients, Nutrition, 2016, 32, 1110-1115.
Multi-arm controlled intervention	1	Intervention	20	Other	n-3 predominant	C. S. Kuttner, R. Mancina, G. Wagenpfeil, F. Lammert and C. S. Stokes, Four-Week Omega-3 Supplementation in Carriers of the Prosteatotic PNPLA3 p.I148M Genetic Variant: An Open-Label Study, Lifestyle Genom, 2019, 12, 10-17.
Large sample (N=1570) with adequate power	1	Cross-sectional	1570	Other	n-6	L. Skotte, A. Koch, V. Yakimov, S. Zhou, B. Soborg, M. Andersson, S. W. Michelsen, J. E. Navne, J. M. Mistry, P. A. Dion, M. L. Pedersen, M. L. Borresen, G. A. Rouleau, F. Geller, M. Melbye and B. Feenstra, CPT1A Missense Mutation Associated With Fatty Acid Metabolism and Reduced Height in Greenlanders, Circ Cardiovasc Genet, 2017, 10.
Large sample (N=377) with adequate power	1	Cross-sectional	377	Other	n-3	A. Mirzababaei, E. Daneshzad, F. Shiraseb, S. Pourreza, L. Setayesh, C. C. T. Clark, H. Tangestani, F. Abaj, H. Yarizadeh and K. Mirzaei, Variants of the cry 1 gene may influence the effect of fat intake on resting metabolic rate in women with overweight of obesity: a cross-sectional study, BMC Endocr Disord, 2021, 21, 196.
Large sample (N=379) with adequate power	1	Cross-sectional	379	Other	Both (n-3 & n-6)	P. Perez-Martinez, J. Delgado-Lista, A. Garcia-Rios, J. Mc Monagle, H. L. Gulseth, J. M. Ordovas, D. I. Shaw, B. Karlstrom, B. Kiec-Wilk, E. E. Blaak, O. Helal, M. Malczewska-Malec, C. Defoort, U. Riserus, W. H. Saris, J. A. Lovegrove, C. A. Drevon, H. M. Roche and J. Lopez-Miranda, Glucokinase regulatory protein genetic variant interacts with omega-3 PUFA to influence insulin resistance and infl…
RCT providing causal evidence	1	RCT	99	Other	n-3 predominant	E. Pokushalov, A. Ponomarenko, S. Bayramova, C. Garcia, I. Pak, E. Shrainer, E. Voronina, E. Sokolova, M. Johnson and R. Miller, Evaluating the Impact of Omega-3 Fatty Acid (Soloways(TM)) Supplementation on Lipid Profiles in Adults with PPARG Polymorphisms: A Randomized, Double-Blind, Placebo-Controlled Trial, Nutrients, 2023, 16.
Prospective cohort with temporal data	1	Cohort	3089	Other	n-3	A. Gammelmark, S. Lundbye-Christensen, A. Tjonneland, E. B. Schmidt, K. Overvad and M. S. Nielsen, Interactions between 5-Lipoxygenase Polymorphisms and Adipose Tissue Contents of Arachidonic and Eicosapentaenoic Acids Do Not Affect Risk of Myocardial Infarction in Middle-Aged Men and Women in a Danish Case-Cohort Study, J Nutr, 2017, 147, 1340-1347.
Retrospective case-control design	2	Case-control	351	Other	n-3	I. P. Kalafati, M. Dimitriou, D. Borsa, J. Vlachogiannakos, K. Revenas, A. Kokkinos, S. D. Ladas and G. V. Dedoussis, Fish intake interacts with TM6SF2 gene variant to affect NAFLD risk: results of a case-control study, Eur J Nutr, 2019, 58, 1463-1473.
Retrospective case-control design	2	Case-control	80	Other	n-6	J. Don, D. G. Secchi, M. F. Galíndez, L. R. Aballay, M. E. Pasqualini and M. Brunotto, The association among TP53 rs1042522, pri-miR 34b/c rs4938723 polymorphisms and daily dietary fatty acids in patients with premalignant and malignant oral lesions, Human Gene, 2022, 34, 201082.
Small sample (N=180); supporting evidence	2	Cross-sectional	180	Other	Both (n-3 & n-6)	L. Keramat, H. Sadrzadeh-Yeganeh, G. Sotoudeh, E. Zamani, M. Eshraghian, A. Mansoori and F. Koohdani, Apolipoprotein A2 −265 T>C polymorphism interacts with dietary fatty acids intake to modulate inflammation in type 2 diabetes mellitus patients, Nutrition, 2017, 37, 86-91.
Small sample (N=39); supporting evidence	2	Cross-sectional	39	Other	Both (n-3 & n-6)	F. G. Santos, M. K. Becker, V. S. Correa, D. N. Garcia, S. C. Vale, J. A. Crespo-Ribeiro, C. C. Barros and A. Schneider, The effect of the paraoxonase 1 (PON1) T(-107)C polymorphism on serum PON1 activity in women is dependent on fatty acid intake, Nutr Res, 2016, 36, 9-15.
Retrospective case-control design	2	Case-control	77	Other	Both (n-3 & n-6)	R. W. Gan, K. A. Young, G. O. Zerbe, M. K. Demoruelle, M. H. Weisman, J. H. Buckner, P. K. Gregersen, T. R. Mikuls, J. R. O'Dell, R. M. Keating, M. J. Clare-Salzler, K. D. Deane, V. M. Holers and J. M. Norris, Lower omega-3 fatty acids are associated with the presence of anti-cyclic citrullinated peptide autoantibodies in a population at risk for future rheumatoid arthritis: a nested case-control…
Retrospective case-control design	2	Case-control	540	Other	Both (n-3 & n-6)	S. Doaei, S. Abdollahi, G. K. Mohseni, M. Gholamalizadeh, M. E. Akbari, S. M. Poorhosseini, S. E. Bagheri, S. Ghafouri-Fard, G. A. Tabesh, A. Moslem, N. Hasanpour Ardekanizadeh, S. Omidi, A. Hekmatdoost, M. Alam Rajabi, S. A. Mosavi Jarrahi and M. O. Goodarzi, The effects of FTO gene rs9939609 polymorphism on the association between breast cancer and dietary intake, J Cell Mol Med, 2022, 26, 5794…
Small sample (N=178); supporting evidence	2	Cross-sectional	178	Other	n-3	S. R. Mitra, P. Y. Tan and F. Amini, Association of ADRB2 rs1042713 with Obesity and Obesity-Related Phenotypes and Its Interaction with Dietary Fat in Modulating Glycaemic Indices in Malaysian Adults, J Nutr Metab, 2019, 2019, 8718795.
Small sample (N=101); supporting evidence	2	Cross-sectional	101	Other	n-3	B. A. Hannon, C. G. Edwards, S. V. Thompson, S. K. Burke, N. A. Burd, H. D. Holscher, M. Teran-Garcia and N. A. Khan, Genetic Variants in Lipid Metabolism Pathways Interact with Diet to Influence Blood Lipid Concentrations in Adults with Overweight and Obesity, Lifestyle Genom, 2020, 13, 155-163.
Single-arm design; no control group	2	Single-arm intervention	210	Other	n-3 predominant	C. Ouellette, I. Rudkowska, S. Lemieux, B. Lamarche, P. Couture and M. C. Vohl, Gene-diet interactions with polymorphisms of the MGLL gene on plasma low-density lipoprotein cholesterol and size following an omega-3 polyunsaturated fatty acid supplementation: a clinical trial, Lipids Health Dis, 2014, 13, 86.
Single-arm design; no control group	2	Single-arm intervention	191	Other	n-3 predominant	B. Vallee Marcotte, F. Guenard, J. Marquis, A. Charpagne, F. Vadillo-Ortega, M. E. Tejero, A. Binia and M. C. Vohl, Genetic Risk Score Predictive of the Plasma Triglyceride Response to an Omega-3 Fatty Acid Supplementation in a Mexican Population, Nutrients, 2019, 11.
Retrospective case-control design	2	Case-control	1932	Other	Both (n-3 & n-6)	Z. Yu, T. Huang, Y. Zheng, T. Wang, Y. Heianza, D. Sun, H. Campos and L. Qi, PCSK9 variant, long-chain n-3 PUFAs, and risk of nonfatal myocardial infarction in Costa Rican Hispanics, Am J Clin Nutr, 2017, 105, 1198-1203.
Small sample (N=231); supporting evidence	2	Cross-sectional	231	Other	Both (n-3 & n-6)	R. Fujii, Y. Ando, H. Yamada, Y. Tsuboi, E. Munetsuna, M. Yamazaki, G. Mizuno, K. Maeda, K. Ohashi, H. Ishikawa, M. Watanabe, N. Imaeda, C. Goto, K. Wakai, S. Hashimoto and K. Suzuki, Integration of methylation quantitative trait loci (mQTL) on dietary intake on DNA methylation levels: an example of n-3 PUFA and ABCA1 gene, Eur J Clin Nutr, 2023, 77, 881-887.
Exploratory/pilot observational design	2	Other observational	1869	PLA2G2A	Both (n-3 & n-6)	R. N. Lemaitre, T. M. Bartz, I. B. King, J. A. Brody, B. McKnight, N. Sotoodehnia, T. D. Rea, C. O. Johnson, D. Mozaffarian, S. Hesselson, P. Y. Kwok and D. S. Siscovick, Circulating n-3 fatty acids and trans-fatty acids, PLA2G2A gene variation and sudden cardiac arrest, J Nutr Sci, 2016, 5, e12.
Single-arm design; no control group	2	Single-arm intervention	208	PLA2G2C, PLA2G2F, PLA2G4A, PLA2G7	n-3 predominant	B. L. Tremblay, H. Cormier, I. Rudkowska, S. Lemieux, P. Couture and M. C. Vohl, Association between polymorphisms in phospholipase A2 genes and the plasma triglyceride response to an n-3 PUFA supplementation: a clinical trial, Lipids Health Dis, 2015, 14, 12.
Single-arm design; no control group	2	Single-arm intervention	191	PLA2G4A, PLA2G6	n-3 predominant	B. L. Tremblay, I. Rudkowska, P. Couture, S. Lemieux, P. Julien and M. C. Vohl, Modulation of C-reactive protein and plasma omega-6 fatty acid levels by phospholipase A2 gene polymorphisms following a 6-week supplementation with fish oil, Prostaglandins Leukot Essent Fatty Acids, 2015, 102-103, 37-45.
Large sample (N=452) with adequate power	1	Cross-sectional	452	PNPLA3	Both (n-3 & n-6)	E. Vilar-Gomez, C. J. Pirola, S. Sookoian, L. A. Wilson, P. Belt, T. Liang, W. Liu and N. Chalasani, Impact of the Association Between PNPLA3 Genetic Variation and Dietary Intake on the Risk of Significant Fibrosis in Patients With NAFLD, Am J Gastroenterol, 2021, 116, 994-1006.
Single-arm design; no control group	2	Single-arm intervention	191	PPARA, PPARγ2	n-3 predominant	A. Binia, C. Vargas-Martínez, M. Ancira-Moreno, L. M. Gosoniu, I. Montoliu, E. Gámez-Valdez, D. C. Soria-Contreras, A. Angeles-Quezada, R. Gonzalez-Alberto, S. Fernández, D. Martínez-Conde, B. Hernández-Morán, M. Ramírez-Solano, C. Pérez-Ortega, Y. Rodríguez-Carmona, I. Castan, I. Rubio-Aliaga, F. Vadillo-Ortega, R. Márquez-Velasco, R. Bojalil, J. C. López-Alvarenga, P. Valet, M. Kussmann, I. Sil…
RCT providing causal evidence	1	RCT	72	PPARG	n-3 predominant	A. Mansoori, G. Sotoudeh, M. Djalali, M. R. Eshraghian, M. Keramatipour, E. Nasli-Esfahani, F. Shidfar, E. Alvandi, O. Toupchian and F. Koohdani, Docosahexaenoic Acid-Rich Fish Oil Supplementation Improves Body Composition without Influence of the PPARgamma Pro12Ala Polymorphism in Patients with Type 2 Diabetes: A Randomized, Double-Blind, Placebo-Controlled Clinical Trial, J Nutrigenet Nutrigeno…
Small sample (N=290); supporting evidence	2	Cross-sectional	290	PPARG	Both (n-3 & n-6)	F. Koohdani, G. Sotoudeh, Z. Kalantar and A. Mansoori, PPARgamma Pro12Ala Polymorphism Influences the Relationship between Dietary Fat Intake, Adiposity and Lipid Profile in Patients with Type 2 Diabetes, Int J Vitam Nutr Res, 2018, 88, 263-269.
Small sample (N=288); supporting evidence	2	Cross-sectional	288	PPARGC1A	n-3	S. Moradi, K. Mirzaei, Z. Maghbooli, A. A. Abdurahman and S. A. Keshavarz, Variants in the PPARGC1A Gene may Influence the Effect of Fat Intake on Resting Metabolic Rate in Obese Women, Lipids, 2018, 53, 291-300.
Small sample (N=271); supporting evidence	2	Cross-sectional	271	PPARγ2	Both (n-3 & n-6)	B. Grygiel-Gorniak, E. Kaczmarek, M. Mosor, J. Przyslawski and J. Nowak, The Gene-Diet Associations in Postmenopausal Women with Newly Diagnosed Dyslipidemia, J Nutr Health Aging, 2017, 21, 1031-1037.
Large sample (N=1981) with adequate power	1	Cross-sectional	1981	RETN	Both (n-3 & n-6)	Y. Noumi, R. Kawamura, Y. Tabara, K. Maruyama, Y. Takata, W. Nishida, A. Okamoto, T. Nishimiya, H. Onuma, I. Saito, T. Tanigawa and H. Osawa, An inverse association between serum resistin levels and n-3 polyunsaturated fatty acids intake was strongest in the SNP-420 G/G genotype in the Japanese cohort: The Toon Genome Study, Clin Endocrinol (Oxf), 2018, 88, 51-57.
Large sample (N=1982) with adequate power	1	Cross-sectional	1982	SIDT2	n-3	G. Leon-Reyes, A. D. Argoty-Pantoja, B. Rivera-Paredez, A. Hidalgo-Bravo, Y. N. Flores, J. Salmeron and R. Velazquez-Cruz, Interaction between SIDT2 and ABCA1 Variants with Nutrients on HDL-c Levels in Mexican Adults, Nutrients, 2023, 15.
Large sample (N=1882) with adequate power	1	Cross-sectional	1882	TCF7L2	n-3	D. Bodhini, S. Gaal, I. Shatwan, K. Ramya, B. Ellahi, S. Surendran, V. Sudha, M. R. Anjana, V. Mohan, J. A. Lovegrove, V. Radha and K. S. Vimaleswaran, Interaction between TCF7L2 polymorphism and dietary fat intake on high density lipoprotein cholesterol, PLoS One, 2017, 12, e0188382.
Prospective cohort with temporal data	1	Cross-sectional	1083	TCF7L2	Both (n-3 & n-6)	D. Warodomwichit, D. K. Arnett, E. K. Kabagambe, M. Y. Tsai, J. E. Hixson, R. J. Straka, M. Province, P. An, C. Q. Lai, I. Borecki and J. M. Ordovas, Polyunsaturated fatty acids modulate the effect of TCF7L2 gene variants on postprandial lipemia, J Nutr, 2009, 139, 439-446.
Small sample (N=262); supporting evidence	2	Cross-sectional	262	TLR4	n-3	M. M. Norde, E. Oki, A. A. F. Carioca, I. A. Castro, J. M. P. Souza, D. M. L. Marchioni, R. M. Fisberg and M. M. Rogero, Influence of toll-like receptor 4 gene variants and plasma fatty acid profile on systemic inflammation: A population-based cross-sectional study, Nutrition, 2017, 35, 106-111.

## Sheet: Tier criteria
TWO-TIER EVIDENCE CLASSIFICATION CRITERIA
TIER 1: HIGH-QUALITY CORE EVIDENCE
Studies meeting one or more of the following criteria:
1. Study Design - Causal Evidence:
• Randomized Controlled Trials (RCTs) with PUFA interventions
• Multi-arm intervention studies with control groups
• Prospective cohort studies with longitudinal follow-up
2. Study Design - Strong Observational:
• Cross-sectional studies with sample size ≥ 300
• Large biobank or population-based studies
RATIONALE FOR TIER 1:
• RCTs and interventions provide causal evidence for gene-PUFA interactions
• Cohort studies establish temporal relationships
• Large cross-sectional studies have statistical power to detect effects
• These study types minimize confounding and selection bias
TIER 2: SUPPORTING EVIDENCE
All other studies meeting PICO eligibility criteria:
• Small cross-sectional studies (N < 300)
• Single-arm intervention studies
• Case-control studies
• Pilot studies and exploratory analyses
RATIONALE FOR TIER 2:
• Valuable for hypothesis generation
• Provide evidence from diverse populations
• Useful for consistency checks across populations
• May identify novel gene-PUFA interactions for future study
• Methodological limitations prevent them from being primary evidence
