# Supplementary material for: Genetic modulation of omega-3 and omega-6 polyunsaturated fatty acid metabolism and health outcomes: a systematic review
Source: Royal Society of Chemistry journal article supplement (doi:10.1039/d5fo04964d), 2026-01-01
Supplement: d5fo04964d4.xlsx [file d5fo04964d4.xlsx]

## Sheet: Sheet1
Gene	Variant	PUFA Type	Outcome	N	P-interaction	Effect (Genotype A)	Effect (Genotype B)	Design	Reference
ABCA1	rs2066714	n-6 PUFA diet	LDL-C change	79	0.117	TT: -0.34±0.06 mmol/L (n=51) \	CT+CC: -0.17±0.08 (n=28)	RCT crossover 4wk	E. Rajendiran, B. Lamarche, Y. She, V. Ramprasath, P. Eck, D. Brassard, I. Gigleux, E. Levy, A. Tremblay, P. Couture, J. D. House, P. J. H. Jones and C. Desmarchelier, A combination of single nucleotide polymorphisms is associated with the interindividual variability in the blood lipid response to dietary fatty acid consumption in a randomized clinical trial, Am J Clin Nutr, 2021, 114, 564-577.
ABCG5	rs6720173	n-6 PUFA diet	LDL-C change	79	0.174	GG: -0.23±0.05 mmol/L (n=55) \	CG: -0.37±0.08 (n=24)	RCT crossover 4wk	E. Rajendiran, B. Lamarche, Y. She, V. Ramprasath, P. Eck, D. Brassard, I. Gigleux, E. Levy, A. Tremblay, P. Couture, J. D. House, P. J. H. Jones and C. Desmarchelier, A combination of single nucleotide polymorphisms is associated with the interindividual variability in the blood lipid response to dietary fatty acid consumption in a randomized clinical trial, Am J Clin Nutr, 2021, 114, 564-577.
ADIPOQ	+45 T/G	EPA+DHA dose×age	Adiponectin	310	0.029	TT>58y: +22% (1.8g/d) P=0.008	TG/GG>58y: NS	RCT 12mo	A. Alsaleh, D. Crepostnaia, Z. Maniou, F. J. Lewis, W. L. Hall, T. A. Sanders, S. D. O'Dell and M. s. team, Adiponectin gene variant interacts with fish oil supplementation to influence serum adiponectin in older individuals, J Nutr, 2013, 143, 1021-1027.
ADIPOQ	-11391 G/A	EPA+DHA dose×age	Adiponectin	310	NS	No interaction with treatment×age	No interaction	RCT 12mo	A. Alsaleh, D. Crepostnaia, Z. Maniou, F. J. Lewis, W. L. Hall, T. A. Sanders, S. D. O'Dell and M. s. team, Adiponectin gene variant interacts with fish oil supplementation to influence serum adiponectin in older individuals, J Nutr, 2013, 143, 1021-1027.
ADIPOQ	+276 G/T	EPA+DHA dose×age	Adiponectin	310	NS	No interaction with treatment×age	No interaction	RCT 12mo	A. Alsaleh, D. Crepostnaia, Z. Maniou, F. J. Lewis, W. L. Hall, T. A. Sanders, S. D. O'Dell and M. s. team, Adiponectin gene variant interacts with fish oil supplementation to influence serum adiponectin in older individuals, J Nutr, 2013, 143, 1021-1027.
ADIPOQ	-11377 C/G	EPA+DHA dose×age	Adiponectin	310	NS	No interaction with treatment×age	No interaction	RCT 12mo	A. Alsaleh, D. Crepostnaia, Z. Maniou, F. J. Lewis, W. L. Hall, T. A. Sanders, S. D. O'Dell and M. s. team, Adiponectin gene variant interacts with fish oil supplementation to influence serum adiponectin in older individuals, J Nutr, 2013, 143, 1021-1027.
ADIPOQ	rs822393	PUFA diet	Adipo/leptin ratio	176	NS	CC: +0.57 P=0.03	CT/TT: +0.20 NS	RCT 3mo	R. Aller, O. Izaola, D. Primo Martin, J. A. Martinez and D. de Luis Roman, Dietary intervention with 2 different fat profiles; role of the rs822393 variant in metabolic parameter changes, Nutr Hosp, 2023, 40, 49-58.
ADIPOQ	rs822393	PUFA diet	Adiponectin	176	NS	CC: +20.1 ng/dl P=0.02	CT/TT: +6.8 ng/dl NS	RCT 3mo	R. Aller, O. Izaola, D. Primo Martin, J. A. Martinez and D. de Luis Roman, Dietary intervention with 2 different fat profiles; role of the rs822393 variant in metabolic parameter changes, Nutr Hosp, 2023, 40, 49-58.
ADIPOQ	rs822393	PUFA diet	DBP	176	NS	CC: -5.2 mmHg	CT/TT: -4.8 mmHg	RCT 3mo	R. Aller, O. Izaola, D. Primo Martin, J. A. Martinez and D. de Luis Roman, Dietary intervention with 2 different fat profiles; role of the rs822393 variant in metabolic parameter changes, Nutr Hosp, 2023, 40, 49-58.
ADIPOQ	rs822393	PUFA diet	Fat mass	176	NS	CC: -3.4 kg	CT/TT: -3.3 kg	RCT 3mo	R. Aller, O. Izaola, D. Primo Martin, J. A. Martinez and D. de Luis Roman, Dietary intervention with 2 different fat profiles; role of the rs822393 variant in metabolic parameter changes, Nutr Hosp, 2023, 40, 49-58.
ADIPOQ	rs822393	PUFA diet	HDL-C	176	NS	CC: +5.6 mg/dl P=0.01	CT/TT: +2.7 mg/dl NS	RCT 3mo	R. Aller, O. Izaola, D. Primo Martin, J. A. Martinez and D. de Luis Roman, Dietary intervention with 2 different fat profiles; role of the rs822393 variant in metabolic parameter changes, Nutr Hosp, 2023, 40, 49-58.
ADIPOQ	rs822393	PUFA diet	HOMA-IR	176	NS	CC: -1.7	CT/TT: -1.4	RCT 3mo	R. Aller, O. Izaola, D. Primo Martin, J. A. Martinez and D. de Luis Roman, Dietary intervention with 2 different fat profiles; role of the rs822393 variant in metabolic parameter changes, Nutr Hosp, 2023, 40, 49-58.
ADIPOQ	rs822393	PUFA diet	Insulin	176	NS	CC: -5.4 mU/L	CT/TT: -5.0 mU/L	RCT 3mo	R. Aller, O. Izaola, D. Primo Martin, J. A. Martinez and D. de Luis Roman, Dietary intervention with 2 different fat profiles; role of the rs822393 variant in metabolic parameter changes, Nutr Hosp, 2023, 40, 49-58.
ADIPOQ	rs822393	PUFA diet	LDL-C	176	NS	CC: -17.6 mg/dl	CT/TT: -17.0 mg/dl	RCT 3mo	R. Aller, O. Izaola, D. Primo Martin, J. A. Martinez and D. de Luis Roman, Dietary intervention with 2 different fat profiles; role of the rs822393 variant in metabolic parameter changes, Nutr Hosp, 2023, 40, 49-58.
ADIPOQ	rs822393	PUFA diet	SBP	176	NS	CC: -13.0 mmHg	CT/TT: -12.1 mmHg	RCT 3mo	R. Aller, O. Izaola, D. Primo Martin, J. A. Martinez and D. de Luis Roman, Dietary intervention with 2 different fat profiles; role of the rs822393 variant in metabolic parameter changes, Nutr Hosp, 2023, 40, 49-58.
ADIPOQ	rs822393	PUFA diet	TC	176	NS	CC: -20.1 mg/dl	CT/TT: -20.2 mg/dl	RCT 3mo	R. Aller, O. Izaola, D. Primo Martin, J. A. Martinez and D. de Luis Roman, Dietary intervention with 2 different fat profiles; role of the rs822393 variant in metabolic parameter changes, Nutr Hosp, 2023, 40, 49-58.
ADIPOQ	rs822393	PUFA diet	TG	176	NS	CC: -1.5 mg/dl	CT/TT: -1.4 mg/dl	RCT 3mo	R. Aller, O. Izaola, D. Primo Martin, J. A. Martinez and D. de Luis Roman, Dietary intervention with 2 different fat profiles; role of the rs822393 variant in metabolic parameter changes, Nutr Hosp, 2023, 40, 49-58.
ADIPOQ	rs822393	PUFA diet	Weight loss	176	NS	CC: -4.7 kg	CT/TT: -4.6 kg	RCT 3mo	R. Aller, O. Izaola, D. Primo Martin, J. A. Martinez and D. de Luis Roman, Dietary intervention with 2 different fat profiles; role of the rs822393 variant in metabolic parameter changes, Nutr Hosp, 2023, 40, 49-58.
ALOX5	Sp1 promoter (dd/d5/55)	Fish oil 2g EPA+1g DHA	15-HEPE	97	0.007	55: +~2.6 nmol/L	dd: NS; d5: +~1.3 nmol/L	RCT 6wk	C. B. Stephensen, P. Armstrong, J. W. Newman, T. L. Pedersen, J. Legault, G. U. Schuster, D. Kelley, S. Vikman, J. Hartiala, R. Nassir, M. F. Seldin and H. Allayee, ALOX5 gene variants affect eicosanoid production and response to fish oil supplementation, J Lipid Res, 2011, 52, 991-1003.
ALOX5	Sp1 promoter (dd/d5/55)	Fish oil 2g EPA+1g DHA	15-HETE	97	NS	Treatment P=0.48, Visit P=0.003	No gene×treatment int	RCT 6wk	C. B. Stephensen, P. Armstrong, J. W. Newman, T. L. Pedersen, J. Legault, G. U. Schuster, D. Kelley, S. Vikman, J. Hartiala, R. Nassir, M. F. Seldin and H. Allayee, ALOX5 gene variants affect eicosanoid production and response to fish oil supplementation, J Lipid Res, 2011, 52, 991-1003.
ALOX5	Sp1 promoter (dd/d5/55)	Fish oil 2g EPA+1g DHA	17-HDoHE	97	NS	Treatment P=0.14, Visit P=0.15	No gene×treatment int	RCT 6wk	C. B. Stephensen, P. Armstrong, J. W. Newman, T. L. Pedersen, J. Legault, G. U. Schuster, D. Kelley, S. Vikman, J. Hartiala, R. Nassir, M. F. Seldin and H. Allayee, ALOX5 gene variants affect eicosanoid production and response to fish oil supplementation, J Lipid Res, 2011, 52, 991-1003.
ALOX5	Sp1 promoter (dd/d5/55)	Fish oil 2g EPA+1g DHA	5,15-DiHETE	97	NS	Treatment P=0.38, Visit P=0.009	No gene×treatment int	RCT 6wk	C. B. Stephensen, P. Armstrong, J. W. Newman, T. L. Pedersen, J. Legault, G. U. Schuster, D. Kelley, S. Vikman, J. Hartiala, R. Nassir, M. F. Seldin and H. Allayee, ALOX5 gene variants affect eicosanoid production and response to fish oil supplementation, J Lipid Res, 2011, 52, 991-1003.
ALOX5	Sp1 promoter (dd/d5/55)	Fish oil 2g EPA+1g DHA	5-HEPE:5-HETE ratio	97	NS	Ratio increased with fish oil	No gene×treatment int	RCT 6wk	C. B. Stephensen, P. Armstrong, J. W. Newman, T. L. Pedersen, J. Legault, G. U. Schuster, D. Kelley, S. Vikman, J. Hartiala, R. Nassir, M. F. Seldin and H. Allayee, ALOX5 gene variants affect eicosanoid production and response to fish oil supplementation, J Lipid Res, 2011, 52, 991-1003.
ALOX5	Sp1 promoter (dd/d5/55)	Fish oil 2g EPA+1g DHA	5-HETE	97	NS	Treatment P=0.76, Visit P=0.013	No gene×treatment int	RCT 6wk	C. B. Stephensen, P. Armstrong, J. W. Newman, T. L. Pedersen, J. Legault, G. U. Schuster, D. Kelley, S. Vikman, J. Hartiala, R. Nassir, M. F. Seldin and H. Allayee, ALOX5 gene variants affect eicosanoid production and response to fish oil supplementation, J Lipid Res, 2011, 52, 991-1003.
ALOX5	Sp1 promoter (dd/d5/55)	Fish oil 2g EPA+1g DHA	5-oxo-ETE	97	0.033	55 fish: -0.8 nmol/L; 55 placebo: +0.5 nmol/L	dd/d5: Slight decreases both groups	RCT 6wk	C. B. Stephensen, P. Armstrong, J. W. Newman, T. L. Pedersen, J. Legault, G. U. Schuster, D. Kelley, S. Vikman, J. Hartiala, R. Nassir, M. F. Seldin and H. Allayee, ALOX5 gene variants affect eicosanoid production and response to fish oil supplementation, J Lipid Res, 2011, 52, 991-1003.
ALOX5	Sp1 promoter (dd/d5/55)	Fish oil 2g EPA+1g DHA	6-trans-LTB4	97	NS	Treatment P=0.65, Visit P=0.023	No gene×treatment int	RCT 6wk	C. B. Stephensen, P. Armstrong, J. W. Newman, T. L. Pedersen, J. Legault, G. U. Schuster, D. Kelley, S. Vikman, J. Hartiala, R. Nassir, M. F. Seldin and H. Allayee, ALOX5 gene variants affect eicosanoid production and response to fish oil supplementation, J Lipid Res, 2011, 52, 991-1003.
ALOX5	Sp1 promoter (dd/d5/55)	Fish oil 2g EPA+1g DHA	8,15-DiHETE	97	NS	Treatment P=0.63, Visit P=0.26	No gene×treatment int	RCT 6wk	C. B. Stephensen, P. Armstrong, J. W. Newman, T. L. Pedersen, J. Legault, G. U. Schuster, D. Kelley, S. Vikman, J. Hartiala, R. Nassir, M. F. Seldin and H. Allayee, ALOX5 gene variants affect eicosanoid production and response to fish oil supplementation, J Lipid Res, 2011, 52, 991-1003.
ALOX5	Sp1 promoter (dd/d5/55)	Fish oil 2g EPA+1g DHA	9-HETE	97	NS	Treatment P=0.86, Visit P=0.001	No gene×treatment int	RCT 6wk	C. B. Stephensen, P. Armstrong, J. W. Newman, T. L. Pedersen, J. Legault, G. U. Schuster, D. Kelley, S. Vikman, J. Hartiala, R. Nassir, M. F. Seldin and H. Allayee, ALOX5 gene variants affect eicosanoid production and response to fish oil supplementation, J Lipid Res, 2011, 52, 991-1003.
ALOX5	Sp1 promoter (dd/d5/55)	Fish oil 2g EPA+1g DHA	LTB4	97	NS	Treatment P=0.24, Visit P=0.11	No gene×treatment int	RCT 6wk	C. B. Stephensen, P. Armstrong, J. W. Newman, T. L. Pedersen, J. Legault, G. U. Schuster, D. Kelley, S. Vikman, J. Hartiala, R. Nassir, M. F. Seldin and H. Allayee, ALOX5 gene variants affect eicosanoid production and response to fish oil supplementation, J Lipid Res, 2011, 52, 991-1003.
ALOX5	Sp1 promoter (dd/d5/55)	Fish oil 2g EPA+1g DHA	LTB5	97	NS	Treatment P<0.001, Visit int P=0.019	No gene×treatment int	RCT 6wk	C. B. Stephensen, P. Armstrong, J. W. Newman, T. L. Pedersen, J. Legault, G. U. Schuster, D. Kelley, S. Vikman, J. Hartiala, R. Nassir, M. F. Seldin and H. Allayee, ALOX5 gene variants affect eicosanoid production and response to fish oil supplementation, J Lipid Res, 2011, 52, 991-1003.
ALOX5	Sp1 promoter (dd/d5/55)	Fish oil 2g EPA+1g DHA	LTD4	97	NS	Treatment P=0.089, Visit P=0.19	No gene×treatment int	RCT 6wk	C. B. Stephensen, P. Armstrong, J. W. Newman, T. L. Pedersen, J. Legault, G. U. Schuster, D. Kelley, S. Vikman, J. Hartiala, R. Nassir, M. F. Seldin and H. Allayee, ALOX5 gene variants affect eicosanoid production and response to fish oil supplementation, J Lipid Res, 2011, 52, 991-1003.
ALOX5	Sp1 promoter (dd/d5/55)	Fish oil 2g EPA+1g DHA	LTE4	97	NS	Treatment P=0.96, Visit P=0.56	No gene×treatment int	RCT 6wk	C. B. Stephensen, P. Armstrong, J. W. Newman, T. L. Pedersen, J. Legault, G. U. Schuster, D. Kelley, S. Vikman, J. Hartiala, R. Nassir, M. F. Seldin and H. Allayee, ALOX5 gene variants affect eicosanoid production and response to fish oil supplementation, J Lipid Res, 2011, 52, 991-1003.
ALOX5	Sp1 promoter (dd/d5/55)	Fish oil 2g EPA+1g DHA	Lipoxin A4	97	NS	Treatment P=0.51, Visit P=0.25	No gene×treatment int	RCT 6wk	C. B. Stephensen, P. Armstrong, J. W. Newman, T. L. Pedersen, J. Legault, G. U. Schuster, D. Kelley, S. Vikman, J. Hartiala, R. Nassir, M. F. Seldin and H. Allayee, ALOX5 gene variants affect eicosanoid production and response to fish oil supplementation, J Lipid Res, 2011, 52, 991-1003.
ALOX5 promoter	"dd" vs "d5" vs "55"	Fish oil 5g/d (2g EPA, 1g DHA)	HDL particle diameter (nm)	97 (dd=24 d5=48 55=25)	0.14	No gene×treatment interaction	FO increased HDL diameter overall (P=0.024) but no genotype interaction	6-wk RCT	P. Armstrong, D. S. Kelley, J. W. Newman, F. E. Staggers, Sr., J. Hartiala, H. Allayee and C. B. Stephensen, Arachidonate 5-lipoxygenase gene variants affect response to fish oil supplementation by healthy African Americans, J Nutr, 2012, 142, 1417-1428.
ALOX5 promoter	"dd" vs "d5" vs "55"	Fish oil 5g/d (2g EPA, 1g DHA)	LDL particles (nmol/L)	97 (dd=24 d5=48 55=25)	0.91	No gene×treatment interaction	Interaction tested but NS	6-wk RCT	P. Armstrong, D. S. Kelley, J. W. Newman, F. E. Staggers, Sr., J. Hartiala, H. Allayee and C. B. Stephensen, Arachidonate 5-lipoxygenase gene variants affect response to fish oil supplementation by healthy African Americans, J Nutr, 2012, 142, 1417-1428.
ALOX5 promoter	"dd" vs "d5" vs "55"	Fish oil 5g/d (2g EPA, 1g DHA)	Large HDL cholesterol (mmol/L)	97 (dd=24 d5=48 55=25)	0.39	No gene×treatment interaction	Interaction tested but NS	6-wk RCT	P. Armstrong, D. S. Kelley, J. W. Newman, F. E. Staggers, Sr., J. Hartiala, H. Allayee and C. B. Stephensen, Arachidonate 5-lipoxygenase gene variants affect response to fish oil supplementation by healthy African Americans, J Nutr, 2012, 142, 1417-1428.
ALOX5 promoter	"dd" vs "d5" vs "55"	Fish oil 5g/d (2g EPA, 1g DHA)	Large HDL particles (nmol/L)	97 (dd=24 d5=48 55=25)	0.60	No gene×treatment interaction	Interaction tested but NS	6-wk RCT	P. Armstrong, D. S. Kelley, J. W. Newman, F. E. Staggers, Sr., J. Hartiala, H. Allayee and C. B. Stephensen, Arachidonate 5-lipoxygenase gene variants affect response to fish oil supplementation by healthy African Americans, J Nutr, 2012, 142, 1417-1428.
ALOX5 promoter	"dd" vs "d5" vs "55"	Fish oil 5g/d (2g EPA, 1g DHA)	Large VLDL TG (mmol/L)	97 (dd=24 d5=48 55=25)	0.19	No gene×treatment interaction	Interaction tested but NS	6-wk RCT	P. Armstrong, D. S. Kelley, J. W. Newman, F. E. Staggers, Sr., J. Hartiala, H. Allayee and C. B. Stephensen, Arachidonate 5-lipoxygenase gene variants affect response to fish oil supplementation by healthy African Americans, J Nutr, 2012, 142, 1417-1428.
ALOX5 promoter	"dd" vs "d5" vs "55"	Fish oil 5g/d (2g EPA, 1g DHA)	Large VLDL particles (nmol/L)	97 (dd=24 d5=48 55=25)	0.33	No gene×treatment interaction	Interaction tested but NS	6-wk RCT	P. Armstrong, D. S. Kelley, J. W. Newman, F. E. Staggers, Sr., J. Hartiala, H. Allayee and C. B. Stephensen, Arachidonate 5-lipoxygenase gene variants affect response to fish oil supplementation by healthy African Americans, J Nutr, 2012, 142, 1417-1428.
ALOX5 promoter	"dd" vs "d5" vs "55"	Fish oil 5g/d (2g EPA, 1g DHA)	Small HDL cholesterol (mmol/L)	97 (dd=24 d5=48 55=25)	0.12	No gene×treatment interaction	FO decreased small HDL-c overall (P=0.0020) but no genotype difference	6-wk RCT	P. Armstrong, D. S. Kelley, J. W. Newman, F. E. Staggers, Sr., J. Hartiala, H. Allayee and C. B. Stephensen, Arachidonate 5-lipoxygenase gene variants affect response to fish oil supplementation by healthy African Americans, J Nutr, 2012, 142, 1417-1428.
ALOX5 promoter	"dd" vs "d5" vs "55"	Fish oil 5g/d (2g EPA, 1g DHA)	Small VLDL TG (mmol/L)	97 (dd=24 d5=48 55=25)	0.88	No gene×treatment interaction	Interaction tested but NS	6-wk RCT	P. Armstrong, D. S. Kelley, J. W. Newman, F. E. Staggers, Sr., J. Hartiala, H. Allayee and C. B. Stephensen, Arachidonate 5-lipoxygenase gene variants affect response to fish oil supplementation by healthy African Americans, J Nutr, 2012, 142, 1417-1428.
ALOX5 promoter	"dd" vs "d5" vs "55"	Fish oil 5g/d (2g EPA, 1g DHA)	Small VLDL particles (nmol/L)	97 (dd=24 d5=48 55=25)	0.81	No gene×treatment interaction	Interaction tested but NS	6-wk RCT	P. Armstrong, D. S. Kelley, J. W. Newman, F. E. Staggers, Sr., J. Hartiala, H. Allayee and C. B. Stephensen, Arachidonate 5-lipoxygenase gene variants affect response to fish oil supplementation by healthy African Americans, J Nutr, 2012, 142, 1417-1428.
ALOX5 promoter	"dd" vs "d5" vs "55"	Fish oil 5g/d (2g EPA, 1g DHA)	Total HDL cholesterol (mmol/L)	97 (dd=24 d5=48 55=25)	0.93	No gene×treatment interaction	Interaction tested but NS	6-wk RCT	P. Armstrong, D. S. Kelley, J. W. Newman, F. E. Staggers, Sr., J. Hartiala, H. Allayee and C. B. Stephensen, Arachidonate 5-lipoxygenase gene variants affect response to fish oil supplementation by healthy African Americans, J Nutr, 2012, 142, 1417-1428.
ALOX5 promoter	"dd" vs "d5" vs "55"	Fish oil 5g/d (2g EPA, 1g DHA)	Total LDL cholesterol (mmol/L)	97 (dd=24 d5=48 55=25)	0.91	No gene×treatment interaction	Interaction tested but NS	6-wk RCT	P. Armstrong, D. S. Kelley, J. W. Newman, F. E. Staggers, Sr., J. Hartiala, H. Allayee and C. B. Stephensen, Arachidonate 5-lipoxygenase gene variants affect response to fish oil supplementation by healthy African Americans, J Nutr, 2012, 142, 1417-1428.
APOA5	rs662799 (-1131T>C)	ω-6 PUFA-enriched Mediterranean diet	Adiponectin (ug/dl), 12-week change	362 obese	0.38	TT genotype: Δ +20.1±2.1 ng/dl (P=0.02); Baseline: 25.7±4.1 → 12-wk: 45.9±4.0 ug/dl	TC±CC genotype: Δ +21.9±2.0 ng/dl (P=0.01); Baseline: 25.0±3.1 → 12-wk: 46.9±4.1 ug/dl. No genotype difference	Single-arm intervention	D. de Luis, O. Izaola and D. Primo, APOA-5 genetic variant and a hypocaloric diet enriched in omega-6 fatty acids with Mediterranean pattern, Eur Rev Med Pharmacol Sci, 2024, 28, 2014-2023.
APOA5	rs662799 (-1131T>C)	ω-6 PUFA-enriched Mediterranean diet	Adiponectin/leptin ratio, 12-week change	362 obese	0.45	TT genotype: Δ +0.37±0.1 (P=0.02); Baseline: 0.33±0.2 → 12-wk: 0.72±0.3	TC±CC genotype: Δ +0.35±0.2 (P=0.01); Baseline: 0.31±0.3 → 12-wk: 0.75±0.2. No genotype difference	Single-arm intervention	D. de Luis, O. Izaola and D. Primo, APOA-5 genetic variant and a hypocaloric diet enriched in omega-6 fatty acids with Mediterranean pattern, Eur Rev Med Pharmacol Sci, 2024, 28, 2014-2023.
APOA5	rs662799 (-1131T>C)	ω-6 PUFA-enriched Mediterranean diet	BMI (kg/m²), 12-week change	362 obese	0.51	TT genotype: Δ -1.3±0.2 kg/m² (P=0.01); Baseline: 37.2±1.1 → 12-wk: 35.9±1.2 kg/m²	TC±CC genotype: Δ -1.2±0.1 kg/m² (P=0.02); Baseline: 37.1±1.1 → 12-wk: 35.8±0.9 kg/m². No genotype difference	Single-arm intervention	D. de Luis, O. Izaola and D. Primo, APOA-5 genetic variant and a hypocaloric diet enriched in omega-6 fatty acids with Mediterranean pattern, Eur Rev Med Pharmacol Sci, 2024, 28, 2014-2023.
APOA5	rs662799 (-1131T>C)	ω-6 PUFA-enriched Mediterranean diet	CRP (mg/L), 12-week change	362 obese	0.47	TT genotype: NS change (P=0.27); Baseline: 4.8±1.1 → 12-wk: 4.6±1.4 mg/L	TC±CC genotype: NS change (P=0.39); Baseline: 4.7±2.0 → 12-wk: 4.4±2.4 mg/L. No genotype difference	Single-arm intervention	D. de Luis, O. Izaola and D. Primo, APOA-5 genetic variant and a hypocaloric diet enriched in omega-6 fatty acids with Mediterranean pattern, Eur Rev Med Pharmacol Sci, 2024, 28, 2014-2023.
APOA5	rs662799 (-1131T>C)	ω-6 PUFA-enriched Mediterranean diet	Diastolic BP (mmHg), 12-week change	362 obese	NS	TT genotype: NS change (P=0.44); Baseline: 83.2±3.1 → 12-wk: 83.0±3.1 mmHg	TC±CC genotype: NS change (P=0.63); Baseline: 82.9±5.0 → 12-wk: 81.8±4.1 mmHg. No genotype difference	Single-arm intervention	D. de Luis, O. Izaola and D. Primo, APOA-5 genetic variant and a hypocaloric diet enriched in omega-6 fatty acids with Mediterranean pattern, Eur Rev Med Pharmacol Sci, 2024, 28, 2014-2023.
APOA5	rs662799 (-1131T>C)	ω-6 PUFA-enriched Mediterranean diet	Fat mass (kg), 12-week change	362 obese	0.50	TT genotype: Δ -3.8±0.8 kg (P=0.02); Baseline: 39.8±1.2 → 12-wk: 36.0±1.1 kg	TC±CC genotype: Δ -3.9±1.0 kg (P=0.02); Baseline: 40.1±1.4 → 12-wk: 36.2±1.3 kg. No genotype difference	Single-arm intervention	D. de Luis, O. Izaola and D. Primo, APOA-5 genetic variant and a hypocaloric diet enriched in omega-6 fatty acids with Mediterranean pattern, Eur Rev Med Pharmacol Sci, 2024, 28, 2014-2023.
APOA5	rs662799 (-1131T>C)	ω-6 PUFA-enriched Mediterranean diet	Glucose (mg/dl), 12-week change	362 obese	0.43	TT genotype: NS change (P=0.16); Baseline: 99.7±4.2 → 12-wk: 96.2±7.0 mg/dl	TC±CC genotype: NS change (P=0.28); Baseline: 98.7±4.0 → 12-wk: 96.3±3.1 mg/dl. No genotype difference	Single-arm intervention	D. de Luis, O. Izaola and D. Primo, APOA-5 genetic variant and a hypocaloric diet enriched in omega-6 fatty acids with Mediterranean pattern, Eur Rev Med Pharmacol Sci, 2024, 28, 2014-2023.
APOA5	rs662799 (-1131T>C)	ω-6 PUFA-enriched Mediterranean diet	HDL-cholesterol (mg/dl), 12-week change	362 obese	0.47	TT genotype: NS change (P=0.11); Baseline: 50.1±1.9 → 12-wk: 52.1±1.3 mg/dl	TC±CC genotype: NS change (P=0.51); Baseline: 53.2±2.0 → 12-wk: 52.7±1.9 mg/dl. No genotype difference	Single-arm intervention	D. de Luis, O. Izaola and D. Primo, APOA-5 genetic variant and a hypocaloric diet enriched in omega-6 fatty acids with Mediterranean pattern, Eur Rev Med Pharmacol Sci, 2024, 28, 2014-2023.
APOA5	rs662799 (-1131T>C)	ω-6 PUFA-enriched Mediterranean diet	LDL-cholesterol (mg/dl), 12-week change	362 obese	0.39	TT genotype: Δ -14.8±4.2 mg/dl (P=0.02); Baseline: 128.9±4.1 → 12-wk: 114.1±4.2 mg/dl	TC±CC genotype: Δ -21.1±3.1 mg/dl (P=0.01); Baseline: 130.9±4.0 → 12-wk: 109.8±3.1 mg/dl. No genotype difference	Single-arm intervention	D. de Luis, O. Izaola and D. Primo, APOA-5 genetic variant and a hypocaloric diet enriched in omega-6 fatty acids with Mediterranean pattern, Eur Rev Med Pharmacol Sci, 2024, 28, 2014-2023.
APOA5	rs662799 (-1131T>C)	ω-6 PUFA-enriched Mediterranean diet	Leptin (ng/dl), 12-week change	362 obese	0.38	TT genotype: Δ -12.1±5.0 ng/dl (P=0.01); Baseline: 80.1±4.6 → 12-wk: 68.2±3.1 ng/dl	TC±CC genotype: Δ -17.0±4.3 ng/dl (P=0.02); Baseline: 79.1±4.1 → 12-wk: 62.1±3.1 ng/dl. No genotype difference	Single-arm intervention	D. de Luis, O. Izaola and D. Primo, APOA-5 genetic variant and a hypocaloric diet enriched in omega-6 fatty acids with Mediterranean pattern, Eur Rev Med Pharmacol Sci, 2024, 28, 2014-2023.
APOA5	rs662799 (-1131T>C)	ω-6 PUFA-enriched Mediterranean diet	Resistin (ng/dl), 12-week change	362 obese	0.49	TT genotype: NS change (P=0.51); Baseline: 3.8±1.5 → 12-wk: 3.9±1.9 ng/dl	TC±CC genotype: NS change (P=0.32); Baseline: 4.0±2.0 → 12-wk: 3.9±1.8 ng/dl. No genotype difference	Single-arm intervention	D. de Luis, O. Izaola and D. Primo, APOA-5 genetic variant and a hypocaloric diet enriched in omega-6 fatty acids with Mediterranean pattern, Eur Rev Med Pharmacol Sci, 2024, 28, 2014-2023.
APOA5	rs662799 (-1131T>C)	ω-6 PUFA-enriched Mediterranean diet	Systolic BP (mmHg), 12-week change	362 obese	0.32	TT genotype: Δ -5.0±2.0 mmHg (P=0.02); Baseline: 129.1±2.1 → 12-wk: 124.2±2.2 mmHg	TC±CC genotype: Δ -3.9±2.0 mmHg (P=0.02); Baseline: 129.0±2.2 → 12-wk: 125.1±3.1 mmHg. No genotype difference	Single-arm intervention	D. de Luis, O. Izaola and D. Primo, APOA-5 genetic variant and a hypocaloric diet enriched in omega-6 fatty acids with Mediterranean pattern, Eur Rev Med Pharmacol Sci, 2024, 28, 2014-2023.
APOA5	rs662799 (-1131T>C)	ω-6 PUFA-enriched Mediterranean diet	Total cholesterol (mg/dl), 12-week change	362 obese	0.39	TT genotype: Δ -13.0±3.2 mg/dl (P=0.02); Baseline: 207.1±3.7 → 12-wk: 194.1±3.2 mg/dl	TC±CC genotype: Δ -14.5±3.1 mg/dl (P=0.03); Baseline: 209.9±3.3 → 12-wk: 195.4±3.1 mg/dl. No genotype difference	Single-arm intervention	D. de Luis, O. Izaola and D. Primo, APOA-5 genetic variant and a hypocaloric diet enriched in omega-6 fatty acids with Mediterranean pattern, Eur Rev Med Pharmacol Sci, 2024, 28, 2014-2023.
APOA5	rs662799 (-1131T>C)	ω-6 PUFA-enriched Mediterranean diet	Waist circumference (cm), 12-week change	362 obese	0.49	TT genotype: Δ -4.1±1.2 cm (P=0.03); Baseline: 112.2±4.2 → 12-wk: 108.1±2.1 cm	TC±CC genotype: Δ -4.8±1.1 cm (P=0.02); Baseline: 112.7±3.8 → 12-wk: 107.9±3.2 cm. No genotype difference	Single-arm intervention	D. de Luis, O. Izaola and D. Primo, APOA-5 genetic variant and a hypocaloric diet enriched in omega-6 fatty acids with Mediterranean pattern, Eur Rev Med Pharmacol Sci, 2024, 28, 2014-2023.
APOA5	rs662799 (-1131T>C)	ω-6 PUFA-enriched Mediterranean diet	Weight (kg), 12-week change	362 obese	0.61	TT genotype: Δ -4.4±2.0 kg (P=0.02); Baseline: 95.9±1.0 → 12-wk: 91.5±1.1 kg	TC±CC genotype: Δ -4.1±1.7 kg (P=0.01); Baseline: 96.0±2.0 → 12-wk: 91.5±1.1 kg. No genotype difference	Single-arm intervention	D. de Luis, O. Izaola and D. Primo, APOA-5 genetic variant and a hypocaloric diet enriched in omega-6 fatty acids with Mediterranean pattern, Eur Rev Med Pharmacol Sci, 2024, 28, 2014-2023.
APOA5	rs662799 (-1131T>C)	ω-6 PUFA-enriched Mediterranean diet (3.1→7.3 g/d)	HOMA-IR, 12-week change	362 obese	0.01	TT genotype: Δ -1.6±0.1 units (P=0.01); Baseline: 4.6±1.1 → 12-wk: 3.0±1.0	TC±CC genotype: Δ -0.3±0.2 units (P=0.12); Baseline: 3.1±0.9 → 12-wk: 2.8±1.2	Single-arm intervention	D. de Luis, O. Izaola and D. Primo, APOA-5 genetic variant and a hypocaloric diet enriched in omega-6 fatty acids with Mediterranean pattern, Eur Rev Med Pharmacol Sci, 2024, 28, 2014-2023.
APOA5	rs662799 (-1131T>C)	ω-6 PUFA-enriched Mediterranean diet (3.1→7.3 g/d)	Insulin (mUI/l), 12-week change	362 obese	0.03	TT genotype: Δ -3.5±0.2 UI/L (P=0.02); Baseline: 16.5±1.3 → 12-wk: 13.0±1.2 mUI/l	TC±CC genotype: Δ -1.2±0.6 UI/L (P=0.19); Baseline: 13.1±3.0 → 12-wk: 11.9±2.2 mUI/l	Single-arm intervention	D. de Luis, O. Izaola and D. Primo, APOA-5 genetic variant and a hypocaloric diet enriched in omega-6 fatty acids with Mediterranean pattern, Eur Rev Med Pharmacol Sci, 2024, 28, 2014-2023.
APOA5	rs662799 (-1131T>C)	ω-6 PUFA-enriched Mediterranean diet (3.1→7.3 g/d)	Triglycerides (mg/dl), 12-week change	362 obese	0.02	TT genotype (n=316): Δ -18.8±4.1 mg/dl (P=0.01); Baseline: 118.1±5.1 → 12-wk: 100.3±4.2 mg/dl	TC±CC genotype (n=46): Δ -3.7±3.0 mg/dl (P=0.31); Baseline: 131.9±4.2 → 12-wk: 123.9±3.1 mg/dl. Post-treatment difference P=0.02	Single-arm intervention	D. de Luis, O. Izaola and D. Primo, APOA-5 genetic variant and a hypocaloric diet enriched in omega-6 fatty acids with Mediterranean pattern, Eur Rev Med Pharmacol Sci, 2024, 28, 2014-2023.
APOB	Ins/Del	ω-3 PUFA	BMI	79	0.007	Del+High: BMI protective	Del+Low: Higher BMI	Cross-sect	M. Rafiee, G. Sotoudeh, M. Djalali, E. Alvandi, M. Eshraghian, F. Sojoudi and F. Koohdani, Dietary ω-3 polyunsaturated fatty acid intake modulates impact of Insertion/Deletion polymorphism of ApoB gene on obesity risk in type 2 diabetic patients, Nutrition, 2016, 32, 1110-1115.
APOB	Ins/Del	ω-3 PUFA	Obesity risk	79	0.002	Del+High: OR=0.46	Del+Low: OR=1.59	Cross-sect	M. Rafiee, G. Sotoudeh, M. Djalali, E. Alvandi, M. Eshraghian, F. Sojoudi and F. Koohdani, Dietary ω-3 polyunsaturated fatty acid intake modulates impact of Insertion/Deletion polymorphism of ApoB gene on obesity risk in type 2 diabetic patients, Nutrition, 2016, 32, 1110-1115.
APOC3	rs2854116	Cholesterol	NAFLD	464	0.031	TT+NAFLD had higher cholesterol intake (219.9±78.9 mg/1000kcal) than TT+non-NAFLD (185.4±73.3), P=0.005	TC and CC genotypes: no significant difference	Cross-sect	R. Yamamoto, Y. Takeshita, H. Tsujiguchi, T. Kannon, T. Sato, K. Hosomichi, K. Suzuki, Y. Kita, T. Tanaka, H. Goto, Y. Nakano, T. Yamashita, S. Kaneko, A. Tajima, H. Nakamura and T. Takamura, Nutrigenetic Interaction Between Apolipoprotein C3 Polymorphism and Fat Intake in People with Nonalcoholic Fatty Liver Disease, Curr Dev Nutr, 2023, 7, 100051.
APOC3	T-455C	DHA (C22:6)	High apo C-III	848	0.03	TT/TC: β=-0.14, OR=0.87 (95% CI: -0.29 to 0.01)	CC: Interaction β=0.35 (95% CI: 0.04 to 0.66)	Cross-sect	O. Olivieri, N. Martinelli, M. Sandri, A. Bassi, P. Guarini, E. Trabetti, F. Pizzolo, D. Girelli, S. Friso, P. F. Pignatti and R. Corrocher, Apolipoprotein C-III, n-3 polyunsaturated fatty acids, and "insulin-resistant" T-455C APOC3 gene polymorphism in heart disease patients: example of gene-diet interaction, Clin Chem, 2005, 51, 360-367.
APOC3	T-455C	DHA (C22:6)	High apo C-III (no lipid-lowering meds)	726	0.04	TT/TC: β=-0.21, OR=0.81 (95% CI: -0.38 to -0.04)	CC: Interaction β=0.44 (95% CI: 0.02 to 0.85)	Cross-sect	O. Olivieri, N. Martinelli, M. Sandri, A. Bassi, P. Guarini, E. Trabetti, F. Pizzolo, D. Girelli, S. Friso, P. F. Pignatti and R. Corrocher, Apolipoprotein C-III, n-3 polyunsaturated fatty acids, and "insulin-resistant" T-455C APOC3 gene polymorphism in heart disease patients: example of gene-diet interaction, Clin Chem, 2005, 51, 360-367.
APOC3	rs2854116	MUFAs	NAFLD	464	0.002	TT+NAFLD had higher MUFA intake (10.0±2.8%) than TT+non-NAFLD (8.3±2.2%), P<0.001	TC and CC genotypes: no significant difference	Cross-sect	R. Yamamoto, Y. Takeshita, H. Tsujiguchi, T. Kannon, T. Sato, K. Hosomichi, K. Suzuki, Y. Kita, T. Tanaka, H. Goto, Y. Nakano, T. Yamashita, S. Kaneko, A. Tajima, H. Nakamura and T. Takamura, Nutrigenetic Interaction Between Apolipoprotein C3 Polymorphism and Fat Intake in People with Nonalcoholic Fatty Liver Disease, Curr Dev Nutr, 2023, 7, 100051.
APOC3	rs2854116	PUFA	NAFLD	464	0.015	TT+NAFLD: 6.7±2.0% energy	TT+non-NAFLD: 5.9±1.4%	Cross-sect	R. Yamamoto, Y. Takeshita, H. Tsujiguchi, T. Kannon, T. Sato, K. Hosomichi, K. Suzuki, Y. Kita, T. Tanaka, H. Goto, Y. Nakano, T. Yamashita, S. Kaneko, A. Tajima, H. Nakamura and T. Takamura, Nutrigenetic Interaction Between Apolipoprotein C3 Polymorphism and Fat Intake in People with Nonalcoholic Fatty Liver Disease, Curr Dev Nutr, 2023, 7, 100051.
APOC3	T-455C	Total PUFA	High apo C-III	848	0.243	TT/TC: β=-0.33, OR=0.72 (95% CI: -0.48 to -0.19)	CC: Interaction β=0.21 (95% CI: -0.14 to 0.55)	Cross-sect	O. Olivieri, N. Martinelli, M. Sandri, A. Bassi, P. Guarini, E. Trabetti, F. Pizzolo, D. Girelli, S. Friso, P. F. Pignatti and R. Corrocher, Apolipoprotein C-III, n-3 polyunsaturated fatty acids, and "insulin-resistant" T-455C APOC3 gene polymorphism in heart disease patients: example of gene-diet interaction, Clin Chem, 2005, 51, 360-367.
APOC3	T-455C	Total PUFA	High apo C-III (no lipid-lowering meds)	726	0.214	TT/TC: β=-0.25, OR=0.78 (95% CI: -0.41 to -0.84)	CC: Interaction β=0.25 (95% CI: -0.15 to 0.65)	Cross-sect	O. Olivieri, N. Martinelli, M. Sandri, A. Bassi, P. Guarini, E. Trabetti, F. Pizzolo, D. Girelli, S. Friso, P. F. Pignatti and R. Corrocher, Apolipoprotein C-III, n-3 polyunsaturated fatty acids, and "insulin-resistant" T-455C APOC3 gene polymorphism in heart disease patients: example of gene-diet interaction, Clin Chem, 2005, 51, 360-367.
APOC3	rs2854116	Total fat	NAFLD	464	0.006	TT+NAFLD had higher fat intake (27.4±7.1%) than TT+non-NAFLD (23.7±5.8%), P=0.001	TC and CC genotypes: no significant difference between NAFLD and non-NAFLD	Cross-sect	R. Yamamoto, Y. Takeshita, H. Tsujiguchi, T. Kannon, T. Sato, K. Hosomichi, K. Suzuki, Y. Kita, T. Tanaka, H. Goto, Y. Nakano, T. Yamashita, S. Kaneko, A. Tajima, H. Nakamura and T. Takamura, Nutrigenetic Interaction Between Apolipoprotein C3 Polymorphism and Fat Intake in People with Nonalcoholic Fatty Liver Disease, Curr Dev Nutr, 2023, 7, 100051.
APOC3	rs2854116	Vegetable fat	NAFLD	464	0.017	TT+NAFLD had higher vegetable fat intake (14.8±4.4%) than TT+non-NAFLD (12.7±3.4%), P=0.002	TC and CC genotypes: no significant difference	Cross-sect	R. Yamamoto, Y. Takeshita, H. Tsujiguchi, T. Kannon, T. Sato, K. Hosomichi, K. Suzuki, Y. Kita, T. Tanaka, H. Goto, Y. Nakano, T. Yamashita, S. Kaneko, A. Tajima, H. Nakamura and T. Takamura, Nutrigenetic Interaction Between Apolipoprotein C3 Polymorphism and Fat Intake in People with Nonalcoholic Fatty Liver Disease, Curr Dev Nutr, 2023, 7, 100051.
APOC3	rs2854116	n-3 FA	NAFLD	464	0.038	TT+NAFLD: 1.4±0.5% energy	TT+non-NAFLD: 1.3±0.4%	Cross-sect	R. Yamamoto, Y. Takeshita, H. Tsujiguchi, T. Kannon, T. Sato, K. Hosomichi, K. Suzuki, Y. Kita, T. Tanaka, H. Goto, Y. Nakano, T. Yamashita, S. Kaneko, A. Tajima, H. Nakamura and T. Takamura, Nutrigenetic Interaction Between Apolipoprotein C3 Polymorphism and Fat Intake in People with Nonalcoholic Fatty Liver Disease, Curr Dev Nutr, 2023, 7, 100051.
APOC3	T-455C	n-3 PUFA	High apo C-III	848	0.065	TT/TC: β=-0.10, OR=0.90 (95% CI: -0.23 to 0.03)	CC: Interaction β=0.25 (95% CI: -0.02 to 0.52)	Cross-sect	O. Olivieri, N. Martinelli, M. Sandri, A. Bassi, P. Guarini, E. Trabetti, F. Pizzolo, D. Girelli, S. Friso, P. F. Pignatti and R. Corrocher, Apolipoprotein C-III, n-3 polyunsaturated fatty acids, and "insulin-resistant" T-455C APOC3 gene polymorphism in heart disease patients: example of gene-diet interaction, Clin Chem, 2005, 51, 360-367.
APOC3	T-455C	n-3 PUFA	High apo C-III (no lipid-lowering meds)	726	0.039	TT/TC: β=-0.17, OR=0.84 (95% CI: -0.33 to -0.02)	CC: Interaction β=0.39 (95% CI: 0.02 to 0.77)	Cross-sect	O. Olivieri, N. Martinelli, M. Sandri, A. Bassi, P. Guarini, E. Trabetti, F. Pizzolo, D. Girelli, S. Friso, P. F. Pignatti and R. Corrocher, Apolipoprotein C-III, n-3 polyunsaturated fatty acids, and "insulin-resistant" T-455C APOC3 gene polymorphism in heart disease patients: example of gene-diet interaction, Clin Chem, 2005, 51, 360-367.
APOC3	rs2854116	n-6 FA	NAFLD	464	0.025	TT+NAFLD: 5.3±1.6% energy	TT+non-NAFLD: 4.6±1.1%	Cross-sect	R. Yamamoto, Y. Takeshita, H. Tsujiguchi, T. Kannon, T. Sato, K. Hosomichi, K. Suzuki, Y. Kita, T. Tanaka, H. Goto, Y. Nakano, T. Yamashita, S. Kaneko, A. Tajima, H. Nakamura and T. Takamura, Nutrigenetic Interaction Between Apolipoprotein C3 Polymorphism and Fat Intake in People with Nonalcoholic Fatty Liver Disease, Curr Dev Nutr, 2023, 7, 100051.
APOE	E3/E3 vs E3/E4	DHA (3.7g/d)	LDL-C	38	0.089	E3/E3: -4.0%	E3/E4: +10.4%	RCT 16wk	E. Olano-Martin, E. Anil, M. J. Caslake, C. J. Packard, D. Bedford, G. Stewart, D. Peiris, C. M. Williams and A. M. Minihane, Contribution of apolipoprotein E genotype and docosahexaenoic acid to the LDL-cholesterol response to fish oil, Atherosclerosis, 2010, 209, 104-110.
APOE	E3/E3 vs E3/E4	DHA (3.7g/d)	TC	38	0.045	E3/E3: -0.7%	E3/E4: +3.8%	RCT 16wk	E. Olano-Martin, E. Anil, M. J. Caslake, C. J. Packard, D. Bedford, G. Stewart, D. Peiris, C. M. Williams and A. M. Minihane, Contribution of apolipoprotein E genotype and docosahexaenoic acid to the LDL-cholesterol response to fish oil, Atherosclerosis, 2010, 209, 104-110.
APOE	ε2/ε3/ε4 genotypes (rs429358, rs7412)	DHA (blood)	Dementia incidence	123235	0.04	Low-to-moderate APOE risk: HR 0.25 (95% CI 0.07-0.92)	High APOE risk: HR 0.98 (95% CI 0.29-3.28, NS)	Prospective cohort	Zhang Y, Li J, Liu S, Chen Q, Wang X, He S, Wei Y, Zou Y, Xu Y, Wang L, Chen H. Polyunsaturated fatty acids, APOE genotypes, and dementia incidence and mortality among hypertensive adults. J Prev Alzheimers Dis. 2025 Sep;12(8):100297. doi: 10.1016/j.tjpad.2025.100297. Epub 2025 Jul 22. PMID: 40695676; PMCID: PMC12413715.
APOE	ε2/ε3/ε4 genotypes (rs429358, rs7412)	DHA (blood)	Dementia mortality	123235	0.01	Low-to-moderate APOE risk: HR 0.01 (95% CI 0.00-0.11)	High APOE risk: HR 1.70 (95% CI 0.13-22.73, NS)	Prospective cohort	Zhang Y, Li J, Liu S, Chen Q, Wang X, He S, Wei Y, Zou Y, Xu Y, Wang L, Chen H. Polyunsaturated fatty acids, APOE genotypes, and dementia incidence and mortality among hypertensive adults. J Prev Alzheimers Dis. 2025 Sep;12(8):100297. doi: 10.1016/j.tjpad.2025.100297. Epub 2025 Jul 22. PMID: 40695676; PMCID: PMC12413715.
APOE	ε4 carrier	DHA (plasma %)	BVRT decline	1130	0.02	ε4-: NS	ε4+: β=0.061, p=0.01	Cohort 7y	C. Samieri, C. Feart, C. Proust-Lima, E. Peuchant, J. F. Dartigues, H. Amieva and P. Barberger-Gateau, omega-3 fatty acids and cognitive decline: modulation by ApoEepsilon4 allele and depression, Neurobiol Aging, 2011, 32, 2317 e2313-2322.
APOE	ε4 carrier	DHA 1.7g + EPA 0.6g/d	Cognitive score	86	0.45	No interaction	No interaction	RCT 18mo	N. Tomaszewski, X. He, V. Solomon, M. Lee, W. J. Mack, J. F. Quinn, M. N. Braskie and H. N. Yassine, Effect of APOE Genotype on Plasma Docosahexaenoic Acid (DHA), Eicosapentaenoic Acid, Arachidonic Acid, and Hippocampal Volume in the Alzheimer's Disease Cooperative Study-Sponsored DHA Clinical Trial, J Alzheimers Dis, 2020, 74, 975-990.
APOE	APOE4 alleles (0,1,2)	DHA 1.7g + EPA 0.6g/d	LINE-1 DNA methylation	63	NS	n-3 FA: Similar CpG1-4 change across all APOE4 genotypes	Placebo: Similar across genotypes	RCT 6mo AD	M. Karimi, I. Vedin, Y. Freund Levi, H. Basun, G. Faxen Irving, M. Eriksdotter, L. O. Wahlund, M. Schultzberg, E. Hjorth, T. Cederholm and J. Palmblad, DHA-rich n-3 fatty acid supplementation decreases DNA methylation in blood leukocytes: the OmegAD study, Am J Clin Nutr, 2017, 106, 1157-1165.
APOE	ε4 carrier	DHA 1.7g + EPA 0.6g/d	Plasma DHA/AA	275	0.03	ε4: +11.5%	Non-ε4: +24.3%	RCT 18mo	N. Tomaszewski, X. He, V. Solomon, M. Lee, W. J. Mack, J. F. Quinn, M. N. Braskie and H. N. Yassine, Effect of APOE Genotype on Plasma Docosahexaenoic Acid (DHA), Eicosapentaenoic Acid, Arachidonic Acid, and Hippocampal Volume in the Alzheimer's Disease Cooperative Study-Sponsored DHA Clinical Trial, J Alzheimers Dis, 2020, 74, 975-990.
APOE	ε4 carrier	DHA 1.7g + EPA 0.6g/d	Plasma EPA/AA	275	0.021	ε4: +14.8%	Non-ε4: +37.1%	RCT 18mo	N. Tomaszewski, X. He, V. Solomon, M. Lee, W. J. Mack, J. F. Quinn, M. N. Braskie and H. N. Yassine, Effect of APOE Genotype on Plasma Docosahexaenoic Acid (DHA), Eicosapentaenoic Acid, Arachidonic Acid, and Hippocampal Volume in the Alzheimer's Disease Cooperative Study-Sponsored DHA Clinical Trial, J Alzheimers Dis, 2020, 74, 975-990.
APOE	ε4 carrier	DHA 2g/d	Baseline CSF Aβ42	44	0.01	ε4 carriers: Lower CSF Aβ42 (150 pg/ml)	Non-ε4: Higher CSF Aβ42 (199 pg/ml)	Cross-sectional baseline	H. N. Yassine, V. Rawat, W. J. Mack, J. F. Quinn, K. Yurko-Mauro, E. Bailey-Hall, P. S. Aisen, H. C. Chui and L. S. Schneider, The effect of APOE genotype on the delivery of DHA to cerebrospinal fluid in Alzheimer's disease, Alzheimers Res Ther, 2016, 8, 25.
APOE	ε4 carrier	DHA 2g/d	CSF DHA	44	0.07	ε4 carriers (n=25): +37% (2.46→3.38 wt%)	Non-ε4 (n=4): +68% (2.21→3.71 wt%)	RCT 18mo	H. N. Yassine, V. Rawat, W. J. Mack, J. F. Quinn, K. Yurko-Mauro, E. Bailey-Hall, P. S. Aisen, H. C. Chui and L. S. Schneider, The effect of APOE genotype on the delivery of DHA to cerebrospinal fluid in Alzheimer's disease, Alzheimers Res Ther, 2016, 8, 25.
APOE	CSF Aβ42 tertiles	DHA 2g/d	CSF DHA at 18mo	29	0.01	Lowest Aβ42 tertile (<147 pg/ml): Lower CSF DHA	Higher Aβ42 tertiles: Higher CSF DHA	RCT 18mo	H. N. Yassine, V. Rawat, W. J. Mack, J. F. Quinn, K. Yurko-Mauro, E. Bailey-Hall, P. S. Aisen, H. C. Chui and L. S. Schneider, The effect of APOE genotype on the delivery of DHA to cerebrospinal fluid in Alzheimer's disease, Alzheimers Res Ther, 2016, 8, 25.
APOE	ε2/ε3/ε4	DHA 2g/d	CSF arachidonic acid	44	>0.10	DHA group: -2.27 wt% decrease	Placebo: -0.64 wt% decrease (p=0.002)	RCT 18mo	H. N. Yassine, V. Rawat, W. J. Mack, J. F. Quinn, K. Yurko-Mauro, E. Bailey-Hall, P. S. Aisen, H. C. Chui and L. S. Schneider, The effect of APOE genotype on the delivery of DHA to cerebrospinal fluid in Alzheimer's disease, Alzheimers Res Ther, 2016, 8, 25.
APOE	CSF Aβ42 tertiles	DHA 2g/d	CSF:plasma DHA ratio	29	0.05	Lowest Aβ42 tertile: Lower CSF:plasma ratio	Higher Aβ42 tertiles: Higher CSF:plasma ratio	RCT 18mo	H. N. Yassine, V. Rawat, W. J. Mack, J. F. Quinn, K. Yurko-Mauro, E. Bailey-Hall, P. S. Aisen, H. C. Chui and L. S. Schneider, The effect of APOE genotype on the delivery of DHA to cerebrospinal fluid in Alzheimer's disease, Alzheimers Res Ther, 2016, 8, 25.
APOE	ε4 carrier	DHA 2g/d	Plasma phospholipid DHA	195	0.8	ε4 carriers (n=119): +300% (3.18→9.82 wt%)	Non-ε4 (n=76): +300% (3.18→9.82 wt%)	RCT 18mo	H. N. Yassine, V. Rawat, W. J. Mack, J. F. Quinn, K. Yurko-Mauro, E. Bailey-Hall, P. S. Aisen, H. C. Chui and L. S. Schneider, The effect of APOE genotype on the delivery of DHA to cerebrospinal fluid in Alzheimer's disease, Alzheimers Res Ther, 2016, 8, 25.
APOE	ε2/ε3/ε4 alleles	Dietary ω-6:ω-3 PUFA ratio	HbA1c (%)	224 T2D patients	0.035	ε4 allele carriers: High ω-6:ω-3 ratio (>13:1): higher HbA1c% (slope P=0.012) vs ε2/ε3; Low ratio: no difference	ε2 & ε3 carriers: No effect of ω-6:ω-3 ratio on HbA1c. Baseline HbA1c%: ε2=6.6±0.6, ε3=7.8±2.0, ε4=7.2±1.7. Mean ω-6:ω-3: ε2=12:1, ε3=12:1, ε4=13:1	Cross-sectional, Mexican T2D	R. Torres-Valadez, O. Ramos-Lopez, K. J. Frias Delgadillo, A. Flores-Garcia, E. Rojas Carrillo, P. Aguiar-Garcia, J. A. Bernal Perez, E. Martinez-Lopez, J. A. Martinez and E. A. Zepeda-Carrillo, Impact of APOE Alleles-by-Diet Interactions on Glycemic and Lipid Features- A Cross-Sectional Study of a Cohort of Type 2 Diabetes Patients from Western Mexico: Implications for Personalized Medicine, Pha…
APOE	ε4 carrier	EPA (plasma %)	BVRT decline	1130	0.006	ε4-: β=0.001, p=0.93	ε4+: β=0.076, p=0.003	Cohort 7y	C. Samieri, C. Feart, C. Proust-Lima, E. Peuchant, J. F. Dartigues, H. Amieva and P. Barberger-Gateau, omega-3 fatty acids and cognitive decline: modulation by ApoEepsilon4 allele and depression, Neurobiol Aging, 2011, 32, 2317 e2313-2322.
APOE	ε3/ε4 vs others	EPA supplementation (2g/day)	Plasma 18-HEPE (ng/ml)	107	0.002	APOE3/4: median 0.67 ng/mL (lower)	APOE3/3: median 1.92 ng/mL (p=0.003); APOE2/3: median 1.79 ng/mL (p=0.019)	RCT 6mo	G. Sun, J. R. Davies, T. Mell, M. Harland, R. M. H. Saleh, A. D. Race, P. M. Loadman, E. A. Williams, A. M. Minihane and M. A. Hull, APOE genotype, eicosapentaenoic acid (EPA) supplementation and n-3 highly unsaturated fatty acid (HUFA) levels in patients with multiple colorectal polyps: A secondary analysis of the seAFOod polyp prevention trial, Prostaglandins Leukot. Essent. Fatty Acids, 2024, …
APOE	ε2/ε2, ε2/ε3, ε2/ε4, ε3/ε3, ε3/ε4, ε4/ε4	EPA supplementation (2g/day)	RBC DHA (% total fatty acids)	584	NS	APOE2/2: lower at baseline (p<0.01 vs APOE4/4)	APOE4/4: higher at baseline; genotype differences disappeared after EPA	RCT 6mo	G. Sun, J. R. Davies, T. Mell, M. Harland, R. M. H. Saleh, A. D. Race, P. M. Loadman, E. A. Williams, A. M. Minihane and M. A. Hull, APOE genotype, eicosapentaenoic acid (EPA) supplementation and n-3 highly unsaturated fatty acid (HUFA) levels in patients with multiple colorectal polyps: A secondary analysis of the seAFOod polyp prevention trial, Prostaglandins Leukot. Essent. Fatty Acids, 2024, …
APOE	ε2/ε2, ε2/ε3, ε2/ε4, ε3/ε3, ε3/ε4, ε4/ε4	EPA supplementation (2g/day)	RBC DPA (% total fatty acids)	584	NS	APOE2/2: lower at baseline	APOE4/4: higher at baseline; genotype differences disappeared after EPA	RCT 6mo	G. Sun, J. R. Davies, T. Mell, M. Harland, R. M. H. Saleh, A. D. Race, P. M. Loadman, E. A. Williams, A. M. Minihane and M. A. Hull, APOE genotype, eicosapentaenoic acid (EPA) supplementation and n-3 highly unsaturated fatty acid (HUFA) levels in patients with multiple colorectal polyps: A secondary analysis of the seAFOod polyp prevention trial, Prostaglandins Leukot. Essent. Fatty Acids, 2024, …
APOE	ε2/ε2, ε2/ε3, ε2/ε4, ε3/ε3, ε3/ε4, ε4/ε4	EPA supplementation (2g/day)	RBC EPA (% total fatty acids)	584	NS	APOE2/2: median 0.35% at baseline (lower than APOE3/3)	APOE4/4: median 0.66% at baseline (higher than APOE3/3); genotype differences disappeared after EPA	RCT 6mo	G. Sun, J. R. Davies, T. Mell, M. Harland, R. M. H. Saleh, A. D. Race, P. M. Loadman, E. A. Williams, A. M. Minihane and M. A. Hull, APOE genotype, eicosapentaenoic acid (EPA) supplementation and n-3 highly unsaturated fatty acid (HUFA) levels in patients with multiple colorectal polyps: A secondary analysis of the seAFOod polyp prevention trial, Prostaglandins Leukot. Essent. Fatty Acids, 2024, …
APOE	ε4 carrier	EPA+DHA supp	PL-EPA response	189	0.0228	ε4: 28% higher Δ than non-ε4 (6mo)	Non-ε4: reference	RCT 6mo	I. Loukil, E. C. Aguilera, A. Vachon, P. Léveillé and M. Plourde, Sex, Body Mass Index, and APOE4 Increase Plasma Phospholipid–Eicosapentaenoic Acid Response During an ω-3 Fatty Acid Supplementation: A Secondary Analysis, The Journal of Nutrition, 2024, 154, 1561-1570.
APOE	ε3e4 carrier	Erythrocyte DHA (% total FA)	Egocentric path integration (Supermarket)	46	0.04	e3e3 (n=24): No association (β=0.31, t=1.48, P=0.15)	e3e4 (n=22): Inverse assoc (β=-0.834, t=2.69, P=0.01)	Cross-sect	G. Coughlan, R. Larsen, M. Kim, D. White, R. Gillings, M. Irvine, A. Scholey, N. Cohen, C. Legido-Quigley, M. Hornberger and A. M. Minihane, APOE ε4 alters associations between docosahexaenoic acid and preclinical markers of Alzheimer's disease, Brain Commun, 2021, 3, fcab085.
APOE	ε4 dosage (rs7412, rs429358)	Fish oil supplements	All-cause dementia	445961	0.002	0 ε4 alleles: HR 0.86 (0.79-0.94)	1 ε4 allele: HR 0.92 (0.84-1.01); 2 ε4 alleles: HR 1.07 (0.90-1.28)	Cohort	H. Ma, T. Zhou, X. Li, Y. Heianza and L. Qi, Use of fish oil supplements is differently related to incidence of all-cause and vascular dementia among people with the distinct APOE epsilon4 dosage, Clin Nutr, 2022, 41, 731-736.
APOE	ε4 dosage (rs7412, rs429358)	Fish oil supplements	Alzheimer's disease	445961	0.17	No significant interaction	Overall: HR 0.99 (0.91-1.09)	Cohort	H. Ma, T. Zhou, X. Li, Y. Heianza and L. Qi, Use of fish oil supplements is differently related to incidence of all-cause and vascular dementia among people with the distinct APOE epsilon4 dosage, Clin Nutr, 2022, 41, 731-736.
APOE	ε4 dosage (rs7412, rs429358)	Fish oil supplements	Vascular dementia	445961	0.002	0 ε4 alleles: HR 0.78 (0.65-0.93)	1 ε4 allele: HR 0.81 (0.65-0.99); 2 ε4 alleles: HR 1.86 (1.23-2.80)	Cohort	H. Ma, T. Zhou, X. Li, Y. Heianza and L. Qi, Use of fish oil supplements is differently related to incidence of all-cause and vascular dementia among people with the distinct APOE epsilon4 dosage, Clin Nutr, 2022, 41, 731-736.
APOE	ε2/ε2, ε2/ε3 vs ε3/ε3, ε2/ε4 vs ε3/ε4, ε4/ε4	Fish oil supplements (n-3 PUFA)	All-cause dementia	215083	0.057	Normal risk (ε3/ε3 or ε2/ε4) + Fish oil: HR=0.85 (95% CI 0.76-0.96, p<0.01)	High risk (ε3/ε4 or ε4/ε4) + Fish oil: HR≈0.96 (95% CI ≈0.78-1.21, NS); Low risk (ε2/ε2 or ε2/ε3) + Fish oil: HR≈0.96 (95% CI ≈0.68-1.18, NS)	Prospective cohort	X. Liu, P. Zhuang, Y. Li, F. Wu, X. Wan, Y. Zhang and J. Jiao, Association of fish oil supplementation with risk of incident dementia: A prospective study of 215,083 older adults, Clin Nutr, 2022, 41, 589-598.
APOE	ε2/ε3/ε4 genotypes (rs429358, rs7412)	LA (blood)	All-cause mortality	123235	0.03	Low-to-moderate APOE risk: HR 0.83 (95% CI 0.78-0.89)	High APOE risk: HR 0.92 (95% CI 0.83-1.03, NS)	Prospective cohort	Zhang Y, Li J, Liu S, Chen Q, Wang X, He S, Wei Y, Zou Y, Xu Y, Wang L, Chen H. Polyunsaturated fatty acids, APOE genotypes, and dementia incidence and mortality among hypertensive adults. J Prev Alzheimers Dis. 2025 Sep;12(8):100297. doi: 10.1016/j.tjpad.2025.100297. Epub 2025 Jul 22. PMID: 40695676; PMCID: PMC12413715.
APOE	ε2/ε3/ε4 genotypes (rs429358, rs7412)	LA (blood)	Dementia incidence	123235	0.01	Low-to-moderate APOE risk: HR 0.68 (95% CI 0.58-0.80)	High APOE risk: HR 0.89 (95% CI 0.75-1.05, NS)	Prospective cohort	Zhang Y, Li J, Liu S, Chen Q, Wang X, He S, Wei Y, Zou Y, Xu Y, Wang L, Chen H. Polyunsaturated fatty acids, APOE genotypes, and dementia incidence and mortality among hypertensive adults. J Prev Alzheimers Dis. 2025 Sep;12(8):100297. doi: 10.1016/j.tjpad.2025.100297. Epub 2025 Jul 22. PMID: 40695676; PMCID: PMC12413715.
APOE	ε4 carrier	LC n-3 PUFA (per 1% energy)	Global cognitive decline	3360	0.023	ε4+: β=+0.024 (SE 0.010) per 1% energy (protective)	ε4-: β=-0.002 (SE 0.006), P=0.719 (NS)	Prospective cohort	X. Liu, T. Beck, K. Dhana, C. C. Tangney, P. Desai, K. Krueger, D. A. Evans and K. B. Rajan, Dietary fats and the APOE-e4 risk allele in relation to cognitive decline: a longitudinal investigation in a biracial population sample, J Nutr Health Aging, 2024, 28, 100211.
APOE	All genotypes (ε2/ε2 through ε4/ε4)	Omega-3 Index (RBC EPA+DHA %)	ApoB	136701	0.41 (ordinal); 0.011 (continuous)	ε2/ε2: 0.0%/1%↑ (NS); ε2/ε3: -0.2%/1%↑; ε2/ε4: -0.5%/1%↑	ε3/ε3: -0.6%/1%↑; ε3/ε4: -0.7%/1%↑; ε4/ε4: -1.0%/1%↑	Cross-sect	W. S. Harris, J. V. Pottala, D. L. Thiselton, S. A. Varvel, A. M. Baedke, T. D. Dayspring, G. R. Warnick and J. P. McConnell, Does APOE genotype modify the relations between serum lipid and erythrocyte omega-3 fatty acid levels?, J Cardiovasc Transl Res, 2014, 7, 526-532.
APOE	All genotypes (ε2/ε2 through ε4/ε4)	Omega-3 Index (RBC EPA+DHA %)	HDL-C	136701	0.42 (ordinal); 0.59 (continuous)	No interaction	Positive association across all genotypes (3-5%↑ per Omega-3 Index category)	Cross-sect	W. S. Harris, J. V. Pottala, D. L. Thiselton, S. A. Varvel, A. M. Baedke, T. D. Dayspring, G. R. Warnick and J. P. McConnell, Does APOE genotype modify the relations between serum lipid and erythrocyte omega-3 fatty acid levels?, J Cardiovasc Transl Res, 2014, 7, 526-532.
APOE	All genotypes (ε2/ε2 through ε4/ε4)	Omega-3 Index (RBC EPA+DHA %)	LDL-C	136701	0.43 (ordinal); 0.018 (continuous)	ε2/ε2: -0.3%/1%↑ (NS); ε2/ε3: -0.8%/1%↑; ε2/ε4: -1.0%/1%↑	ε3/ε3: -1.3%/1%↑; ε3/ε4: -1.3%/1%↑; ε4/ε4: -1.5%/1%↑	Cross-sect	W. S. Harris, J. V. Pottala, D. L. Thiselton, S. A. Varvel, A. M. Baedke, T. D. Dayspring, G. R. Warnick and J. P. McConnell, Does APOE genotype modify the relations between serum lipid and erythrocyte omega-3 fatty acid levels?, J Cardiovasc Transl Res, 2014, 7, 526-532.
APOE	All genotypes (ε2/ε2 through ε4/ε4)	Omega-3 Index (RBC EPA+DHA %)	LDL-P	136701	0.69 (ordinal); 0.067 (continuous)	No significant interaction	Favorable associations across all genotypes	Cross-sect	W. S. Harris, J. V. Pottala, D. L. Thiselton, S. A. Varvel, A. M. Baedke, T. D. Dayspring, G. R. Warnick and J. P. McConnell, Does APOE genotype modify the relations between serum lipid and erythrocyte omega-3 fatty acid levels?, J Cardiovasc Transl Res, 2014, 7, 526-532.
APOE	All genotypes (ε2/ε2 through ε4/ε4)	Omega-3 Index (RBC EPA+DHA %)	Triglycerides	136701	0.0002 (ordinal); 0.0004 (continuous)	Significant interaction: ε2/ε2: -12%/cat; ε2/ε3: -8%/cat; ε2/ε4: -13%/cat	ε3/ε3: -9%/cat; ε3/ε4: -10%/cat; ε4/ε4: -13%/cat	Cross-sect	W. S. Harris, J. V. Pottala, D. L. Thiselton, S. A. Varvel, A. M. Baedke, T. D. Dayspring, G. R. Warnick and J. P. McConnell, Does APOE genotype modify the relations between serum lipid and erythrocyte omega-3 fatty acid levels?, J Cardiovasc Transl Res, 2014, 7, 526-532.
APOE	E2/E3/E4	Plasma DHA	Medium HDL conc	2340	0.05	E2: -1.46 μmol/L per 1% DHA (P<0.001)	E3: -1.09 (P=0.004); E4: -1.48 (P<0.001)	Cross-sect	S. Liang, L. M. Steffen, B. T. Steffen, W. Guan, N. L. Weir, S. S. Rich, A. Manichaikul, J. D. Vargas and M. Y. Tsai, APOE genotype modifies the association between plasma omega-3 fatty acids and plasma lipids in the Multi-Ethnic Study of Atherosclerosis (MESA), Atherosclerosis, 2013, 228, 181-187.
APOE	E2/E3/E4	Plasma DHA	Small LDL conc	2340	0.01	E2: -2.99 nmol/L per 1% DHA (P=0.90)	E3: -3.37 (P=0.88); E4: +27.34 (P=0.25)	Cross-sect	S. Liang, L. M. Steffen, B. T. Steffen, W. Guan, N. L. Weir, S. S. Rich, A. Manichaikul, J. D. Vargas and M. Y. Tsai, APOE genotype modifies the association between plasma omega-3 fatty acids and plasma lipids in the Multi-Ethnic Study of Atherosclerosis (MESA), Atherosclerosis, 2013, 228, 181-187.
APOE	E2/E3/E4	Plasma EPA	HDL-C	2340	0.0002	E2: +0.074 mmol/L per 1% EPA (P=0.001)	E3: +0.026 (P=0.08); E4: -0.012 (P=0.32)	Cross-sect	S. Liang, L. M. Steffen, B. T. Steffen, W. Guan, N. L. Weir, S. S. Rich, A. Manichaikul, J. D. Vargas and M. Y. Tsai, APOE genotype modifies the association between plasma omega-3 fatty acids and plasma lipids in the Multi-Ethnic Study of Atherosclerosis (MESA), Atherosclerosis, 2013, 228, 181-187.
APOE	E2/E3/E4	Plasma EPA	Large HDL conc	2340	0.006	E2: +0.89 μmol/L per 1% EPA (P=0.001)	E3: +0.26 (P=0.09); E4: -0.01 (P=0.95)	Cross-sect	S. Liang, L. M. Steffen, B. T. Steffen, W. Guan, N. L. Weir, S. S. Rich, A. Manichaikul, J. D. Vargas and M. Y. Tsai, APOE genotype modifies the association between plasma omega-3 fatty acids and plasma lipids in the Multi-Ethnic Study of Atherosclerosis (MESA), Atherosclerosis, 2013, 228, 181-187.
APOE	E2/E3/E4	Plasma EPA	Mean HDL size	2340	0.03	E2: +0.04 nm per 1% EPA (P=0.22)	E3: 0.00 (P=0.92); E4: -0.04 (P=0.09)	Cross-sect	S. Liang, L. M. Steffen, B. T. Steffen, W. Guan, N. L. Weir, S. S. Rich, A. Manichaikul, J. D. Vargas and M. Y. Tsai, APOE genotype modifies the association between plasma omega-3 fatty acids and plasma lipids in the Multi-Ethnic Study of Atherosclerosis (MESA), Atherosclerosis, 2013, 228, 181-187.
APOE	E2/E3/E4	Plasma EPA	Mean LDL size	2340	0.05	E2: -0.01 nm per 1% EPA (P=0.85)	E3: -0.02 (P=0.41); E4: -0.07 (P=0.006)	Cross-sect	S. Liang, L. M. Steffen, B. T. Steffen, W. Guan, N. L. Weir, S. S. Rich, A. Manichaikul, J. D. Vargas and M. Y. Tsai, APOE genotype modifies the association between plasma omega-3 fatty acids and plasma lipids in the Multi-Ethnic Study of Atherosclerosis (MESA), Atherosclerosis, 2013, 228, 181-187.
APOE	E2/E3/E4	Plasma EPA	Small LDL conc	2340	0.04	E2: +35.06 nmol/L per 1% EPA (P=0.08)	E3: +34.61 (P=0.03); E4: +84.44 (P<0.001)	Cross-sect	S. Liang, L. M. Steffen, B. T. Steffen, W. Guan, N. L. Weir, S. S. Rich, A. Manichaikul, J. D. Vargas and M. Y. Tsai, APOE genotype modifies the association between plasma omega-3 fatty acids and plasma lipids in the Multi-Ethnic Study of Atherosclerosis (MESA), Atherosclerosis, 2013, 228, 181-187.
APOE	E2/E3/E4	Plasma EPA	Total HDL conc	2340	0.007	E2: +0.67 μmol/L per 1% EPA (P=0.03)	E3: +0.23 (P=0.38); E4: -0.28 (P=0.29)	Cross-sect	S. Liang, L. M. Steffen, B. T. Steffen, W. Guan, N. L. Weir, S. S. Rich, A. Manichaikul, J. D. Vargas and M. Y. Tsai, APOE genotype modifies the association between plasma omega-3 fatty acids and plasma lipids in the Multi-Ethnic Study of Atherosclerosis (MESA), Atherosclerosis, 2013, 228, 181-187.
APOE	ε3e4 carrier	Serum LPC DHA (μg/mL)	Left entorhinal volume (ratio of TIV)	30	NS	No main effect or interaction	No association	Cross-sect	G. Coughlan, R. Larsen, M. Kim, D. White, R. Gillings, M. Irvine, A. Scholey, N. Cohen, C. Legido-Quigley, M. Hornberger and A. M. Minihane, APOE ε4 alters associations between docosahexaenoic acid and preclinical markers of Alzheimer's disease, Brain Commun, 2021, 3, fcab085.
APOE	ε3e4 carrier	Serum LPC DHA (μg/mL)	Right hippocampal volume (ratio of TIV)	30	0.03	e3e3: + trend (NS)	e3e4: - trend (NS); LPC DHA × APOE int P=0.03 (t=2.24, ηp²=0.19)	Cross-sect	G. Coughlan, R. Larsen, M. Kim, D. White, R. Gillings, M. Irvine, A. Scholey, N. Cohen, C. Legido-Quigley, M. Hornberger and A. M. Minihane, APOE ε4 alters associations between docosahexaenoic acid and preclinical markers of Alzheimer's disease, Brain Commun, 2021, 3, fcab085.
APOE	ε3e4 carrier	Serum free DHA (μg/mL)	Left entorhinal volume (ratio of TIV)	53	0.03	e3e3 (n=38): +association (t=2.67, P=0.01)	e3e4 (n=15): No sig association	Cross-sect	G. Coughlan, R. Larsen, M. Kim, D. White, R. Gillings, M. Irvine, A. Scholey, N. Cohen, C. Legido-Quigley, M. Hornberger and A. M. Minihane, APOE ε4 alters associations between docosahexaenoic acid and preclinical markers of Alzheimer's disease, Brain Commun, 2021, 3, fcab085.
APOE	ε3e4 carrier	Serum free DHA (μg/mL)	Left hippocampal volume (ratio of TIV)	53	NS	e3e3: No sig association	e3e4: No sig association	Cross-sect	G. Coughlan, R. Larsen, M. Kim, D. White, R. Gillings, M. Irvine, A. Scholey, N. Cohen, C. Legido-Quigley, M. Hornberger and A. M. Minihane, APOE ε4 alters associations between docosahexaenoic acid and preclinical markers of Alzheimer's disease, Brain Commun, 2021, 3, fcab085.
APOE	ε3e4 carrier	Serum free DHA (μg/mL)	Right entorhinal volume (ratio of TIV)	53	0.05	e3e3 (n=38): +association (t=2.28, P=0.02)	e3e4 (n=15): No sig association	Cross-sect	G. Coughlan, R. Larsen, M. Kim, D. White, R. Gillings, M. Irvine, A. Scholey, N. Cohen, C. Legido-Quigley, M. Hornberger and A. M. Minihane, APOE ε4 alters associations between docosahexaenoic acid and preclinical markers of Alzheimer's disease, Brain Commun, 2021, 3, fcab085.
APOE	ε3e4 carrier	Serum free DHA (μg/mL)	Right hippocampal volume (ratio of TIV)	53	0.09	e3e3: Trend (t=1.72)	e3e4: No association	Cross-sect	G. Coughlan, R. Larsen, M. Kim, D. White, R. Gillings, M. Irvine, A. Scholey, N. Cohen, C. Legido-Quigley, M. Hornberger and A. M. Minihane, APOE ε4 alters associations between docosahexaenoic acid and preclinical markers of Alzheimer's disease, Brain Commun, 2021, 3, fcab085.
APOE	ε2/ε3/ε4 genotypes (rs429358, rs7412)	Total PUFA (blood)	Dementia incidence	123235	0.01	Low-to-moderate APOE risk (ε2/ε2, ε2/ε3, ε3/ε3, ε2/ε4): HR 0.74 (95% CI 0.64-0.84)	High APOE risk (ε3/ε4, ε4/ε4): HR 0.90 (95% CI 0.78-1.03, NS)	Prospective cohort	Zhang Y, Li J, Liu S, Chen Q, Wang X, He S, Wei Y, Zou Y, Xu Y, Wang L, Chen H. Polyunsaturated fatty acids, APOE genotypes, and dementia incidence and mortality among hypertensive adults. J Prev Alzheimers Dis. 2025 Sep;12(8):100297. doi: 10.1016/j.tjpad.2025.100297. Epub 2025 Jul 22. PMID: 40695676; PMCID: PMC12413715.
APOE	ε4 carrier	[¹³C]DHA 40mg	Cumulative β-oxidation (1-28d)	40	0.003	E4-: Slope m=0.05±0.01	E4+: Slope m=0.09±0.03 (+80%, P=0.03)	Tracer 28d	R. Chouinard-Watkins, C. Rioux-Perreault, M. Fortier, J. Tremblay-Mercier, Y. Zhang, P. Lawrence, M. C. Vohl, P. Perron, D. Lorrain, J. T. Brenna, S. C. Cunnane and M. Plourde, Disturbance in uniformly 13C-labelled DHA metabolism in elderly human subjects carrying the apoE epsilon4 allele, Br J Nutr, 2013, 110, 1751-1759.
APOE	ε4 carrier	[¹³C]DHA 40mg	Mean plasma [¹³C]DHA (1h-28d)	40	0.04	E4-: 0.96±0.11 nmol/ml	E4+: 0.66±0.14 nmol/ml (-31%)	Tracer 28d	R. Chouinard-Watkins, C. Rioux-Perreault, M. Fortier, J. Tremblay-Mercier, Y. Zhang, P. Lawrence, M. C. Vohl, P. Perron, D. Lorrain, J. T. Brenna, S. C. Cunnane and M. Plourde, Disturbance in uniformly 13C-labelled DHA metabolism in elderly human subjects carrying the apoE epsilon4 allele, Br J Nutr, 2013, 110, 1751-1759.
APOE	ε4 carrier	[¹³C]DHA 40mg	Plasma [¹³C]DHA half-life	38	NS	E4-: 4.5±0.4 days	E4+: 4.6±0.8 days	Tracer 28d	R. Chouinard-Watkins, C. Rioux-Perreault, M. Fortier, J. Tremblay-Mercier, Y. Zhang, P. Lawrence, M. C. Vohl, P. Perron, D. Lorrain, J. T. Brenna, S. C. Cunnane and M. Plourde, Disturbance in uniformly 13C-labelled DHA metabolism in elderly human subjects carrying the apoE epsilon4 allele, Br J Nutr, 2013, 110, 1751-1759.
APOE	ε4 carrier	[¹³C]DHA 40mg	Slope: plasma [¹³C]DHA vs ¹³CO₂	40	<0.001	E4-: β=0.06±0.01	E4+: β=0.13±0.03 (+117%, P<0.001)	Tracer 28d	R. Chouinard-Watkins, C. Rioux-Perreault, M. Fortier, J. Tremblay-Mercier, Y. Zhang, P. Lawrence, M. C. Vohl, P. Perron, D. Lorrain, J. T. Brenna, S. C. Cunnane and M. Plourde, Disturbance in uniformly 13C-labelled DHA metabolism in elderly human subjects carrying the apoE epsilon4 allele, Br J Nutr, 2013, 110, 1751-1759.
APOE	ε4 carrier	[¹³C]DHA 40mg	Whole-body [¹³C]DHA half-life	35	0.001	E4-: 140±28 days	E4+: 32±8 days (-77%)	Tracer 28d	R. Chouinard-Watkins, C. Rioux-Perreault, M. Fortier, J. Tremblay-Mercier, Y. Zhang, P. Lawrence, M. C. Vohl, P. Perron, D. Lorrain, J. T. Brenna, S. C. Cunnane and M. Plourde, Disturbance in uniformly 13C-labelled DHA metabolism in elderly human subjects carrying the apoE epsilon4 allele, Br J Nutr, 2013, 110, 1751-1759.
APOE	ε4 carrier	[¹³C]DHA 40mg	[¹³C]EPA retroconversion (peak 1d)	40	NS	E4-: 14.4±2.4 pmol/ml	E4+: 17.4±3.1 pmol/ml (1.2% of peak [¹³C]DHA)	Tracer 28d	R. Chouinard-Watkins, C. Rioux-Perreault, M. Fortier, J. Tremblay-Mercier, Y. Zhang, P. Lawrence, M. C. Vohl, P. Perron, D. Lorrain, J. T. Brenna, S. C. Cunnane and M. Plourde, Disturbance in uniformly 13C-labelled DHA metabolism in elderly human subjects carrying the apoE epsilon4 allele, Br J Nutr, 2013, 110, 1751-1759.
APOE	ε4 carrier	ω-3 FA 1g/d	Episodic memory	743	0.4	No interaction	No interaction	RCT 2y	C. M. Vyas, J. H. Kang, D. Mischoulon, N. R. Cook, C. F. Reynolds Iii, G. Chang, S. Mora, I. De Vivo, J. E. Manson and O. I. Okereke, Apolipoprotein E and Its Association With Cognitive Change and Modification of Treatment Effects of Vitamin D3 and Omega-3s on Cognitive Change: Results From the In-Clinic Subset of a Randomized Clinical Trial, J Gerontol A Biol Sci Med Sci, 2024, 79.
APOE	ε4 carrier	ω-3 FA 1g/d	Executive function/attention	743	0.37	No interaction	No interaction	RCT 2y	C. M. Vyas, J. H. Kang, D. Mischoulon, N. R. Cook, C. F. Reynolds Iii, G. Chang, S. Mora, I. De Vivo, J. E. Manson and O. I. Okereke, Apolipoprotein E and Its Association With Cognitive Change and Modification of Treatment Effects of Vitamin D3 and Omega-3s on Cognitive Change: Results From the In-Clinic Subset of a Randomized Clinical Trial, J Gerontol A Biol Sci Med Sci, 2024, 79.
APOE	ε4 carrier	ω-3 FA 1g/d	Global cognition	743	0.89	No interaction	No interaction	RCT 2y	C. M. Vyas, J. H. Kang, D. Mischoulon, N. R. Cook, C. F. Reynolds Iii, G. Chang, S. Mora, I. De Vivo, J. E. Manson and O. I. Okereke, Apolipoprotein E and Its Association With Cognitive Change and Modification of Treatment Effects of Vitamin D3 and Omega-3s on Cognitive Change: Results From the In-Clinic Subset of a Randomized Clinical Trial, J Gerontol A Biol Sci Med Sci, 2024, 79.
ARMS2	A69S (rs10490924)	DHA	CNV incidence	250	0.26	No significant interaction	No significant interaction	RCT	B. M. Merle, F. Richard, P. Benlian, N. Puche, C. Delcourt and E. H. Souied, CFH Y402H and ARMS2 A69S Polymorphisms and Oral Supplementation with Docosahexaenoic Acid in Neovascular Age-Related Macular Degeneration Patients: The NAT2 Study, PLoS One, 2015, 10, e0130816.
BTBD10/PTH	rs730414	n-3 (δ¹⁵N)	Body fat %	982	0.0004	TT: 41% (-5% Q1→Q4)	GG: 46% (+2% Q1→Q4)	Cross-sect	L. K. Vaughan, H. W. Wiener, S. Aslibekyan, D. B. Allison, P. J. Havel, K. L. Stanhope, D. M. O'Brien, S. E. Hopkins, D. J. Lemas, B. B. Boyer and H. K. Tiwari, Linkage and association analysis of obesity traits reveals novel loci and interactions with dietary n-3 fatty acids in an Alaska Native (Yup'ik) population, Metabolism, 2015, 64, 689-697.
CAV-1	rs3807992	PUFA (≥6% energy)	FPG ≥ 100 mg/dl	404	0.02	(AA+AG)+high PUFA: OR=0.06 (0.005-0.75)	GG or (AA+AG)+low PUFA: OR=1.0 (reference)	Cross-sect	F. Abaj and K. Mirzaei, Caveolin-1 genetic polymorphism interacts with PUFA to modulate metabolic syndrome risk, Br J Nutr, 2022, 127, 1281-1288.
CAV-1	rs3807992	PUFA (≥6% energy)	HOMA-IR ≥ 2.7	404	0.01	(AA+AG)+high PUFA: OR=0.22 (0.06-0.78)	GG or (AA+AG)+low PUFA: OR=1.0 (reference)	Cross-sect	F. Abaj and K. Mirzaei, Caveolin-1 genetic polymorphism interacts with PUFA to modulate metabolic syndrome risk, Br J Nutr, 2022, 127, 1281-1288.
CAV-1	rs3807992	PUFA (≥6% energy)	MetSyn	404	0.04	(AA+AG)+high PUFA: OR=0.207 (0.04-0.95)	GG or (AA+AG)+low PUFA: OR=1.0 (reference)	Cross-sect	F. Abaj and K. Mirzaei, Caveolin-1 genetic polymorphism interacts with PUFA to modulate metabolic syndrome risk, Br J Nutr, 2022, 127, 1281-1288.
CAV-1	rs3807992	PUFA (≥6% energy)	TG ≥ 150 mg/dl	404	0.02	(AA+AG)+high PUFA: OR=0.27 (0.05-0.8)	GG or (AA+AG)+low PUFA: OR=1.0 (reference)	Cross-sect	F. Abaj and K. Mirzaei, Caveolin-1 genetic polymorphism interacts with PUFA to modulate metabolic syndrome risk, Br J Nutr, 2022, 127, 1281-1288.
CCDC88A	rs1545554	RBC DHA	TMT B	1620	8.9e-06	β interaction = -0.6	See Table 4 in Annevelink et al. 2024 for detailed effects by genotype	Cross-sect	C. E. Annevelink, J. Westra, A. Sala-Vila, W. S. Harris, N. L. Tintle and G. C. Shearer, A Genome-Wide Interaction Study of Erythrocyte omega-3 Polyunsaturated Fatty Acid Species and Memory in the Framingham Heart Study Offspring Cohort, J Nutr, 2024, 154, 1640-1651.
CD36	rs1527483	DHA	Gut diversity	1286	0.0026	GG: +0.33 SD	AA/AG: No effect	Cohort	Z. Miao, G. D. Chen, S. Huo, Y. Fu, M. Y. Wu, F. Xu, Z. Jiang, J. Tang, W. Gou, C. Xiao, Y. P. Liu, Y. Y. Wu, T. Y. Sun, L. Sun, L. R. Shen, X. Lin, Y. M. Chen and J. S. Zheng, Interaction of n-3 polyunsaturated fatty acids with host CD36 genetic variant for gut microbiome and blood lipids in human cohorts, Clin Nutr, 2022, 41, 1724-1734.
CD36	rs1527483	DHA	HDL-C	2072	0.0041	GG: +0.05 mmol/L	AA/AG: No effect	Cohort	Z. Miao, G. D. Chen, S. Huo, Y. Fu, M. Y. Wu, F. Xu, Z. Jiang, J. Tang, W. Gou, C. Xiao, Y. P. Liu, Y. Y. Wu, T. Y. Sun, L. Sun, L. R. Shen, X. Lin, Y. M. Chen and J. S. Zheng, Interaction of n-3 polyunsaturated fatty acids with host CD36 genetic variant for gut microbiome and blood lipids in human cohorts, Clin Nutr, 2022, 41, 1724-1734.
CD36	rs1527483	EPA+DHA 2g/d	HDL-C Δ	150	0.582	No interaction	No interaction	RCT 6mo	J. S. Zheng, J. Chen, L. Wang, H. Yang, L. Fang, Y. Yu, L. Yuan, J. Feng, K. Li, J. Tang, M. Lin, C. Q. Lai and D. Li, Replication of a Gene-Diet Interaction at CD36, NOS3 and PPARG in Response to Omega-3 Fatty Acid Supplements on Blood Lipids: A Double-Blind Randomized Controlled Trial, EBioMedicine, 2018, 31, 150-156.; J. S. Zheng, Corrigendum to "Replication of a gene-diet interaction at CD36,…
CD36	rs1527483	EPA+DHA 2g/d	LDL-C Δ	150	0.228	No interaction	No interaction	RCT 6mo	J. S. Zheng, J. Chen, L. Wang, H. Yang, L. Fang, Y. Yu, L. Yuan, J. Feng, K. Li, J. Tang, M. Lin, C. Q. Lai and D. Li, Replication of a Gene-Diet Interaction at CD36, NOS3 and PPARG in Response to Omega-3 Fatty Acid Supplements on Blood Lipids: A Double-Blind Randomized Controlled Trial, EBioMedicine, 2018, 31, 150-156.; J. S. Zheng, Corrigendum to "Replication of a gene-diet interaction at CD36,…
CD36	rs1527483	EPA+DHA 2g/d	TC Δ	150	0.107	CC: -0.24	TT: -0.09	RCT 6mo	J. S. Zheng, J. Chen, L. Wang, H. Yang, L. Fang, Y. Yu, L. Yuan, J. Feng, K. Li, J. Tang, M. Lin, C. Q. Lai and D. Li, Replication of a Gene-Diet Interaction at CD36, NOS3 and PPARG in Response to Omega-3 Fatty Acid Supplements on Blood Lipids: A Double-Blind Randomized Controlled Trial, EBioMedicine, 2018, 31, 150-156.; J. S. Zheng, Corrigendum to "Replication of a gene-diet interaction at CD36,…
CD36	rs1527483	EPA+DHA 2g/d	TG Δ	150	0.048	CC: -0.32 mmol/L	TT: +0.05 mmol/L	RCT 6mo	J. S. Zheng, J. Chen, L. Wang, H. Yang, L. Fang, Y. Yu, L. Yuan, J. Feng, K. Li, J. Tang, M. Lin, C. Q. Lai and D. Li, Replication of a Gene-Diet Interaction at CD36, NOS3 and PPARG in Response to Omega-3 Fatty Acid Supplements on Blood Lipids: A Double-Blind Randomized Controlled Trial, EBioMedicine, 2018, 31, 150-156.; J. S. Zheng, Corrigendum to "Replication of a gene-diet interaction at CD36,…
CD36	rs1527483	EPA+DHA 2g/d×ω3	LDL-C Δ	150	0.031	CC+high ω3Δ: -0.39	TT+low ω3Δ: +0.02	RCT 6mo	J. S. Zheng, J. Chen, L. Wang, H. Yang, L. Fang, Y. Yu, L. Yuan, J. Feng, K. Li, J. Tang, M. Lin, C. Q. Lai and D. Li, Replication of a Gene-Diet Interaction at CD36, NOS3 and PPARG in Response to Omega-3 Fatty Acid Supplements on Blood Lipids: A Double-Blind Randomized Controlled Trial, EBioMedicine, 2018, 31, 150-156.; J. S. Zheng, Corrigendum to "Replication of a gene-diet interaction at CD36,…
CD36	rs1527483	EPA+DHA 2g/d×ω3	TC Δ	150	0.046	CC+high ω3Δ: -0.45	TT+low ω3Δ: +0.03	RCT 6mo	J. S. Zheng, J. Chen, L. Wang, H. Yang, L. Fang, Y. Yu, L. Yuan, J. Feng, K. Li, J. Tang, M. Lin, C. Q. Lai and D. Li, Replication of a Gene-Diet Interaction at CD36, NOS3 and PPARG in Response to Omega-3 Fatty Acid Supplements on Blood Lipids: A Double-Blind Randomized Controlled Trial, EBioMedicine, 2018, 31, 150-156.; J. S. Zheng, Corrigendum to "Replication of a gene-diet interaction at CD36,…
CD36	rs1527483	n-3 PUFA	HDL-C	2072	0.0048	GG: +5 mg/dL	AA/AG: No effect	Cohort	Z. Miao, G. D. Chen, S. Huo, Y. Fu, M. Y. Wu, F. Xu, Z. Jiang, J. Tang, W. Gou, C. Xiao, Y. P. Liu, Y. Y. Wu, T. Y. Sun, L. Sun, L. R. Shen, X. Lin, Y. M. Chen and J. S. Zheng, Interaction of n-3 polyunsaturated fatty acids with host CD36 genetic variant for gut microbiome and blood lipids in human cohorts, Clin Nutr, 2022, 41, 1724-1734.
CFH	Y402H (rs1061170)	DHA	CNV incidence	250	0.01	TT+DHA: 16.7% CNV	TT+placebo: 38.2% CNV; HR=0.14 (0.03-0.59), p=0.008	RCT	B. M. Merle, F. Richard, P. Benlian, N. Puche, C. Delcourt and E. H. Souied, CFH Y402H and ARMS2 A69S Polymorphisms and Oral Supplementation with Docosahexaenoic Acid in Neovascular Age-Related Macular Degeneration Patients: The NAT2 Study, PLoS One, 2015, 10, e0130816.
CPA6	rs1991429	RBC DHA	TMT A	1620	4.7e-06	β interaction = -0.12	See Table 4 in Annevelink et al. 2024 for detailed effects by genotype	Cross-sect	C. E. Annevelink, J. Westra, A. Sala-Vila, W. S. Harris, N. L. Tintle and G. C. Shearer, A Genome-Wide Interaction Study of Erythrocyte omega-3 Polyunsaturated Fatty Acid Species and Memory in the Framingham Heart Study Offspring Cohort, J Nutr, 2024, 154, 1640-1651.
CPA6	rs7463202	RBC DHA	TMT A	1620	7.5e-06	β interaction = -0.12	See Table 4 in Annevelink et al. 2024 for detailed effects by genotype	Cross-sect	C. E. Annevelink, J. Westra, A. Sala-Vila, W. S. Harris, N. L. Tintle and G. C. Shearer, A Genome-Wide Interaction Study of Erythrocyte omega-3 Polyunsaturated Fatty Acid Species and Memory in the Framingham Heart Study Offspring Cohort, J Nutr, 2024, 154, 1640-1651.
CPA6	rs10957451	RBC DHA	TMT A	1620	1.6e-06	β interaction = -0.13	See Table 4 in Annevelink et al. 2024 for detailed effects by genotype	Cross-sect	C. E. Annevelink, J. Westra, A. Sala-Vila, W. S. Harris, N. L. Tintle and G. C. Shearer, A Genome-Wide Interaction Study of Erythrocyte omega-3 Polyunsaturated Fatty Acid Species and Memory in the Framingham Heart Study Offspring Cohort, J Nutr, 2024, 154, 1640-1651.
CPA6	rs2553668	RBC DHA	TMT A	1620	5.2e-06	β interaction = -0.12	See Table 4 in Annevelink et al. 2024 for detailed effects by genotype	Cross-sect	C. E. Annevelink, J. Westra, A. Sala-Vila, W. S. Harris, N. L. Tintle and G. C. Shearer, A Genome-Wide Interaction Study of Erythrocyte omega-3 Polyunsaturated Fatty Acid Species and Memory in the Framingham Heart Study Offspring Cohort, J Nutr, 2024, 154, 1640-1651.
CPA6	rs10957451	RBC Omega-3 Index (EPA+DHA)	TMT A	1620	4.1e-06	β interaction = -0.12	See Table 4 in Annevelink et al. 2024 for detailed effects by genotype	Cross-sect	C. E. Annevelink, J. Westra, A. Sala-Vila, W. S. Harris, N. L. Tintle and G. C. Shearer, A Genome-Wide Interaction Study of Erythrocyte omega-3 Polyunsaturated Fatty Acid Species and Memory in the Framingham Heart Study Offspring Cohort, J Nutr, 2024, 154, 1640-1651.
CRY1	rs2287161	PUFA ≥18.8g/d	RMR per BMI (kcal/day/kg/m²)	377	0.009	CC+CG	GG	Cross-sectional	A. Mirzababaei, E. Daneshzad, F. Shiraseb, S. Pourreza, L. Setayesh, C. C. T. Clark, H. Tangestani, F. Abaj, H. Yarizadeh and K. Mirzaei, Variants of the cry 1 gene may influence the effect of fat intake on resting metabolic rate in women with overweight of obesity: a cross-sectional study, BMC Endocrine Disorders, 2021, 21, 196.
CRY1	rs2287161	PUFA ≥18.8g/d	RMR per BSA (kcal/day/m²)	377	0.07	CC+CG	GG	Cross-sectional	A. Mirzababaei, E. Daneshzad, F. Shiraseb, S. Pourreza, L. Setayesh, C. C. T. Clark, H. Tangestani, F. Abaj, H. Yarizadeh and K. Mirzaei, Variants of the cry 1 gene may influence the effect of fat intake on resting metabolic rate in women with overweight of obesity: a cross-sectional study, BMC Endocrine Disorders, 2021, 21, 196.
CRY1	rs2287161	PUFA ≥18.8g/d	RMR per kg (kcal/day/kg)	377	0.02	CC+CG	GG	Cross-sectional	A. Mirzababaei, E. Daneshzad, F. Shiraseb, S. Pourreza, L. Setayesh, C. C. T. Clark, H. Tangestani, F. Abaj, H. Yarizadeh and K. Mirzaei, Variants of the cry 1 gene may influence the effect of fat intake on resting metabolic rate in women with overweight of obesity: a cross-sectional study, BMC Endocrine Disorders, 2021, 21, 196.
CRY1	rs2287161	Total fat >30% energy	RMR deviation (%)	377	0.09	CC+CG	GG	Cross-sectional	A. Mirzababaei, E. Daneshzad, F. Shiraseb, S. Pourreza, L. Setayesh, C. C. T. Clark, H. Tangestani, F. Abaj, H. Yarizadeh and K. Mirzaei, Variants of the cry 1 gene may influence the effect of fat intake on resting metabolic rate in women with overweight of obesity: a cross-sectional study, BMC Endocrine Disorders, 2021, 21, 196.
CRY1	rs2287161	Total fat >30% energy	RMR per BSA (kcal/day/m²)	377	0.08	CC+CG	GG	Cross-sectional	A. Mirzababaei, E. Daneshzad, F. Shiraseb, S. Pourreza, L. Setayesh, C. C. T. Clark, H. Tangestani, F. Abaj, H. Yarizadeh and K. Mirzaei, Variants of the cry 1 gene may influence the effect of fat intake on resting metabolic rate in women with overweight of obesity: a cross-sectional study, BMC Endocrine Disorders, 2021, 21, 196.
CRY1	rs2287161	Total fat >30% energy	RMR per FFM (kcal/day/kg)	377	0.08	CC+CG	GG	Cross-sectional	A. Mirzababaei, E. Daneshzad, F. Shiraseb, S. Pourreza, L. Setayesh, C. C. T. Clark, H. Tangestani, F. Abaj, H. Yarizadeh and K. Mirzaei, Variants of the cry 1 gene may influence the effect of fat intake on resting metabolic rate in women with overweight of obesity: a cross-sectional study, BMC Endocrine Disorders, 2021, 21, 196.
CRY1	rs2287161	Total fat >30% energy	RMR per kg (kcal/day/kg)	377	0.02	CC+CG	GG	Cross-sectional	A. Mirzababaei, E. Daneshzad, F. Shiraseb, S. Pourreza, L. Setayesh, C. C. T. Clark, H. Tangestani, F. Abaj, H. Yarizadeh and K. Mirzaei, Variants of the cry 1 gene may influence the effect of fat intake on resting metabolic rate in women with overweight of obesity: a cross-sectional study, BMC Endocrine Disorders, 2021, 21, 196.
CYP4F3	rs4646904 (GG vs AG/AA)	DHA (>median)	Ulcerative colitis risk	139 cases 495 controls	0.50	GG: OR=0.80 (95% CI 0.48-1.35)	AG/AA: OR=0.85 (95% CI 0.43-1.66)	Nested case-control	A. N. Ananthakrishnan, H. Khalili, M. Song, L. M. Higuchi, P. Lochhead, J. M. Richter and A. T. Chan, Genetic Polymorphisms in Fatty Acid Metabolism Modify the Association Between Dietary n3: n6 Intake and Risk of Ulcerative Colitis: A Prospective Cohort Study, Inflamm Bowel Dis, 2017, 23, 1898-1904.
CYP4F3	rs4646904 (GG vs AG/AA)	EPA (>median)	Ulcerative colitis risk	139 cases 495 controls	0.20	GG: OR=0.74 (95% CI 0.44-1.26)	AG/AA: OR=1.10 (95% CI 0.56-2.19)	Nested case-control	A. N. Ananthakrishnan, H. Khalili, M. Song, L. M. Higuchi, P. Lochhead, J. M. Richter and A. T. Chan, Genetic Polymorphisms in Fatty Acid Metabolism Modify the Association Between Dietary n3: n6 Intake and Risk of Ulcerative Colitis: A Prospective Cohort Study, Inflamm Bowel Dis, 2017, 23, 1898-1904.
CYP4F3	rs4646904 (GG vs AG/AA)	Long-chain n3 PUFA (>median)	Ulcerative colitis risk	139 cases 495 controls	0.44	GG: OR=0.80 (95% CI 0.48-1.35)	AG/AA: OR=0.87 (95% CI 0.44-1.73)	Nested case-control	A. N. Ananthakrishnan, H. Khalili, M. Song, L. M. Higuchi, P. Lochhead, J. M. Richter and A. T. Chan, Genetic Polymorphisms in Fatty Acid Metabolism Modify the Association Between Dietary n3: n6 Intake and Risk of Ulcerative Colitis: A Prospective Cohort Study, Inflamm Bowel Dis, 2017, 23, 1898-1904.
CYP4F3	rs4646904 (GG vs AG/AA)	Total n3 PUFA (>median)	Ulcerative colitis risk	139 cases 495 controls	0.2	GG: OR=0.78 (95% CI 0.46-1.32)	AG/AA: OR=1.09 (95% CI 0.56-2.15)	Nested case-control	A. N. Ananthakrishnan, H. Khalili, M. Song, L. M. Higuchi, P. Lochhead, J. M. Richter and A. T. Chan, Genetic Polymorphisms in Fatty Acid Metabolism Modify the Association Between Dietary n3: n6 Intake and Risk of Ulcerative Colitis: A Prospective Cohort Study, Inflamm Bowel Dis, 2017, 23, 1898-1904.
CYP4F3	rs4646904 (GG vs AG/AA)	Total n6 PUFA (>median)	Ulcerative colitis risk	139 cases 495 controls	0.54	GG: OR=1.19 (95% CI 0.71-1.99)	AG/AA: OR=1.21 (95% CI 0.61-2.37)	Nested case-control	A. N. Ananthakrishnan, H. Khalili, M. Song, L. M. Higuchi, P. Lochhead, J. M. Richter and A. T. Chan, Genetic Polymorphisms in Fatty Acid Metabolism Modify the Association Between Dietary n3: n6 Intake and Risk of Ulcerative Colitis: A Prospective Cohort Study, Inflamm Bowel Dis, 2017, 23, 1898-1904.
CYP4F3	rs4646904 (GG vs AG/AA)	n3:n6 PUFA ratio (>median)	Crohn's disease risk	101 cases 495 controls	0.48	GG: OR=0.92 (95% CI 0.50-1.70)	AG/AA: OR=1.73 (95% CI 0.77-3.88)	Nested case-control	A. N. Ananthakrishnan, H. Khalili, M. Song, L. M. Higuchi, P. Lochhead, J. M. Richter and A. T. Chan, Genetic Polymorphisms in Fatty Acid Metabolism Modify the Association Between Dietary n3: n6 Intake and Risk of Ulcerative Colitis: A Prospective Cohort Study, Inflamm Bowel Dis, 2017, 23, 1898-1904.
CYP4F3	rs2683037 (TT vs AT/AA)	n3:n6 PUFA ratio (>median)	Crohn's disease risk	101 cases 495 controls	0.85	TT: OR=1.20 (95% CI 0.68-2.11)	AT/AA: OR=0.96 (95% CI 0.35-2.63)	Nested case-control	A. N. Ananthakrishnan, H. Khalili, M. Song, L. M. Higuchi, P. Lochhead, J. M. Richter and A. T. Chan, Genetic Polymorphisms in Fatty Acid Metabolism Modify the Association Between Dietary n3: n6 Intake and Risk of Ulcerative Colitis: A Prospective Cohort Study, Inflamm Bowel Dis, 2017, 23, 1898-1904.
CYP4F3	rs3794987 (GG vs GA/AA)	n3:n6 PUFA ratio (>median)	Crohn's disease risk	101 cases 495 controls	0.81	GG: OR=1.03 (95% CI 0.58-1.83)	GA/AA: OR=1.77 (95% CI 0.66-4.76)	Nested case-control	A. N. Ananthakrishnan, H. Khalili, M. Song, L. M. Higuchi, P. Lochhead, J. M. Richter and A. T. Chan, Genetic Polymorphisms in Fatty Acid Metabolism Modify the Association Between Dietary n3: n6 Intake and Risk of Ulcerative Colitis: A Prospective Cohort Study, Inflamm Bowel Dis, 2017, 23, 1898-1904.
CYP4F3	rs1290617 (GG vs GT/TT)	n3:n6 PUFA ratio (>median)	Crohn's disease risk	101 cases 495 controls	0.94	GG: OR=1.43 (95% CI 0.67-3.03)	GT/TT: OR=0.99 (95% CI 0.51-1.91)	Nested case-control	A. N. Ananthakrishnan, H. Khalili, M. Song, L. M. Higuchi, P. Lochhead, J. M. Richter and A. T. Chan, Genetic Polymorphisms in Fatty Acid Metabolism Modify the Association Between Dietary n3: n6 Intake and Risk of Ulcerative Colitis: A Prospective Cohort Study, Inflamm Bowel Dis, 2017, 23, 1898-1904.
CYP4F3	rs2683037 (TT vs AT/AA)	n3:n6 PUFA ratio (>median)	Ulcerative colitis risk	139 cases 495 controls	0.65	TT: OR=0.67 (95% CI 0.39-1.15)	AT/AA: OR=0.57 (95% CI 0.24-1.33)	Nested case-control	A. N. Ananthakrishnan, H. Khalili, M. Song, L. M. Higuchi, P. Lochhead, J. M. Richter and A. T. Chan, Genetic Polymorphisms in Fatty Acid Metabolism Modify the Association Between Dietary n3: n6 Intake and Risk of Ulcerative Colitis: A Prospective Cohort Study, Inflamm Bowel Dis, 2017, 23, 1898-1904.
CYP4F3	rs1290617 (GG vs GT/TT)	n3:n6 PUFA ratio (>median)	Ulcerative colitis risk	139 cases 495 controls	0.32	GG: OR=1.03 (95% CI 0.49-2.17)	GT/TT: OR=0.47 (95% CI 0.26-0.84)	Nested case-control	A. N. Ananthakrishnan, H. Khalili, M. Song, L. M. Higuchi, P. Lochhead, J. M. Richter and A. T. Chan, Genetic Polymorphisms in Fatty Acid Metabolism Modify the Association Between Dietary n3: n6 Intake and Risk of Ulcerative Colitis: A Prospective Cohort Study, Inflamm Bowel Dis, 2017, 23, 1898-1904.
CYP4F3	rs4646904 (GG vs AG/AA)	n3:n6 PUFA ratio (>median)	Ulcerative colitis risk	139 cases 495 controls	0.049	GG: OR=0.57 (95% CI 0.32-0.99)	AG/AA: OR=0.95 (95% CI 0.47-1.93)	Nested case-control	A. N. Ananthakrishnan, H. Khalili, M. Song, L. M. Higuchi, P. Lochhead, J. M. Richter and A. T. Chan, Genetic Polymorphisms in Fatty Acid Metabolism Modify the Association Between Dietary n3: n6 Intake and Risk of Ulcerative Colitis: A Prospective Cohort Study, Inflamm Bowel Dis, 2017, 23, 1898-1904.
CYP4F3	rs3794987 (GG vs GA/AA)	n3:n6 PUFA ratio (>median)	Ulcerative colitis risk	139 cases 495 controls	0.55	GG: OR=0.56 (95% CI 0.33-0.96)	GA/AA: OR=0.75 (95% CI 0.31-1.81)	Nested case-control	A. N. Ananthakrishnan, H. Khalili, M. Song, L. M. Higuchi, P. Lochhead, J. M. Richter and A. T. Chan, Genetic Polymorphisms in Fatty Acid Metabolism Modify the Association Between Dietary n3: n6 Intake and Risk of Ulcerative Colitis: A Prospective Cohort Study, Inflamm Bowel Dis, 2017, 23, 1898-1904.
DAB1	rs11206955	RBC EPA	TMT A	1620	3.8e-06	β interaction = -0.11	See Table 4 in Annevelink et al. 2024 for detailed effects by genotype	Cross-sect	C. E. Annevelink, J. Westra, A. Sala-Vila, W. S. Harris, N. L. Tintle and G. C. Shearer, A Genome-Wide Interaction Study of Erythrocyte omega-3 Polyunsaturated Fatty Acid Species and Memory in the Framingham Heart Study Offspring Cohort, J Nutr, 2024, 154, 1640-1651.
DAB1	rs12035887	RBC EPA	TMT A	1620	6.6e-06	β interaction = -0.11	See Table 4 in Annevelink et al. 2024 for detailed effects by genotype	Cross-sect	C. E. Annevelink, J. Westra, A. Sala-Vila, W. S. Harris, N. L. Tintle and G. C. Shearer, A Genome-Wide Interaction Study of Erythrocyte omega-3 Polyunsaturated Fatty Acid Species and Memory in the Framingham Heart Study Offspring Cohort, J Nutr, 2024, 154, 1640-1651.
DAGLA	rs1692120	Non-DHA omega-3	Atopic dermatitis	250040	>0.05	GG Q4: HR ~0.58 vs ref	GA/AA Q4: HR ~0.75 vs ref	Cohort 14.4y	R. Mao, X. Meng, T. Zhang, F. Wang, Y. Zhong and J. Li, Evaluating the Impact of Omega-3 Fatty Acids and Genetic Susceptibility on Atopic Dermatitis in Adults, Mol Nutr Food Res, 2025, 69, e70002.
DAGLA	rs1692120	Omega-6/omega-3 ratio	Atopic dermatitis	250040	>0.05	GG Q1: HR ~0.55 vs ref	GA/AA Q4: HR 1.0 (ref)	Cohort 14.4y	R. Mao, X. Meng, T. Zhang, F. Wang, Y. Zhong and J. Li, Evaluating the Impact of Omega-3 Fatty Acids and Genetic Susceptibility on Atopic Dermatitis in Adults, Mol Nutr Food Res, 2025, 69, e70002.
DAGLA	rs1692120	Plasma omega-3	Atopic dermatitis	250040	>0.05	GG Q4: HR ~0.62 vs ref	GA/AA Q4: HR ~0.75 vs ref	Cohort 14.4y	R. Mao, X. Meng, T. Zhang, F. Wang, Y. Zhong and J. Li, Evaluating the Impact of Omega-3 Fatty Acids and Genetic Susceptibility on Atopic Dermatitis in Adults, Mol Nutr Food Res, 2025, 69, e70002.
DLG2	rs1914203	RBC DPA	TMT A	1620	2.6e-06	β interaction = -0.19	See Table 4 in Annevelink et al. 2024 for detailed effects by genotype	Cross-sect	C. E. Annevelink, J. Westra, A. Sala-Vila, W. S. Harris, N. L. Tintle and G. C. Shearer, A Genome-Wide Interaction Study of Erythrocyte omega-3 Polyunsaturated Fatty Acid Species and Memory in the Framingham Heart Study Offspring Cohort, J Nutr, 2024, 154, 1640-1651.
EML6	rs6727776	RBC DHA	TMT A	1620	2.1e-06	β interaction = -0.14	See Table 4 in Annevelink et al. 2024 for detailed effects by genotype	Cross-sect	C. E. Annevelink, J. Westra, A. Sala-Vila, W. S. Harris, N. L. Tintle and G. C. Shearer, A Genome-Wide Interaction Study of Erythrocyte omega-3 Polyunsaturated Fatty Acid Species and Memory in the Framingham Heart Study Offspring Cohort, J Nutr, 2024, 154, 1640-1651.
EML6	rs10182181	RBC DHA	TMT A	1620	2.1e-06	β interaction = -0.12	See Table 4 in Annevelink et al. 2024 for detailed effects by genotype	Cross-sect	C. E. Annevelink, J. Westra, A. Sala-Vila, W. S. Harris, N. L. Tintle and G. C. Shearer, A Genome-Wide Interaction Study of Erythrocyte omega-3 Polyunsaturated Fatty Acid Species and Memory in the Framingham Heart Study Offspring Cohort, J Nutr, 2024, 154, 1640-1651.
EML6	rs6727776	RBC Omega-3 Index (EPA+DHA)	TMT A	1620	2.8e-06	β interaction = -0.13	See Table 4 in Annevelink et al. 2024 for detailed effects by genotype	Cross-sect	C. E. Annevelink, J. Westra, A. Sala-Vila, W. S. Harris, N. L. Tintle and G. C. Shearer, A Genome-Wide Interaction Study of Erythrocyte omega-3 Polyunsaturated Fatty Acid Species and Memory in the Framingham Heart Study Offspring Cohort, J Nutr, 2024, 154, 1640-1651.
EML6	rs10182181	RBC Omega-3 Index (EPA+DHA)	TMT A	1620	4.4e-06	β interaction = -0.11	See Table 4 in Annevelink et al. 2024 for detailed effects by genotype	Cross-sect	C. E. Annevelink, J. Westra, A. Sala-Vila, W. S. Harris, N. L. Tintle and G. C. Shearer, A Genome-Wide Interaction Study of Erythrocyte omega-3 Polyunsaturated Fatty Acid Species and Memory in the Framingham Heart Study Offspring Cohort, J Nutr, 2024, 154, 1640-1651.
FABP2	Ala54Thr	EPA 2g/d	ApoB change	46	0.538	Ala54: -18.5 mg/dL	Thr54: -11.8 mg/dL	Single-arm intervention study	H. Pishva, S. A. Mahboob, P. Mehdipour, M. R. Eshraghian, J. Mohammadi-Asl, S. Hosseini and F. Karimi, Fatty acid-binding protein-2 genotype influences lipid and lipoprotein response to eicosapentaenoic acid supplementation in hypertriglyceridemic subjects, Nutrition, 2010, 26, 1117-1121.
FABP2	Ala54Thr	EPA 2g/d	ApoCIII change	46	0.001	Ala54: -3.2 mg/dL (-22.8%)	Thr54: -6.3 mg/dL (-36.4%)	Single-arm intervention study	H. Pishva, S. A. Mahboob, P. Mehdipour, M. R. Eshraghian, J. Mohammadi-Asl, S. Hosseini and F. Karimi, Fatty acid-binding protein-2 genotype influences lipid and lipoprotein response to eicosapentaenoic acid supplementation in hypertriglyceridemic subjects, Nutrition, 2010, 26, 1117-1121.
FABP2	Ala54Thr	EPA 2g/d	ApoCIII-EPA r	46	0.014	Ala54: r=-0.33 (NS)	Thr54: r=-0.78 (P<0.001)	Single-arm intervention study	H. Pishva, S. A. Mahboob, P. Mehdipour, M. R. Eshraghian, J. Mohammadi-Asl, S. Hosseini and F. Karimi, Fatty acid-binding protein-2 genotype influences lipid and lipoprotein response to eicosapentaenoic acid supplementation in hypertriglyceridemic subjects, Nutrition, 2010, 26, 1117-1121.
FABP2	Ala54Thr	EPA 2g/d	HDL-C change	46	0.003	Ala54: +6.6 mg/dL (+17.6%)	Thr54: +10.4 mg/dL (+30.7%)	Single-arm intervention study	H. Pishva, S. A. Mahboob, P. Mehdipour, M. R. Eshraghian, J. Mohammadi-Asl, S. Hosseini and F. Karimi, Fatty acid-binding protein-2 genotype influences lipid and lipoprotein response to eicosapentaenoic acid supplementation in hypertriglyceridemic subjects, Nutrition, 2010, 26, 1117-1121.
FABP2	Ala54Thr	EPA 2g/d	LDL-C change	46	0.336	Ala54: -13.9 mg/dL	Thr54: -8.6 mg/dL	Single-arm intervention study	H. Pishva, S. A. Mahboob, P. Mehdipour, M. R. Eshraghian, J. Mohammadi-Asl, S. Hosseini and F. Karimi, Fatty acid-binding protein-2 genotype influences lipid and lipoprotein response to eicosapentaenoic acid supplementation in hypertriglyceridemic subjects, Nutrition, 2010, 26, 1117-1121.
FABP2	Ala54Thr	EPA 2g/d	Plasma EPA Δ	46	0.001	Ala54: +5.2-fold	Thr54: +61.8-fold	Single-arm intervention study	H. Pishva, S. A. Mahboob, P. Mehdipour, M. R. Eshraghian, J. Mohammadi-Asl, S. Hosseini and F. Karimi, Fatty acid-binding protein-2 genotype influences lipid and lipoprotein response to eicosapentaenoic acid supplementation in hypertriglyceridemic subjects, Nutrition, 2010, 26, 1117-1121.
FABP2	Ala54Thr	EPA 2g/d	TC change	46	0.702	Ala54: -19.0 mg/dL	Thr54: -28.8 mg/dL	Single-arm intervention study	H. Pishva, S. A. Mahboob, P. Mehdipour, M. R. Eshraghian, J. Mohammadi-Asl, S. Hosseini and F. Karimi, Fatty acid-binding protein-2 genotype influences lipid and lipoprotein response to eicosapentaenoic acid supplementation in hypertriglyceridemic subjects, Nutrition, 2010, 26, 1117-1121.
FABP2	Ala54Thr	EPA 2g/d	TG change	46	0.0001	Ala54: -64.1 mg/dL (-19.2%)	Thr54: -248.8 mg/dL (-60.5%)	Single-arm intervention study	H. Pishva, S. A. Mahboob, P. Mehdipour, M. R. Eshraghian, J. Mohammadi-Asl, S. Hosseini and F. Karimi, Fatty acid-binding protein-2 genotype influences lipid and lipoprotein response to eicosapentaenoic acid supplementation in hypertriglyceridemic subjects, Nutrition, 2010, 26, 1117-1121.
FABP2	Ala54Thr	EPA 2g/d	TG-EPA r diff	46	0.051	Ala54: r=-0.87	Thr54: r=-0.96	Single-arm intervention study	H. Pishva, S. A. Mahboob, P. Mehdipour, M. R. Eshraghian, J. Mohammadi-Asl, S. Hosseini and F. Karimi, Fatty acid-binding protein-2 genotype influences lipid and lipoprotein response to eicosapentaenoic acid supplementation in hypertriglyceridemic subjects, Nutrition, 2010, 26, 1117-1121.
FABP2	Ala54Thr	EPA 2g/d	VLDL change	46	0.0001	Ala54: -13.2 mg/dL (-20.0%)	Thr54: -49.8 mg/dL (-60.5%)	Single-arm intervention study	H. Pishva, S. A. Mahboob, P. Mehdipour, M. R. Eshraghian, J. Mohammadi-Asl, S. Hosseini and F. Karimi, Fatty acid-binding protein-2 genotype influences lipid and lipoprotein response to eicosapentaenoic acid supplementation in hypertriglyceridemic subjects, Nutrition, 2010, 26, 1117-1121.
FABP2	Ala54Thr	EPA 2g/d	VLDL-EPA r diff	46	0.051	Ala54: r=-0.87	Thr54: r=-0.96	Single-arm intervention study	H. Pishva, S. A. Mahboob, P. Mehdipour, M. R. Eshraghian, J. Mohammadi-Asl, S. Hosseini and F. Karimi, Fatty acid-binding protein-2 genotype influences lipid and lipoprotein response to eicosapentaenoic acid supplementation in hypertriglyceridemic subjects, Nutrition, 2010, 26, 1117-1121.
FADS1	rs174547 (T>C)	ALA	Serum ALA levels in T2DM patients	60	0.414	TC: 2.67±0.24%	TT: 2.46±0.21%	Case-control	Jarullah HH, Saleh ES. Influence of Fatty Acid Desaturase Enzyme-1 Gene (FADS-1) Polymorphism on Serum Polyunsaturated Fatty Acids Levels, Desaturase Enzymes, Lipid Profile, and Glycemic Control Parameters in Newly Diagnosed Diabetic Mellitus Patients. Int J Mol Sci. 2025 Apr 24;26(9):4015. doi: 10.3390/ijms26094015. PMID: 40362254; PMCID: PMC12071304.
FADS1	rs174537	ARA/DGLA ratio	FADS1 activity	117	NS	GG: 6-7 (Cauc)	GT/TT: 4-5 (Cauc)	RCT 6d	B. Dosso, C. M. K. Waits, K. N. Simms, S. Sergeant, D. C. Files, T. D. Howard, C. D. Langefeld, F. H. Chilton and E. Rahbar, Impact of rs174537 on Critically Ill Patients with Acute Lung Injury: A Secondary Analysis of the OMEGA Randomized Clinical Trial, Curr Dev Nutr, 2020, 4, nzaa147.
FADS1-FADS2	rs174570	DHA (food-sourced)	BMI change (~10y)	29674	0.003	T carriers: Higher DHA intake associated with greater BMI increase	Non-T carriers: Weaker association	Meta-analysis (pooled)	T. Huang, T. Wang, Y. Heianza, J. Wiggs, D. Sun, H. K. Choi, J. F. Chai, X. Sim, C. C. Khor, Y. Friedlander, A. T. Chan, G. Curhan, I. De Vivo, R. M. van Dam, C. K. Heng, C. Fuchs, L. R. Pasquale, J. M. Yuan, F. B. Hu, W. P. Koh and L. Qi, Fish and marine fatty acids intakes, the FADS genotypes and long-term weight gain: a prospective cohort study, BMJ Open, 2019, 9, e022877.
FADS1	rs174537	DHA 3.40g 2×/d	Circ DHA (AA)	27	0.002	GG placebo: ~1.5%	GT/TT placebo: ~4%	RCT 6d	B. Dosso, C. M. K. Waits, K. N. Simms, S. Sergeant, D. C. Files, T. D. Howard, C. D. Langefeld, F. H. Chilton and E. Rahbar, Impact of rs174537 on Critically Ill Patients with Acute Lung Injury: A Secondary Analysis of the OMEGA Randomized Clinical Trial, Curr Dev Nutr, 2020, 4, nzaa147.
FADS1	rs174537	DHA 3.40g 2×/d	Circ DHA (Cauc)	117	NS	Diet P<0.0001; No genotype difference	Omega-oil: 2% → 3.5%	RCT 6d	B. Dosso, C. M. K. Waits, K. N. Simms, S. Sergeant, D. C. Files, T. D. Howard, C. D. Langefeld, F. H. Chilton and E. Rahbar, Impact of rs174537 on Critically Ill Patients with Acute Lung Injury: A Secondary Analysis of the OMEGA Randomized Clinical Trial, Curr Dev Nutr, 2020, 4, nzaa147.
FADS1	rs174553	DHA 600mg/d vs placebo	RBC-PL-ARA at delivery	205	P<0.001	Placebo: NS diff by genotype (P=0.252)	DHA reduced ARA in minor allele carriers: A/A 12.97%, A/G 11.78% (P=0.038 vs A/A), G/G 10.09% (P<0.001 vs A/A)	RCT 26wk	S. A. Scholtz, E. H. Kerling, D. J. Shaddy, S. Li, J. M. Thodosoff, J. Colombo and S. E. Carlson, Docosahexaenoic acid (DHA) supplementation in pregnancy differentially modulates arachidonic acid and DHA status across FADS genotypes in pregnancy, Prostaglandins Leukot Essent Fatty Acids, 2015, 94, 29-33.
FADS1	rs174553	DHA 600mg/d vs placebo	RBC-PL-DHA at delivery	205	P<0.05	Placebo G/G: 3.78% (overall P=0.018; vs A/A P=0.005)	DHA G/G: 7.35% (P=0.954, NS) - eliminated genotype gap	RCT 26wk	S. A. Scholtz, E. H. Kerling, D. J. Shaddy, S. Li, J. M. Thodosoff, J. Colombo and S. E. Carlson, Docosahexaenoic acid (DHA) supplementation in pregnancy differentially modulates arachidonic acid and DHA status across FADS genotypes in pregnancy, Prostaglandins Leukot Essent Fatty Acids, 2015, 94, 29-33.
FADS1	rs174537	DPA (EPA metab)	Circ DPA	144	NS	Diet P<0.0001 both races; No genotype difference	Omega-oil: 0.5% → 0.9%	RCT 6d	B. Dosso, C. M. K. Waits, K. N. Simms, S. Sergeant, D. C. Files, T. D. Howard, C. D. Langefeld, F. H. Chilton and E. Rahbar, Impact of rs174537 on Critically Ill Patients with Acute Lung Injury: A Secondary Analysis of the OMEGA Randomized Clinical Trial, Curr Dev Nutr, 2020, 4, nzaa147.
FADS1	rs174550	Dietary LA	BMI	59	0.997	TT: 25.6→25.6 kg/m²	CC: 24.7→24.7 kg/m²	RCT 4wk	M. A. Lankinen, A. Fauland, B. I. Shimizu, J. Agren, C. E. Wheelock, M. Laakso, U. Schwab and J. Pihlajamaki, Inflammatory response to dietary linoleic acid depends on FADS1 genotype, Am J Clin Nutr, 2019, 109, 165-175.
FADS1	rs174550	Dietary LA	D5D activity (CE)	59	0.004	TT: Slight increase	CC: +35% increase (P<0.01)	RCT 4wk	M. A. Lankinen, A. Fauland, B. I. Shimizu, J. Agren, C. E. Wheelock, M. Laakso, U. Schwab and J. Pihlajamaki, Inflammatory response to dietary linoleic acid depends on FADS1 genotype, Am J Clin Nutr, 2019, 109, 165-175.
FADS1	rs174550	Dietary LA	Diastolic BP	59	0.166	TT: 82→82 mmHg	CC: 82→81 mmHg	RCT 4wk	M. A. Lankinen, A. Fauland, B. I. Shimizu, J. Agren, C. E. Wheelock, M. Laakso, U. Schwab and J. Pihlajamaki, Inflammatory response to dietary linoleic acid depends on FADS1 genotype, Am J Clin Nutr, 2019, 109, 165-175.
FADS1	rs174550	Dietary LA	HDL-C	59	0.612	TT: 1.4→1.4 mmol/L	CC: 1.4→1.4 mmol/L	RCT 4wk	M. A. Lankinen, A. Fauland, B. I. Shimizu, J. Agren, C. E. Wheelock, M. Laakso, U. Schwab and J. Pihlajamaki, Inflammatory response to dietary linoleic acid depends on FADS1 genotype, Am J Clin Nutr, 2019, 109, 165-175.
FADS1	rs174550	Dietary LA	LDL-C	59	0.732	TT: 3.2→3.0 mmol/L	CC: 3.4→3.1 mmol/L	RCT 4wk	M. A. Lankinen, A. Fauland, B. I. Shimizu, J. Agren, C. E. Wheelock, M. Laakso, U. Schwab and J. Pihlajamaki, Inflammatory response to dietary linoleic acid depends on FADS1 genotype, Am J Clin Nutr, 2019, 109, 165-175.
FADS1	rs174550	Dietary LA	Plasma CE AA%	59	0.003	TT: -5% (~7.3→6.9 mol%, P<0.05)	CC: -20% (~5.2→4.2 mol%, P<0.001)	RCT 4wk	M. A. Lankinen, A. Fauland, B. I. Shimizu, J. Agren, C. E. Wheelock, M. Laakso, U. Schwab and J. Pihlajamaki, Inflammatory response to dietary linoleic acid depends on FADS1 genotype, Am J Clin Nutr, 2019, 109, 165-175.
FADS1	rs174550	Dietary LA	Plasma PL AA%	59	0.014	TT: No change (~10 mol%)	CC: -10% (~8.5→7.7 mol%, P<0.001)	RCT 4wk	M. A. Lankinen, A. Fauland, B. I. Shimizu, J. Agren, C. E. Wheelock, M. Laakso, U. Schwab and J. Pihlajamaki, Inflammatory response to dietary linoleic acid depends on FADS1 genotype, Am J Clin Nutr, 2019, 109, 165-175.
FADS1	rs174550	Dietary LA	Plasma insulin	59	0.703	TT: 7.5→7.7 mU/L	CC: 7.8→7.8 mU/L	RCT 4wk	M. A. Lankinen, A. Fauland, B. I. Shimizu, J. Agren, C. E. Wheelock, M. Laakso, U. Schwab and J. Pihlajamaki, Inflammatory response to dietary linoleic acid depends on FADS1 genotype, Am J Clin Nutr, 2019, 109, 165-175.
FADS1	rs174550	Dietary LA	Systolic BP	59	0.99	TT: 128→126 mmHg	CC: 127→125 mmHg	RCT 4wk	M. A. Lankinen, A. Fauland, B. I. Shimizu, J. Agren, C. E. Wheelock, M. Laakso, U. Schwab and J. Pihlajamaki, Inflammatory response to dietary linoleic acid depends on FADS1 genotype, Am J Clin Nutr, 2019, 109, 165-175.
FADS1	rs174550	Dietary LA	Total cholesterol	59	0.371	TT: 5.2→5.1 mmol/L	CC: 5.5→5.2 mmol/L	RCT 4wk	M. A. Lankinen, A. Fauland, B. I. Shimizu, J. Agren, C. E. Wheelock, M. Laakso, U. Schwab and J. Pihlajamaki, Inflammatory response to dietary linoleic acid depends on FADS1 genotype, Am J Clin Nutr, 2019, 109, 165-175.
FADS1	rs174550	Dietary LA	Triglycerides	59	0.625	TT: 1.2→1.2 mmol/L	CC: 1.4→1.5 mmol/L	RCT 4wk	M. A. Lankinen, A. Fauland, B. I. Shimizu, J. Agren, C. E. Wheelock, M. Laakso, U. Schwab and J. Pihlajamaki, Inflammatory response to dietary linoleic acid depends on FADS1 genotype, Am J Clin Nutr, 2019, 109, 165-175.
FADS1	rs174550	Dietary LA	Waist circumference	59	0.952	TT: 94.4→94.3 cm	CC: 93.4→93.3 cm	RCT 4wk	M. A. Lankinen, A. Fauland, B. I. Shimizu, J. Agren, C. E. Wheelock, M. Laakso, U. Schwab and J. Pihlajamaki, Inflammatory response to dietary linoleic acid depends on FADS1 genotype, Am J Clin Nutr, 2019, 109, 165-175.
FADS1	rs174550	Dietary LA	Weight	59	0.799	TT: 80.8→80.8 kg	CC: 79.1→79.2 kg	RCT 4wk	M. A. Lankinen, A. Fauland, B. I. Shimizu, J. Agren, C. E. Wheelock, M. Laakso, U. Schwab and J. Pihlajamaki, Inflammatory response to dietary linoleic acid depends on FADS1 genotype, Am J Clin Nutr, 2019, 109, 165-175.
FADS1	rs174550	Dietary LA	hsCRP	59	0.026	TT: -42% (trend, P=0.088)	CC: +42% (trend, P=0.084)	RCT 4wk	M. A. Lankinen, A. Fauland, B. I. Shimizu, J. Agren, C. E. Wheelock, M. Laakso, U. Schwab and J. Pihlajamaki, Inflammatory response to dietary linoleic acid depends on FADS1 genotype, Am J Clin Nutr, 2019, 109, 165-175.
FADS1	rs174550 (TT/CC)	Dietary LA (30-50ml sunflower oil/d)	Plasma glucose	59	0.008	TT: No change (5.6→5.6 mmol/L)	CC: -1.8% (5.7→5.6 mmol/L, P=0.001)	RCT 4wk	M. A. Lankinen, A. Fauland, B. I. Shimizu, J. Agren, C. E. Wheelock, M. Laakso, U. Schwab and J. Pihlajamaki, Inflammatory response to dietary linoleic acid depends on FADS1 genotype, Am J Clin Nutr, 2019, 109, 165-175.
FADS1-FADS2	rs174570	EPA (food-sourced)	BMI change (~10y)	29674	0.01	T carriers: Higher EPA intake associated with greater BMI increase	Non-T carriers: Weaker association	Meta-analysis (pooled)	T. Huang, T. Wang, Y. Heianza, J. Wiggs, D. Sun, H. K. Choi, J. F. Chai, X. Sim, C. C. Khor, Y. Friedlander, A. T. Chan, G. Curhan, I. De Vivo, R. M. van Dam, C. K. Heng, C. Fuchs, L. R. Pasquale, J. M. Yuan, F. B. Hu, W. P. Koh and L. Qi, Fish and marine fatty acids intakes, the FADS genotypes and long-term weight gain: a prospective cohort study, BMJ Open, 2019, 9, e022877.
FADS1	rs174537	EPA 6.84g 2×/d	Circ EPA	144	NS	Diet P<0.0001 both races; No genotype difference	Omega-oil: ~4.5% by d6	RCT 6d	B. Dosso, C. M. K. Waits, K. N. Simms, S. Sergeant, D. C. Files, T. D. Howard, C. D. Langefeld, F. H. Chilton and E. Rahbar, Impact of rs174537 on Critically Ill Patients with Acute Lung Injury: A Secondary Analysis of the OMEGA Randomized Clinical Trial, Curr Dev Nutr, 2020, 4, nzaa147.
FADS1	rs174547	EPA+DHA 1.5g/d	O3I%	76	0.064	CC: +0.7±2.7%	TT: +3.1±2.2%	RCT 4mo	S. D. Reyes-Perez, K. Gonzalez-Becerra, E. Barron-Cabrera, J. F. Munoz-Valle, J. Armendariz-Borunda and E. Martinez-Lopez, FADS1 Genetic Variant and Omega-3 Supplementation Are Associated with Changes in Fatty Acid Composition in Red Blood Cells of Subjects with Obesity, Nutrients, 2024, 16.
FADS1	rs174547	EPA+DHA 1.5g/d	RBC AA%	76	0.012	CC: -2.3±3.5%	TT: +2.5±1.0%	RCT 4mo	S. D. Reyes-Perez, K. Gonzalez-Becerra, E. Barron-Cabrera, J. F. Munoz-Valle, J. Armendariz-Borunda and E. Martinez-Lopez, FADS1 Genetic Variant and Omega-3 Supplementation Are Associated with Changes in Fatty Acid Composition in Red Blood Cells of Subjects with Obesity, Nutrients, 2024, 16.
FADS1	rs174547	EPA+DHA 1.5g/d	RBC DHA%	76	0.284	CC: +0.9±2.5%	TT: +2.7±2.2%	RCT 4mo	S. D. Reyes-Perez, K. Gonzalez-Becerra, E. Barron-Cabrera, J. F. Munoz-Valle, J. Armendariz-Borunda and E. Martinez-Lopez, FADS1 Genetic Variant and Omega-3 Supplementation Are Associated with Changes in Fatty Acid Composition in Red Blood Cells of Subjects with Obesity, Nutrients, 2024, 16.
FADS1	rs174547	EPA+DHA 1.5g/d	RBC EPA%	76	0.003	CC: -0.2±0.4%	TT: +0.4±0.1%	RCT 4mo	S. D. Reyes-Perez, K. Gonzalez-Becerra, E. Barron-Cabrera, J. F. Munoz-Valle, J. Armendariz-Borunda and E. Martinez-Lopez, FADS1 Genetic Variant and Omega-3 Supplementation Are Associated with Changes in Fatty Acid Composition in Red Blood Cells of Subjects with Obesity, Nutrients, 2024, 16.
FADS1	rs174547	EPA+DHA 1.5g/d	RBC LA%	76	0.001	CC: -1.8±1.5%	TT: +1.7±1.2%	RCT 4mo	S. D. Reyes-Perez, K. Gonzalez-Becerra, E. Barron-Cabrera, J. F. Munoz-Valle, J. Armendariz-Borunda and E. Martinez-Lopez, FADS1 Genetic Variant and Omega-3 Supplementation Are Associated with Changes in Fatty Acid Composition in Red Blood Cells of Subjects with Obesity, Nutrients, 2024, 16.
FADS1	rs174547	EPA+DHA 1.5g/d	RBC MUFA%	76	0.001	CC: +3.2±8.7%	TT: -13.5±3.5%	RCT 4mo	S. D. Reyes-Perez, K. Gonzalez-Becerra, E. Barron-Cabrera, J. F. Munoz-Valle, J. Armendariz-Borunda and E. Martinez-Lopez, FADS1 Genetic Variant and Omega-3 Supplementation Are Associated with Changes in Fatty Acid Composition in Red Blood Cells of Subjects with Obesity, Nutrients, 2024, 16.
FADS1	rs174547	EPA+DHA 1.5g/d	RBC PUFA%	76	0.001	CC: -2.1±5.0%	TT: +9.2±3.4%	RCT 4mo	S. D. Reyes-Perez, K. Gonzalez-Becerra, E. Barron-Cabrera, J. F. Munoz-Valle, J. Armendariz-Borunda and E. Martinez-Lopez, FADS1 Genetic Variant and Omega-3 Supplementation Are Associated with Changes in Fatty Acid Composition in Red Blood Cells of Subjects with Obesity, Nutrients, 2024, 16.
FADS1	rs174547	EPA+DHA 1.5g/d	RBC SFA%	76	0.001	CC: -1.1±4.2%	TT: +4.3±1.5%	RCT 4mo	S. D. Reyes-Perez, K. Gonzalez-Becerra, E. Barron-Cabrera, J. F. Munoz-Valle, J. Armendariz-Borunda and E. Martinez-Lopez, FADS1 Genetic Variant and Omega-3 Supplementation Are Associated with Changes in Fatty Acid Composition in Red Blood Cells of Subjects with Obesity, Nutrients, 2024, 16.
FADS1	rs174547	EPA+DHA 1.5g/d	RBC n-3%	76	0.026	CC: +2.1±1.7%	TT: +4.9±2.6%	RCT 4mo	S. D. Reyes-Perez, K. Gonzalez-Becerra, E. Barron-Cabrera, J. F. Munoz-Valle, J. Armendariz-Borunda and E. Martinez-Lopez, FADS1 Genetic Variant and Omega-3 Supplementation Are Associated with Changes in Fatty Acid Composition in Red Blood Cells of Subjects with Obesity, Nutrients, 2024, 16.
FADS1	rs174547	EPA+DHA 1.5g/d	RBC n-6%	76	0.001	CC: -4.2±4.9%	TT: +4.0±0.9%	RCT 4mo	S. D. Reyes-Perez, K. Gonzalez-Becerra, E. Barron-Cabrera, J. F. Munoz-Valle, J. Armendariz-Borunda and E. Martinez-Lopez, FADS1 Genetic Variant and Omega-3 Supplementation Are Associated with Changes in Fatty Acid Composition in Red Blood Cells of Subjects with Obesity, Nutrients, 2024, 16.
FADS1	rs174537	Endogenous n-3 HUFA	DHA levels (ng/mL)	493	0.03	TT: 12.08 ng/mL (homozygous major/ancestral)	GG: 14.11 ng/mL (homozygous minor/derived); -15.80% difference (95% CI: -25.07, -5.38)	Cross-sectional	Blomquist SA, Albrecht JH, Hallmark B, Klimentidis YC, Garcia LA, Mandarino LJ, Coletta DK, Chilton FH. The influence of FADS genetic variation and omega-3 fatty acid deficiency on cardiometabolic disease risk in a Mexican American population. Front Nutr. 2025;12:1538505.
FADS1	rs174537	Endogenous n-3 HUFA	EPA levels (ng/mL) **[DEFICIENCY]**	493	<0.001	TT: 3.03 ng/mL (homozygous major/ancestral) **[DEFICIENCY LEVEL]**	GG: 4.84 ng/mL (homozygous minor/derived); -38.30% difference (95% CI: -50.60, -22.94); ARA/EPA ratio ~30:1 in TT genotype	Cross-sectional	Blomquist SA, Albrecht JH, Hallmark B, Klimentidis YC, Garcia LA, Mandarino LJ, Coletta DK, Chilton FH. The influence of FADS genetic variation and omega-3 fatty acid deficiency on cardiometabolic disease risk in a Mexican American population. Front Nutr. 2025;12:1538505.
FADS1	rs174537	Endogenous n-6 HUFA	ARA levels (ng/mL)	493	3.00E-14	TT: 55.83 ng/mL (homozygous major/ancestral)	GG: 86.23 ng/mL (homozygous minor/derived); -32.92% difference (95% CI: -39.10, -26.11)	Cross-sectional	Blomquist SA, Albrecht JH, Hallmark B, Klimentidis YC, Garcia LA, Mandarino LJ, Coletta DK, Chilton FH. The influence of FADS genetic variation and omega-3 fatty acid deficiency on cardiometabolic disease risk in a Mexican American population. Front Nutr. 2025;12:1538505.
FADS1	rs174537	Endogenous n-6 HUFA	DGLA levels (ng/mL)	493	3.40E-05	TT: 19.4 ng/mL (homozygous major/ancestral)	GG: 15.18 ng/mL (homozygous minor/derived); +31.59% difference (95% CI: 17.55, 47.31)	Cross-sectional	Blomquist SA, Albrecht JH, Hallmark B, Klimentidis YC, Garcia LA, Mandarino LJ, Coletta DK, Chilton FH. The influence of FADS genetic variation and omega-3 fatty acid deficiency on cardiometabolic disease risk in a Mexican American population. Front Nutr. 2025;12:1538505.
FADS1	rs174550	Ery DHA	HDL-C	2668	0.69	No interaction	No interaction	Cross-sect	Zhu, J., Q. Sun, G. Zong, Y. Si, C. Liu, Q. Qi, X. Ye, L. Sun, H. Sheng, H. Li, and X. Lin. Interaction between a common variant in FADS1 and erythrocyte polyunsaturated fatty acids on lipid profile in Chinese Hans. J. Lipid Res. 2013. 54: 1477–1483.
FADS1	rs174550	Ery DHA	HDL-C/TG ratio	2668	0.96	No interaction	No interaction	Cross-sect	Zhu, J., Q. Sun, G. Zong, Y. Si, C. Liu, Q. Qi, X. Ye, L. Sun, H. Sheng, H. Li, and X. Lin. Interaction between a common variant in FADS1 and erythrocyte polyunsaturated fatty acids on lipid profile in Chinese Hans. J. Lipid Res. 2013. 54: 1477–1483.
FADS1	rs174550	Ery DHA	LDL-C	2668	0.69	No interaction	No interaction	Cross-sect	Zhu, J., Q. Sun, G. Zong, Y. Si, C. Liu, Q. Qi, X. Ye, L. Sun, H. Sheng, H. Li, and X. Lin. Interaction between a common variant in FADS1 and erythrocyte polyunsaturated fatty acids on lipid profile in Chinese Hans. J. Lipid Res. 2013. 54: 1477–1483.
FADS1	rs174550	Ery DHA	TG	2668	0.55	No interaction	No interaction	Cross-sect	Zhu, J., Q. Sun, G. Zong, Y. Si, C. Liu, Q. Qi, X. Ye, L. Sun, H. Sheng, H. Li, and X. Lin. Interaction between a common variant in FADS1 and erythrocyte polyunsaturated fatty acids on lipid profile in Chinese Hans. J. Lipid Res. 2013. 54: 1477–1483.
FADS1	rs174550	Ery EPA	HDL-C	2670	0.72	No interaction	No interaction	Cross-sect	Zhu, J., Q. Sun, G. Zong, Y. Si, C. Liu, Q. Qi, X. Ye, L. Sun, H. Sheng, H. Li, and X. Lin. Interaction between a common variant in FADS1 and erythrocyte polyunsaturated fatty acids on lipid profile in Chinese Hans. J. Lipid Res. 2013. 54: 1477–1483.
FADS1	rs174550	Ery EPA	HDL-C/TG ratio	2670	0.37	No interaction	No interaction	Cross-sect	Zhu, J., Q. Sun, G. Zong, Y. Si, C. Liu, Q. Qi, X. Ye, L. Sun, H. Sheng, H. Li, and X. Lin. Interaction between a common variant in FADS1 and erythrocyte polyunsaturated fatty acids on lipid profile in Chinese Hans. J. Lipid Res. 2013. 54: 1477–1483.
FADS1	rs174550	Ery EPA	LDL-C	2670	0.81	No interaction	No interaction	Cross-sect	Zhu, J., Q. Sun, G. Zong, Y. Si, C. Liu, Q. Qi, X. Ye, L. Sun, H. Sheng, H. Li, and X. Lin. Interaction between a common variant in FADS1 and erythrocyte polyunsaturated fatty acids on lipid profile in Chinese Hans. J. Lipid Res. 2013. 54: 1477–1483.
FADS1	rs174550	Ery EPA	TG	2670	0.35	No interaction	No interaction	Cross-sect	Zhu, J., Q. Sun, G. Zong, Y. Si, C. Liu, Q. Qi, X. Ye, L. Sun, H. Sheng, H. Li, and X. Lin. Interaction between a common variant in FADS1 and erythrocyte polyunsaturated fatty acids on lipid profile in Chinese Hans. J. Lipid Res. 2013. 54: 1477–1483.
FADS1	rs174550	Ery EPA+DHA	HDL-C	2668	0.79	No interaction	No interaction	Cross-sect	Zhu, J., Q. Sun, G. Zong, Y. Si, C. Liu, Q. Qi, X. Ye, L. Sun, H. Sheng, H. Li, and X. Lin. Interaction between a common variant in FADS1 and erythrocyte polyunsaturated fatty acids on lipid profile in Chinese Hans. J. Lipid Res. 2013. 54: 1477–1483.
FADS1	rs174550	Ery EPA+DHA	HDL-C/TG ratio	2668	0.67	No interaction	No interaction	Cross-sect	Zhu, J., Q. Sun, G. Zong, Y. Si, C. Liu, Q. Qi, X. Ye, L. Sun, H. Sheng, H. Li, and X. Lin. Interaction between a common variant in FADS1 and erythrocyte polyunsaturated fatty acids on lipid profile in Chinese Hans. J. Lipid Res. 2013. 54: 1477–1483.
FADS1	rs174550	Ery EPA+DHA	LDL-C	2668	0.70	No interaction	No interaction	Cross-sect	Zhu, J., Q. Sun, G. Zong, Y. Si, C. Liu, Q. Qi, X. Ye, L. Sun, H. Sheng, H. Li, and X. Lin. Interaction between a common variant in FADS1 and erythrocyte polyunsaturated fatty acids on lipid profile in Chinese Hans. J. Lipid Res. 2013. 54: 1477–1483.
FADS1	rs174550	Ery EPA+DHA	TG	2668	0.41	No interaction	No interaction	Cross-sect	Zhu, J., Q. Sun, G. Zong, Y. Si, C. Liu, Q. Qi, X. Ye, L. Sun, H. Sheng, H. Li, and X. Lin. Interaction between a common variant in FADS1 and erythrocyte polyunsaturated fatty acids on lipid profile in Chinese Hans. J. Lipid Res. 2013. 54: 1477–1483.
FADS1	rs174550	Ery 18:2n-6	HDL-C	2672	0.02	Low 18:2n-6 + TT: HDL-C=1.34±0.01; Low 18:2n-6 + TC: HDL-C=1.29±0.01; Low 18:2n-6 + CC: HDL-C=1.27±0.03, P=0.001	High 18:2n-6 + TT: HDL-C=1.26±0.02; High 18:2n-6 + TC: HDL-C=1.28±0.01; High 18:2n-6 + CC: HDL-C=1.25±0.02, P=0.98	Cross-sect	Zhu, J., Q. Sun, G. Zong, Y. Si, C. Liu, Q. Qi, X. Ye, L. Sun, H. Sheng, H. Li, and X. Lin. Interaction between a common variant in FADS1 and erythrocyte polyunsaturated fatty acids on lipid profile in Chinese Hans. J. Lipid Res. 2013. 54: 1477–1483.
FADS1	rs174550	Ery 18:2n-6	TG	2672	0.76	No interaction	No interaction	Cross-sect	Zhu, J., Q. Sun, G. Zong, Y. Si, C. Liu, Q. Qi, X. Ye, L. Sun, H. Sheng, H. Li, and X. Lin. Interaction between a common variant in FADS1 and erythrocyte polyunsaturated fatty acids on lipid profile in Chinese Hans. J. Lipid Res. 2013. 54: 1477–1483.
FADS1	rs174550	Ery 18:2n-6	HDL-C/TG ratio	2672	0.18	No interaction	No interaction	Cross-sect	Zhu, J., Q. Sun, G. Zong, Y. Si, C. Liu, Q. Qi, X. Ye, L. Sun, H. Sheng, H. Li, and X. Lin. Interaction between a common variant in FADS1 and erythrocyte polyunsaturated fatty acids on lipid profile in Chinese Hans. J. Lipid Res. 2013. 54: 1477–1483.
FADS1	rs174550	Ery 18:2n-6	LDL-C	2672	0.51	No interaction	No interaction	Cross-sect	Zhu, J., Q. Sun, G. Zong, Y. Si, C. Liu, Q. Qi, X. Ye, L. Sun, H. Sheng, H. Li, and X. Lin. Interaction between a common variant in FADS1 and erythrocyte polyunsaturated fatty acids on lipid profile in Chinese Hans. J. Lipid Res. 2013. 54: 1477–1483.
FADS1	rs174550	Ery 18:3n-3	HDL-C	2672	0.03	Low 18:3n-3 + TT: HDL-C=1.36±0.01; Low 18:3n-3 + TC: HDL-C=1.33±0.01; Low 18:3n-3 + CC: HDL-C=1.32±0.03, P=0.01	High 18:3n-3 + TT: HDL-C=1.23±0.01; High 18:3n-3 + TC: HDL-C=1.24±0.01; High 18:3n-3 + CC: HDL-C=1.23±0.02, P=0.57	Cross-sect	Zhu, J., Q. Sun, G. Zong, Y. Si, C. Liu, Q. Qi, X. Ye, L. Sun, H. Sheng, H. Li, and X. Lin. Interaction between a common variant in FADS1 and erythrocyte polyunsaturated fatty acids on lipid profile in Chinese Hans. J. Lipid Res. 2013. 54: 1477–1483.
FADS1	rs174550	Ery 18:3n-3	TG	2672	0.2	No interaction	No interaction	Cross-sect	Zhu, J., Q. Sun, G. Zong, Y. Si, C. Liu, Q. Qi, X. Ye, L. Sun, H. Sheng, H. Li, and X. Lin. Interaction between a common variant in FADS1 and erythrocyte polyunsaturated fatty acids on lipid profile in Chinese Hans. J. Lipid Res. 2013. 54: 1477–1483.
FADS1	rs174550	Ery 18:3n-3	HDL-C/TG ratio	2672	0.04	Low 18:3n-3 + TT: Ratio=1.79±0.04; Low 18:3n-3 + TC: Ratio=1.64±0.04; Low 18:3n-3 + CC: Ratio=1.74±0.10, P=0.03	High 18:3n-3 + TT: Ratio=1.24±0.04; High 18:3n-3 + TC: Ratio=1.23±0.03; High 18:3n-3 + CC: Ratio=1.19±0.05, P=0.66	Cross-sect	Zhu, J., Q. Sun, G. Zong, Y. Si, C. Liu, Q. Qi, X. Ye, L. Sun, H. Sheng, H. Li, and X. Lin. Interaction between a common variant in FADS1 and erythrocyte polyunsaturated fatty acids on lipid profile in Chinese Hans. J. Lipid Res. 2013. 54: 1477–1483.
FADS1	rs174550	Ery 18:3n-3	LDL-C	2672	0.84	No interaction	No interaction	Cross-sect	Zhu, J., Q. Sun, G. Zong, Y. Si, C. Liu, Q. Qi, X. Ye, L. Sun, H. Sheng, H. Li, and X. Lin. Interaction between a common variant in FADS1 and erythrocyte polyunsaturated fatty acids on lipid profile in Chinese Hans. J. Lipid Res. 2013. 54: 1477–1483.
FADS1	rs174537	F3-IsoP (EPA)	U F3-IsoP	120	NS	Diet: Cauc P=0.0011, AA P=0.0002; Geno AA P=0.0221	Omega-oil: 0.5→1.5	RCT 6d	B. Dosso, C. M. K. Waits, K. N. Simms, S. Sergeant, D. C. Files, T. D. Howard, C. D. Langefeld, F. H. Chilton and E. Rahbar, Impact of rs174537 on Critically Ill Patients with Acute Lung Injury: A Secondary Analysis of the OMEGA Randomized Clinical Trial, Curr Dev Nutr, 2020, 4, nzaa147.
FADS1-FADS2	rs174570	Food-sourced EPA+DHA	BMI change (~10y)	29674	0.009	T carriers: BMI change across tertiles: T1=-0.105, T2=0.027, T3=0.120 kg/m² per T allele (p for trend across tertiles)	Non-T carriers: Weaker effects across tertiles	Meta-analysis (4 cohorts pooled)	T. Huang, T. Wang, Y. Heianza, J. Wiggs, D. Sun, H. K. Choi, J. F. Chai, X. Sim, C. C. Khor, Y. Friedlander, A. T. Chan, G. Curhan, I. De Vivo, R. M. van Dam, C. K. Heng, C. Fuchs, L. R. Pasquale, J. M. Yuan, F. B. Hu, W. P. Koh and L. Qi, Fish and marine fatty acids intakes, the FADS genotypes and long-term weight gain: a prospective cohort study, BMJ Open, 2019, 9, e022877.
FADS1-FADS2	rs174570	Food-sourced EPA+DHA	BMI change (~10y)	5264	0.02	T carriers (CT+TT): Higher n-3 PUFA intake associated with greater BMI increase	Non-T carriers (CC): Weaker association	Prospective cohort (SCHS, 1998-2004)	T. Huang, T. Wang, Y. Heianza, J. Wiggs, D. Sun, H. K. Choi, J. F. Chai, X. Sim, C. C. Khor, Y. Friedlander, A. T. Chan, G. Curhan, I. De Vivo, R. M. van Dam, C. K. Heng, C. Fuchs, L. R. Pasquale, J. M. Yuan, F. B. Hu, W. P. Koh and L. Qi, Fish and marine fatty acids intakes, the FADS genotypes and long-term weight gain: a prospective cohort study, BMJ Open, 2019, 9, e022877.
FADS1-FADS2	rs174570	Food-sourced EPA+DHA	BMI change (~10y)	6254	0.04	T carriers (CT+TT): Higher n-3 PUFA intake associated with greater BMI increase	Non-T carriers (CC): Weaker association	Prospective cohort (WHI, 1994-2000)	T. Huang, T. Wang, Y. Heianza, J. Wiggs, D. Sun, H. K. Choi, J. F. Chai, X. Sim, C. C. Khor, Y. Friedlander, A. T. Chan, G. Curhan, I. De Vivo, R. M. van Dam, C. K. Heng, C. Fuchs, L. R. Pasquale, J. M. Yuan, F. B. Hu, W. P. Koh and L. Qi, Fish and marine fatty acids intakes, the FADS genotypes and long-term weight gain: a prospective cohort study, BMJ Open, 2019, 9, e022877.
FADS1-FADS2	rs174570	Food-sourced EPA+DHA	BMI change (~10y)	6833	0.05	T carriers (CT+TT): Higher n-3 PUFA intake associated with greater BMI increase	Non-T carriers (CC): Weaker association	Prospective cohort (HPFS, 1990-2000)	T. Huang, T. Wang, Y. Heianza, J. Wiggs, D. Sun, H. K. Choi, J. F. Chai, X. Sim, C. C. Khor, Y. Friedlander, A. T. Chan, G. Curhan, I. De Vivo, R. M. van Dam, C. K. Heng, C. Fuchs, L. R. Pasquale, J. M. Yuan, F. B. Hu, W. P. Koh and L. Qi, Fish and marine fatty acids intakes, the FADS genotypes and long-term weight gain: a prospective cohort study, BMJ Open, 2019, 9, e022877.
FADS1-FADS2	rs174570	Food-sourced EPA+DHA	BMI change (~10y)	11323	0.02	T carriers (CT+TT): Higher n-3 PUFA intake associated with greater BMI increase (β=0.79 kg/m² per g EPA+DHA, p=3×10⁻⁵)	Non-T carriers (CC): Weaker association (β=0.16 kg/m² per g, p=0.08)	Prospective cohort (NHS, 1990-2000)	T. Huang, T. Wang, Y. Heianza, J. Wiggs, D. Sun, H. K. Choi, J. F. Chai, X. Sim, C. C. Khor, Y. Friedlander, A. T. Chan, G. Curhan, I. De Vivo, R. M. van Dam, C. K. Heng, C. Fuchs, L. R. Pasquale, J. M. Yuan, F. B. Hu, W. P. Koh and L. Qi, Fish and marine fatty acids intakes, the FADS genotypes and long-term weight gain: a prospective cohort study, BMJ Open, 2019, 9, e022877.
FADS1	rs174537	GLA 5.92g 2×/d	Circ GLA	144	NS	Diet P<0.0001 both races; No genotype difference	Omega-oil: ~1.5% by d6	RCT 6d	B. Dosso, C. M. K. Waits, K. N. Simms, S. Sergeant, D. C. Files, T. D. Howard, C. D. Langefeld, F. H. Chilton and E. Rahbar, Impact of rs174537 on Critically Ill Patients with Acute Lung Injury: A Secondary Analysis of the OMEGA Randomized Clinical Trial, Curr Dev Nutr, 2020, 4, nzaa147.
FADS1	rs174550	High-ALA diet (ALA 5 E-%)	15-HEPE (EPA-derived)	60	0.0203	TT: 15-HEPE increased	CC: 15-HEPE unchanged	RCT 8wk	T. Meuronen, M. A. Lankinen, J. Kolmert, V. D. de Mello, T. Sallinen, J. Agren, K. A. Virtanen, M. Laakso, C. E. Wheelock, J. Pihlajamaki and U. Schwab, The FADS1 rs174550 Genotype Modifies the n-3 and n-6 PUFA and Lipid Mediator Responses to a High Alpha-Linolenic Acid and High Linoleic Acid Diets, Mol Nutr Food Res, 2022, 66, e2200351.
FADS1	rs174550	High-ALA diet (ALA 5 E-%)	EPA-derived lipid mediators (8-HEPE, 5-HEPE, 14,15-DiHETE, 17,18-DiHETE, 18-HEPE)	60	<0.05	TT: all increased	CC: all unchanged	RCT 8wk	T. Meuronen, M. A. Lankinen, J. Kolmert, V. D. de Mello, T. Sallinen, J. Agren, K. A. Virtanen, M. Laakso, C. E. Wheelock, J. Pihlajamaki and U. Schwab, The FADS1 rs174550 Genotype Modifies the n-3 and n-6 PUFA and Lipid Mediator Responses to a High Alpha-Linolenic Acid and High Linoleic Acid Diets, Mol Nutr Food Res, 2022, 66, e2200351.
FADS1	rs174550	High-ALA diet (ALA 5 E-%)	Plasma EPA (CE) ⭐	60	Significant	TT: EPA increased	CC: EPA unchanged	RCT 8wk	T. Meuronen, M. A. Lankinen, J. Kolmert, V. D. de Mello, T. Sallinen, J. Agren, K. A. Virtanen, M. Laakso, C. E. Wheelock, J. Pihlajamaki and U. Schwab, The FADS1 rs174550 Genotype Modifies the n-3 and n-6 PUFA and Lipid Mediator Responses to a High Alpha-Linolenic Acid and High Linoleic Acid Diets, Mol Nutr Food Res, 2022, 66, e2200351.
FADS1	rs174550	High-ALA diet (ALA 5 E-%)	Plasma EPA (PL)	60	0.018	TT: EPA tended to increase	CC: EPA unchanged	RCT 8wk	T. Meuronen, M. A. Lankinen, J. Kolmert, V. D. de Mello, T. Sallinen, J. Agren, K. A. Virtanen, M. Laakso, C. E. Wheelock, J. Pihlajamaki and U. Schwab, The FADS1 rs174550 Genotype Modifies the n-3 and n-6 PUFA and Lipid Mediator Responses to a High Alpha-Linolenic Acid and High Linoleic Acid Diets, Mol Nutr Food Res, 2022, 66, e2200351.
FADS1	rs174550	High-LA diet (LA 10 E-%)	11,12-DiHETrE (AA-derived)	58	<0.05	TT: unchanged	CC: decreased	RCT 8wk	T. Meuronen, M. A. Lankinen, J. Kolmert, V. D. de Mello, T. Sallinen, J. Agren, K. A. Virtanen, M. Laakso, C. E. Wheelock, J. Pihlajamaki and U. Schwab, The FADS1 rs174550 Genotype Modifies the n-3 and n-6 PUFA and Lipid Mediator Responses to a High Alpha-Linolenic Acid and High Linoleic Acid Diets, Mol Nutr Food Res, 2022, 66, e2200351.
FADS1	rs174550	High-LA diet (LA 10 E-%)	14,15-DiHETrE (AA-derived)	58	<0.05	TT: unchanged	CC: decreased	RCT 8wk	T. Meuronen, M. A. Lankinen, J. Kolmert, V. D. de Mello, T. Sallinen, J. Agren, K. A. Virtanen, M. Laakso, C. E. Wheelock, J. Pihlajamaki and U. Schwab, The FADS1 rs174550 Genotype Modifies the n-3 and n-6 PUFA and Lipid Mediator Responses to a High Alpha-Linolenic Acid and High Linoleic Acid Diets, Mol Nutr Food Res, 2022, 66, e2200351.
FADS1	rs174550	High-LA diet (LA 10 E-%)	D5D index (AA/DGLA)	58	Significant	TT: D5D unchanged	CC: D5D tended to decrease	RCT 8wk	T. Meuronen, M. A. Lankinen, J. Kolmert, V. D. de Mello, T. Sallinen, J. Agren, K. A. Virtanen, M. Laakso, C. E. Wheelock, J. Pihlajamaki and U. Schwab, The FADS1 rs174550 Genotype Modifies the n-3 and n-6 PUFA and Lipid Mediator Responses to a High Alpha-Linolenic Acid and High Linoleic Acid Diets, Mol Nutr Food Res, 2022, 66, e2200351.
FADS1	rs174550	High-LA diet (LA 10 E-%)	Plasma AA (CE)	58	Significant	TT: AA unchanged	CC: AA decreased	RCT 8wk	T. Meuronen, M. A. Lankinen, J. Kolmert, V. D. de Mello, T. Sallinen, J. Agren, K. A. Virtanen, M. Laakso, C. E. Wheelock, J. Pihlajamaki and U. Schwab, The FADS1 rs174550 Genotype Modifies the n-3 and n-6 PUFA and Lipid Mediator Responses to a High Alpha-Linolenic Acid and High Linoleic Acid Diets, Mol Nutr Food Res, 2022, 66, e2200351.
FADS1	rs174550	High-LA diet (LA 10 E-%)	Plasma AA (PL)	58	Present	TT: AA unchanged	CC: AA decreased	RCT 8wk	T. Meuronen, M. A. Lankinen, J. Kolmert, V. D. de Mello, T. Sallinen, J. Agren, K. A. Virtanen, M. Laakso, C. E. Wheelock, J. Pihlajamaki and U. Schwab, The FADS1 rs174550 Genotype Modifies the n-3 and n-6 PUFA and Lipid Mediator Responses to a High Alpha-Linolenic Acid and High Linoleic Acid Diets, Mol Nutr Food Res, 2022, 66, e2200351.
FADS1	rs174547	Linoleic acid (LA) conversion	ARA biosynthesis (13C-ARA AUC14d)	55	<0.05	TT genotype: 3708 ± 438 ng/mL·h (100% reference, highest ARA biosynthesis capacity)	TC: 2116 ± 183 ng/mL·h (57% of TT); CC: 1356 ± 358 ng/mL·h (37% of TT). Dose-dependent decrease with C allele - dramatically reduced LA→ARA conversion	Stable isotope tracer study (cross-sect)	H. Sasaki, T. Sueyasu, H. Tokuda, M. Ito, Y. Kaneda, T. Rogi, H. Kawashima, S. Horiguchi, T. Kawabata and H. Shibata, Aging and FADS1 polymorphisms decrease the biosynthetic capacity of long-chain PUFAs: A human trial using [U-13C]linoleic acid, Prostaglandins, Leukotrienes and Essential Fatty Acids, 2019, 148, 1-8.
FADS1	rs174547 (C allele carriers only)	Linoleic acid (LA) conversion + aging	ARA biosynthesis with aging	36	<0.05	Young C carriers (TC+CC, age 25-34): 2264 ± 241 ng/mL·h 13C-ARA AUC	Elderly C carriers (TC+CC, age 65-74): 1550 ± 200 ng/mL·h (32% lower ARA biosynthesis with aging, P<0.05)	Stable isotope tracer study (cross-sect)	H. Sasaki, T. Sueyasu, H. Tokuda, M. Ito, Y. Kaneda, T. Rogi, H. Kawashima, S. Horiguchi, T. Kawabata and H. Shibata, Aging and FADS1 polymorphisms decrease the biosynthetic capacity of long-chain PUFAs: A human trial using [U-13C]linoleic acid, Prostaglandins, Leukotrienes and Essential Fatty Acids, 2019, 148, 1-8.
FADS1	rs174547 (T>C)	Nut consumption (ALA source)	Plasma ALA (1-yr change)	928	0.015	TT: +0.08 SD	TC/CC: +0.29 SD	RCT (MedDiet+Nuts)	Jäger S, Kuxhaus O, Prada M, et al. Nut consumption, linoleic and α-linolenic acid intakes, and genetics: how fatty acid desaturase 1 impacts plasma fatty acids and type 2 diabetes risk in EPIC-InterAct and PREDIMED studies. BMC Medicine. 2025;23:344. DOI: 10.1186/s12916-025-04187-9
FADS1	rs174547 (T>C)	Nut consumption (LA source)	Plasma LA (1-yr change)	928	0.003	TT: -0.01 SD	TC/CC: +0.24 SD	RCT (MedDiet+Nuts)	Jäger S, Kuxhaus O, Prada M, et al. Nut consumption, linoleic and α-linolenic acid intakes, and genetics: how fatty acid desaturase 1 impacts plasma fatty acids and type 2 diabetes risk in EPIC-InterAct and PREDIMED studies. BMC Medicine. 2025;23:344. DOI: 10.1186/s12916-025-04187-8
FADS1	rs174546	Plasma ALA/LA	HDL-C	192	0.264	Low ALA/LA: +0.033 mmol/L per C (P=0.078)	High ALA/LA: +0.015 mmol/L per C (P=0.352)	Cross-sect T2D	P. C. Huang, H. Cheng, Y. T. Su, M. C. Huang, C. C. Hsu, S. J. Hwang, S. J. Shin and W. T. Chang, Interaction among dietary n-3 and n-6 polyunsaturated fatty acid intake, fatty acid desaturase 2 genetic variants, and low-density lipoprotein cholesterol levels in type 2 diabetes patients, J Diabetes Investig, 2023, 14, 297-308.
FADS1	rs174546	Plasma ALA/LA	LDL-C	192	0.268	Low ALA/LA: +0.370 mmol/L per C (P=0.008)	High ALA/LA: +0.099 mmol/L per C (P=0.438)	Cross-sect T2D	P. C. Huang, H. Cheng, Y. T. Su, M. C. Huang, C. C. Hsu, S. J. Hwang, S. J. Shin and W. T. Chang, Interaction among dietary n-3 and n-6 polyunsaturated fatty acid intake, fatty acid desaturase 2 genetic variants, and low-density lipoprotein cholesterol levels in type 2 diabetes patients, J Diabetes Investig, 2023, 14, 297-308.
FADS1	rs174546	Plasma ALA/LA	Total chol	192	0.127	Low ALA/LA: +0.326 mmol/L per C (P=0.029)	High ALA/LA: -0.012 mmol/L per C (P=0.934)	Cross-sect T2D	P. C. Huang, H. Cheng, Y. T. Su, M. C. Huang, C. C. Hsu, S. J. Hwang, S. J. Shin and W. T. Chang, Interaction among dietary n-3 and n-6 polyunsaturated fatty acid intake, fatty acid desaturase 2 genetic variants, and low-density lipoprotein cholesterol levels in type 2 diabetes patients, J Diabetes Investig, 2023, 14, 297-308.
FADS1	rs174550	Plasma LA proportion	Fasting glucose	1337	0.050	TT: Lower glucose in high LA tertiles (P<0.01)	CC: No difference across LA tertiles	Cross-sect	M. A. Lankinen, A. Fauland, B. I. Shimizu, J. Agren, C. E. Wheelock, M. Laakso, U. Schwab and J. Pihlajamaki, Inflammatory response to dietary linoleic acid depends on FADS1 genotype, Am J Clin Nutr, 2019, 109, 165-175.
FADS1	rs174550	Plasma LA proportion	hsCRP	1337	NS	TT/TC: Lower in highest LA tertile	CC: No pattern	Cross-sect	M. A. Lankinen, A. Fauland, B. I. Shimizu, J. Agren, C. E. Wheelock, M. Laakso, U. Schwab and J. Pihlajamaki, Inflammatory response to dietary linoleic acid depends on FADS1 genotype, Am J Clin Nutr, 2019, 109, 165-175.
FADS1	rs174546	Plasma n-3/n-6	HDL-C	192	0.550	Low n-3/n-6: +0.025 mmol/L per C (P=0.175)	High n-3/n-6: +0.011 mmol/L per C (P=0.501)	Cross-sect T2D	P. C. Huang, H. Cheng, Y. T. Su, M. C. Huang, C. C. Hsu, S. J. Hwang, S. J. Shin and W. T. Chang, Interaction among dietary n-3 and n-6 polyunsaturated fatty acid intake, fatty acid desaturase 2 genetic variants, and low-density lipoprotein cholesterol levels in type 2 diabetes patients, J Diabetes Investig, 2023, 14, 297-308.
FADS1	rs174546	Plasma n-3/n-6	LDL-C	192	0.610	Low n-3/n-6: +0.278 mmol/L per C (P=0.064)	High n-3/n-6: +0.189 mmol/L per C (P=0.096)	Cross-sect T2D	P. C. Huang, H. Cheng, Y. T. Su, M. C. Huang, C. C. Hsu, S. J. Hwang, S. J. Shin and W. T. Chang, Interaction among dietary n-3 and n-6 polyunsaturated fatty acid intake, fatty acid desaturase 2 genetic variants, and low-density lipoprotein cholesterol levels in type 2 diabetes patients, J Diabetes Investig, 2023, 14, 297-308.
FADS1	rs174546	Plasma n-3/n-6	Total chol	192	0.914	Low n-3/n-6: +0.152 mmol/L per C (P=0.325)	High n-3/n-6: +0.163 mmol/L per C (P=0.196)	Cross-sect T2D	P. C. Huang, H. Cheng, Y. T. Su, M. C. Huang, C. C. Hsu, S. J. Hwang, S. J. Shin and W. T. Chang, Interaction among dietary n-3 and n-6 polyunsaturated fatty acid intake, fatty acid desaturase 2 genetic variants, and low-density lipoprotein cholesterol levels in type 2 diabetes patients, J Diabetes Investig, 2023, 14, 297-308.
FADS1-FADS2	rs174570	Total EPA+DHA (food + supplements)	BMI change (~10y)	29674	0.007	T carriers: Higher total EPA+DHA intake associated with greater BMI increase	Non-T carriers: Weaker association	Meta-analysis (pooled)	T. Huang, T. Wang, Y. Heianza, J. Wiggs, D. Sun, H. K. Choi, J. F. Chai, X. Sim, C. C. Khor, Y. Friedlander, A. T. Chan, G. Curhan, I. De Vivo, R. M. van Dam, C. K. Heng, C. Fuchs, L. R. Pasquale, J. M. Yuan, F. B. Hu, W. P. Koh and L. Qi, Fish and marine fatty acids intakes, the FADS genotypes and long-term weight gain: a prospective cohort study, BMJ Open, 2019, 9, e022877.
FADS1	rs174550	Total marine PUFA intake	Erythrocyte EPA (20:5n-3)	954	0.032	T/T: βT/T=0.09	T/C: βT/C=0.10; C/C: βC/C=0.15	Cross-sectional	M. J. Takkunen, V. D. de Mello, U. S. Schwab, J. Kuusisto, M. Vaittinen, J. J. Agren, M. Laakso, J. Pihlajamaki and M. I. Uusitupa, Gene-diet interaction of a common FADS1 variant with marine polyunsaturated fatty acids for fatty acid composition in plasma and erythrocytes among men, Mol Nutr Food Res, 2016, 60, 381-389.
FADS1	rs174550	Total marine PUFA intake	Erythrocyte EPA (20:5n-3) [no supplements]	732	0.0026	T/T: βT/T=0.09	T/C: βT/C=0.10; C/C: βC/C=0.15	Cross-sectional	M. J. Takkunen, V. D. de Mello, U. S. Schwab, J. Kuusisto, M. Vaittinen, J. J. Agren, M. Laakso, J. Pihlajamaki and M. I. Uusitupa, Gene-diet interaction of a common FADS1 variant with marine polyunsaturated fatty acids for fatty acid composition in plasma and erythrocytes among men, Mol Nutr Food Res, 2016, 60, 381-389.
FADS1	rs174550	Total marine PUFA intake	Plasma CE EPA (20:5n-3)	845	0.035	T/T: βT/T=0.08	T/C: βT/C=0.12; C/C: βC/C=0.13	Cross-sectional	M. J. Takkunen, V. D. de Mello, U. S. Schwab, J. Kuusisto, M. Vaittinen, J. J. Agren, M. Laakso, J. Pihlajamaki and M. I. Uusitupa, Gene-diet interaction of a common FADS1 variant with marine polyunsaturated fatty acids for fatty acid composition in plasma and erythrocytes among men, Mol Nutr Food Res, 2016, 60, 381-389.
FADS1	rs174550	Total marine PUFA intake	Plasma PL DPA (22:5n-3)	845	0.007	T/T: βT/T=-0.01	T/C: βT/C=0.06; C/C: βC/C=0.09	Cross-sectional	M. J. Takkunen, V. D. de Mello, U. S. Schwab, J. Kuusisto, M. Vaittinen, J. J. Agren, M. Laakso, J. Pihlajamaki and M. I. Uusitupa, Gene-diet interaction of a common FADS1 variant with marine polyunsaturated fatty acids for fatty acid composition in plasma and erythrocytes among men, Mol Nutr Food Res, 2016, 60, 381-389.
FADS1	rs174550	Total marine PUFA intake	Plasma PL EPA (20:5n-3)	845	0.062	T/T: βT/T=0.08	T/C: βT/C=0.12; C/C: βC/C=0.13	Cross-sectional	M. J. Takkunen, V. D. de Mello, U. S. Schwab, J. Kuusisto, M. Vaittinen, J. J. Agren, M. Laakso, J. Pihlajamaki and M. I. Uusitupa, Gene-diet interaction of a common FADS1 variant with marine polyunsaturated fatty acids for fatty acid composition in plasma and erythrocytes among men, Mol Nutr Food Res, 2016, 60, 381-389.
FADS1	rs174550	Total marine PUFA intake	Plasma TG EPA (20:5n-3)	845	0.035	T/T: βT/T=Not reported	T/C & C/C: βC carrier=Not reported	Cross-sectional	M. J. Takkunen, V. D. de Mello, U. S. Schwab, J. Kuusisto, M. Vaittinen, J. J. Agren, M. Laakso, J. Pihlajamaki and M. I. Uusitupa, Gene-diet interaction of a common FADS1 variant with marine polyunsaturated fatty acids for fatty acid composition in plasma and erythrocytes among men, Mol Nutr Food Res, 2016, 60, 381-389.
FADS1	rs174547	n-3 PUFAs (all)	All omega-3 PUFAs in T2DM vs Control	120	<0.001	T2DM: Significantly lower	Control: Higher (ALA: 4.01±0.41, EPA: 4.38±0.17%)	Case-control	Jarullah HH, Saleh ES. Influence of Fatty Acid Desaturase Enzyme-1 Gene (FADS-1) Polymorphism on Serum Polyunsaturated Fatty Acids Levels, Desaturase Enzymes, Lipid Profile, and Glycemic Control Parameters in Newly Diagnosed Diabetic Mellitus Patients. Int J Mol Sci. 2025 Apr 24;26(9):4015. doi: 10.3390/ijms26094015. PMID: 40362254; PMCID: PMC12071304.
FADS1	rs174547	n-6 PUFAs (all)	All omega-6 PUFAs in T2DM vs Control	120	<0.01	T2DM: Significantly lower (LA, GLA, DGLA, AA)	Control: Higher	Case-control	Jarullah HH, Saleh ES. Influence of Fatty Acid Desaturase Enzyme-1 Gene (FADS-1) Polymorphism on Serum Polyunsaturated Fatty Acids Levels, Desaturase Enzymes, Lipid Profile, and Glycemic Control Parameters in Newly Diagnosed Diabetic Mellitus Patients. Int J Mol Sci. 2025 Apr 24;26(9):4015. doi: 10.3390/ijms26094015. PMID: 40362254; PMCID: PMC12071304.
FADS1	rs174556 (TT vs CT/CC)	n3:n6 PUFA ratio (>median)	Crohn's disease risk	101 cases 495 controls	0.21	TT: OR=1.58 (95% CI 0.63-3.96)	CT/CC: OR=1.00 (95% CI 0.56-1.80)	Nested case-control	A. N. Ananthakrishnan, H. Khalili, M. Song, L. M. Higuchi, P. Lochhead, J. M. Richter and A. T. Chan, Genetic Polymorphisms in Fatty Acid Metabolism Modify the Association Between Dietary n3: n6 Intake and Risk of Ulcerative Colitis: A Prospective Cohort Study, Inflamm Bowel Dis, 2017, 23, 1898-1904.
FADS1	rs174561 (TT vs CT/CC)	n3:n6 PUFA ratio (>median)	Crohn's disease risk	101 cases 495 controls	0.71	TT: OR=1.02 (95% CI 0.55-1.89)	CT/CC: OR=1.21 (95% CI 0.54-2.68)	Nested case-control	A. N. Ananthakrishnan, H. Khalili, M. Song, L. M. Higuchi, P. Lochhead, J. M. Richter and A. T. Chan, Genetic Polymorphisms in Fatty Acid Metabolism Modify the Association Between Dietary n3: n6 Intake and Risk of Ulcerative Colitis: A Prospective Cohort Study, Inflamm Bowel Dis, 2017, 23, 1898-1904.
FADS1	rs174556 (TT vs CT/CC)	n3:n6 PUFA ratio (>median)	Ulcerative colitis risk	139 cases 495 controls	0.66	TT: OR=0.46 (95% CI 0.19-1.07)	CT/CC: OR=0.69 (95% CI 0.40-1.18)	Nested case-control	A. N. Ananthakrishnan, H. Khalili, M. Song, L. M. Higuchi, P. Lochhead, J. M. Richter and A. T. Chan, Genetic Polymorphisms in Fatty Acid Metabolism Modify the Association Between Dietary n3: n6 Intake and Risk of Ulcerative Colitis: A Prospective Cohort Study, Inflamm Bowel Dis, 2017, 23, 1898-1904.
FADS1	rs174561 (TT vs CT/CC)	n3:n6 PUFA ratio (>median)	Ulcerative colitis risk	139 cases 495 controls	0.81	TT: OR=0.64 (95% CI 0.36-1.11)	CT/CC: OR=0.56 (95% CI 0.26-1.21)	Nested case-control	A. N. Ananthakrishnan, H. Khalili, M. Song, L. M. Higuchi, P. Lochhead, J. M. Richter and A. T. Chan, Genetic Polymorphisms in Fatty Acid Metabolism Modify the Association Between Dietary n3: n6 Intake and Risk of Ulcerative Colitis: A Prospective Cohort Study, Inflamm Bowel Dis, 2017, 23, 1898-1904.
FADS1 (TWIS)	eQTL-based (S-MultiXcan)	Fish oil supplements (omega-3)	Omega-3%	200060	8.8×10⁻²²	Genetically predicted expression×FOS	Most significant gene across 49 GTEx tissues	Cross-sectional GWIS with TWIS	Ihejirika SA, Chiang AH, Singh A, Stephen E, Chen H, Ye K. A multi-level gene-diet interaction analysis of fish oil and 14 polyunsaturated fatty acid traits identifies the FADS and GPR12 loci. HGG Adv. 2025 Jul 10;6(3):100459. doi: 10.1016/j.xhgg.2025.100459. Epub 2025 May 21. PMID: 40405463; PMCID: PMC12172259.
FADS1-FADS2	rs35473591 (C>CT, MAF=0.34)	Fish oil supplements (omega-3)	DHA	200060	1.56×10⁻¹²	Significant gene×FOS interaction	β_interaction=-0.0492	Cross-sectional GWIS	Ihejirika SA, Chiang AH, Singh A, Stephen E, Chen H, Ye K. A multi-level gene-diet interaction analysis of fish oil and 14 polyunsaturated fatty acid traits identifies the FADS and GPR12 loci. HGG Adv. 2025 Jul 10;6(3):100459. doi: 10.1016/j.xhgg.2025.100459. Epub 2025 May 21. PMID: 40405463; PMCID: PMC12172259.
FADS1-FADS2	rs35473591 (C>CT, MAF=0.34)	Fish oil supplements (omega-3)	Omega-3%	200060	2.50×10⁻²³	βG=0.42 (C allele, no FOS)	βG=0.35 (C allele, with FOS); βE=0.45,0.50,0.59 for C/C,C/CT,CT/CT	Cross-sectional GWIS	Ihejirika SA, Chiang AH, Singh A, Stephen E, Chen H, Ye K. A multi-level gene-diet interaction analysis of fish oil and 14 polyunsaturated fatty acid traits identifies the FADS and GPR12 loci. HGG Adv. 2025 Jul 10;6(3):100459. doi: 10.1016/j.xhgg.2025.100459. Epub 2025 May 21. PMID: 40405463; PMCID: PMC12172259.
FADS1-FADS2	rs35473591 (C>CT, MAF=0.34)	Fish oil supplements (omega-3)	Omega-6:omega-3 ratio	200060	1.09×10⁻²⁰	Positive genetic effect without FOS	Reduced genetic effect with FOS (β_int=0.0672)	Cross-sectional GWIS	Ihejirika SA, Chiang AH, Singh A, Stephen E, Chen H, Ye K. A multi-level gene-diet interaction analysis of fish oil and 14 polyunsaturated fatty acid traits identifies the FADS and GPR12 loci. HGG Adv. 2025 Jul 10;6(3):100459. doi: 10.1016/j.xhgg.2025.100459. Epub 2025 May 21. PMID: 40405463; PMCID: PMC12172259.
FADS1-FADS2	rs35473591 (C>CT, MAF=0.34)	Fish oil supplements (omega-3)	Total omega-3	200060	2.74×10⁻¹⁷	Genetic effect attenuated by FOS	β_interaction=-0.0595	Cross-sectional GWIS	Ihejirika SA, Chiang AH, Singh A, Stephen E, Chen H, Ye K. A multi-level gene-diet interaction analysis of fish oil and 14 polyunsaturated fatty acid traits identifies the FADS and GPR12 loci. HGG Adv. 2025 Jul 10;6(3):100459. doi: 10.1016/j.xhgg.2025.100459. Epub 2025 May 21. PMID: 40405463; PMCID: PMC12172259.
FADS1-FADS2 (MYRF)	rs174535 (T>C, MAF=0.35)	Fish oil supplements (omega-3)	DHA%	200060	4.11×10⁻⁸	Gene×FOS interaction (high LD with FADS)	β_interaction=-0.0390	Cross-sectional GWIS	Ihejirika SA, Chiang AH, Singh A, Stephen E, Chen H, Ye K. A multi-level gene-diet interaction analysis of fish oil and 14 polyunsaturated fatty acid traits identifies the FADS and GPR12 loci. HGG Adv. 2025 Jul 10;6(3):100459. doi: 10.1016/j.xhgg.2025.100459. Epub 2025 May 21. PMID: 40405463; PMCID: PMC12172259.
FADS2	rs2072114	Plasma ALA/LA	HDL-C	192	0.238	Low ALA/LA: +0.044 mmol/L per A (P=0.009)	High ALA/LA: +0.001 mmol/L per A (P=0.970)	Cross-sect T2D	P. C. Huang, H. Cheng, Y. T. Su, M. C. Huang, C. C. Hsu, S. J. Hwang, S. J. Shin and W. T. Chang, Interaction among dietary n-3 and n-6 polyunsaturated fatty acid intake, fatty acid desaturase 2 genetic variants, and low-density lipoprotein cholesterol levels in type 2 diabetes patients, J Diabetes Investig, 2023, 14, 297-308.
FADS2	rs174602	Plasma ALA/LA	LDL-C	192	0.063	Low ALA/LA: +0.349 mmol/L per A (P=0.016)	High ALA/LA: +0.275 mmol/L per A (P=0.015)	Cross-sect T2D	P. C. Huang, H. Cheng, Y. T. Su, M. C. Huang, C. C. Hsu, S. J. Hwang, S. J. Shin and W. T. Chang, Interaction among dietary n-3 and n-6 polyunsaturated fatty acid intake, fatty acid desaturase 2 genetic variants, and low-density lipoprotein cholesterol levels in type 2 diabetes patients, J Diabetes Investig, 2023, 14, 297-308.
FADS2	rs2072114	Plasma ALA/LA	LDL-C	192	0.016	Low ALA/LA: +0.380 mmol/L per A (P=0.002)	High ALA/LA: -0.138 mmol/L per A (P=0.338)	Cross-sect T2D	P. C. Huang, H. Cheng, Y. T. Su, M. C. Huang, C. C. Hsu, S. J. Hwang, S. J. Shin and W. T. Chang, Interaction among dietary n-3 and n-6 polyunsaturated fatty acid intake, fatty acid desaturase 2 genetic variants, and low-density lipoprotein cholesterol levels in type 2 diabetes patients, J Diabetes Investig, 2023, 14, 297-308.
FADS2	rs174602	Plasma ALA/LA	Total chol	192	0.082	Low ALA/LA: +0.442 mmol/L per A (P=0.003)	High ALA/LA: +0.259 mmol/L per A (P=0.033)	Cross-sect T2D	P. C. Huang, H. Cheng, Y. T. Su, M. C. Huang, C. C. Hsu, S. J. Hwang, S. J. Shin and W. T. Chang, Interaction among dietary n-3 and n-6 polyunsaturated fatty acid intake, fatty acid desaturase 2 genetic variants, and low-density lipoprotein cholesterol levels in type 2 diabetes patients, J Diabetes Investig, 2023, 14, 297-308.
FADS2	rs2072114	Plasma ALA/LA	Total chol	192	0.003	Low ALA/LA: +0.377 mmol/L per A (P=0.005)	High ALA/LA: -0.235 mmol/L per A (P=0.130)	Cross-sect T2D	P. C. Huang, H. Cheng, Y. T. Su, M. C. Huang, C. C. Hsu, S. J. Hwang, S. J. Shin and W. T. Chang, Interaction among dietary n-3 and n-6 polyunsaturated fatty acid intake, fatty acid desaturase 2 genetic variants, and low-density lipoprotein cholesterol levels in type 2 diabetes patients, J Diabetes Investig, 2023, 14, 297-308.
FADS2	rs66698963	Plasma DHA	TG/HDL ratio	1504	<0.0001	I/I: Strong	D/D: Weak	Cohort	P. Li, J. Zhao, K. S. D. Kothapalli, X. Li, H. Li, Y. Han, S. Mi, W. Zhao, Q. Li, H. Zhang, Y. Song, J. T. Brenna and Y. Gao, A regulatory insertion-deletion polymorphism in the FADS gene cluster influences PUFA and lipid profiles among Chinese adults: a population-based study, Am J Clin Nutr, 2018, 107, 867-875.
FADS2	rs66698963 (I/D)	Plasma EPA	TG/HDL ratio	1504	<0.0001	I/I: High assoc	D/D: Low assoc	Cohort	P. Li, J. Zhao, K. S. D. Kothapalli, X. Li, H. Li, Y. Han, S. Mi, W. Zhao, Q. Li, H. Zhang, Y. Song, J. T. Brenna and Y. Gao, A regulatory insertion-deletion polymorphism in the FADS gene cluster influences PUFA and lipid profiles among Chinese adults: a population-based study, Am J Clin Nutr, 2018, 107, 867-875.
FADS2	rs174602	Plasma n-3/n-6	HDL-C	192	0.346	Low n-3/n-6: +0.040 mmol/L per A (P=0.027)	High n-3/n-6: +0.008 mmol/L per A (P=0.593)	Cross-sect T2D	P. C. Huang, H. Cheng, Y. T. Su, M. C. Huang, C. C. Hsu, S. J. Hwang, S. J. Shin and W. T. Chang, Interaction among dietary n-3 and n-6 polyunsaturated fatty acid intake, fatty acid desaturase 2 genetic variants, and low-density lipoprotein cholesterol levels in type 2 diabetes patients, J Diabetes Investig, 2023, 14, 297-308.
FADS2	rs2072114	Plasma n-3/n-6	HDL-C	192	0.157	Low n-3/n-6: +0.035 mmol/L per A (P=0.050)	High n-3/n-6: +0.004 mmol/L per A (P=0.806)	Cross-sect T2D	P. C. Huang, H. Cheng, Y. T. Su, M. C. Huang, C. C. Hsu, S. J. Hwang, S. J. Shin and W. T. Chang, Interaction among dietary n-3 and n-6 polyunsaturated fatty acid intake, fatty acid desaturase 2 genetic variants, and low-density lipoprotein cholesterol levels in type 2 diabetes patients, J Diabetes Investig, 2023, 14, 297-308.
FADS2	rs174602	Plasma n-3/n-6	LDL-C	192	0.636	Low n-3/n-6: +0.412 mmol/L per A (P=0.005)	High n-3/n-6: +0.232 mmol/L per A (P=0.027)	Cross-sect T2D	P. C. Huang, H. Cheng, Y. T. Su, M. C. Huang, C. C. Hsu, S. J. Hwang, S. J. Shin and W. T. Chang, Interaction among dietary n-3 and n-6 polyunsaturated fatty acid intake, fatty acid desaturase 2 genetic variants, and low-density lipoprotein cholesterol levels in type 2 diabetes patients, J Diabetes Investig, 2023, 14, 297-308.
FADS2	rs2072114	Plasma n-3/n-6	LDL-C	192	0.512	Low n-3/n-6: +0.263 mmol/L per A (P=0.078)	High n-3/n-6: +0.051 mmol/L per A (P=0.649)	Cross-sect T2D	P. C. Huang, H. Cheng, Y. T. Su, M. C. Huang, C. C. Hsu, S. J. Hwang, S. J. Shin and W. T. Chang, Interaction among dietary n-3 and n-6 polyunsaturated fatty acid intake, fatty acid desaturase 2 genetic variants, and low-density lipoprotein cholesterol levels in type 2 diabetes patients, J Diabetes Investig, 2023, 14, 297-308.
FADS2	rs2072114	Plasma n-3/n-6	Total chol	192	0.627	Low n-3/n-6: +0.234 mmol/L per A (P=0.128)	High n-3/n-6: +0.007 mmol/L per A (P=0.954)	Cross-sect T2D	P. C. Huang, H. Cheng, Y. T. Su, M. C. Huang, C. C. Hsu, S. J. Hwang, S. J. Shin and W. T. Chang, Interaction among dietary n-3 and n-6 polyunsaturated fatty acid intake, fatty acid desaturase 2 genetic variants, and low-density lipoprotein cholesterol levels in type 2 diabetes patients, J Diabetes Investig, 2023, 14, 297-308.
FADS2	rs174602	Plasma n-3/n-6	Total chol	192	0.560	Low n-3/n-6: +0.438 mmol/L per A (P=0.003)	High n-3/n-6: +0.250 mmol/L per A (P=0.031)	Cross-sect T2D	P. C. Huang, H. Cheng, Y. T. Su, M. C. Huang, C. C. Hsu, S. J. Hwang, S. J. Shin and W. T. Chang, Interaction among dietary n-3 and n-6 polyunsaturated fatty acid intake, fatty acid desaturase 2 genetic variants, and low-density lipoprotein cholesterol levels in type 2 diabetes patients, J Diabetes Investig, 2023, 14, 297-308.
FADS2	rs3834458 (TT vs -T--)	n3:n6 PUFA ratio (>median)	Crohn's disease risk	101 cases 495 controls	0.88	TT: OR=1.28 (95% CI 0.69-2.36)	-T--: OR=0.93 (95% CI 0.41-2.13)	Nested case-control	A. N. Ananthakrishnan, H. Khalili, M. Song, L. M. Higuchi, P. Lochhead, J. M. Richter and A. T. Chan, Genetic Polymorphisms in Fatty Acid Metabolism Modify the Association Between Dietary n3: n6 Intake and Risk of Ulcerative Colitis: A Prospective Cohort Study, Inflamm Bowel Dis, 2017, 23, 1898-1904.
FADS2	rs174575 (CC vs CG/GG)	n3:n6 PUFA ratio (>median)	Crohn's disease risk	101 cases 495 controls	0.07	CC: OR=1.83 (95% CI 0.82-4.10)	CG/GG: OR=0.82 (95% CI 0.44-1.55)	Nested case-control	A. N. Ananthakrishnan, H. Khalili, M. Song, L. M. Higuchi, P. Lochhead, J. M. Richter and A. T. Chan, Genetic Polymorphisms in Fatty Acid Metabolism Modify the Association Between Dietary n3: n6 Intake and Risk of Ulcerative Colitis: A Prospective Cohort Study, Inflamm Bowel Dis, 2017, 23, 1898-1904.
FADS2	rs3834458 (TT vs -T--)	n3:n6 PUFA ratio (>median)	Ulcerative colitis risk	139 cases 495 controls	0.56	TT: OR=0.70 (95% CI 0.38-1.29)	-T--: OR=0.48 (95% CI 0.23-0.96)	Nested case-control	A. N. Ananthakrishnan, H. Khalili, M. Song, L. M. Higuchi, P. Lochhead, J. M. Richter and A. T. Chan, Genetic Polymorphisms in Fatty Acid Metabolism Modify the Association Between Dietary n3: n6 Intake and Risk of Ulcerative Colitis: A Prospective Cohort Study, Inflamm Bowel Dis, 2017, 23, 1898-1904.
FADS2	rs174575 (CC vs CG/GG)	n3:n6 PUFA ratio (>median)	Ulcerative colitis risk	139 cases 495 controls	0.30	CC: OR=0.74 (95% CI 0.34-1.59)	CG/GG: OR=0.61 (95% CI 0.35-1.07)	Nested case-control	A. N. Ananthakrishnan, H. Khalili, M. Song, L. M. Higuchi, P. Lochhead, J. M. Richter and A. T. Chan, Genetic Polymorphisms in Fatty Acid Metabolism Modify the Association Between Dietary n3: n6 Intake and Risk of Ulcerative Colitis: A Prospective Cohort Study, Inflamm Bowel Dis, 2017, 23, 1898-1904.
FADS3	rs174448	Non-DHA omega-3	Atopic dermatitis	250040	>0.05	GA/AA Q4: HR ~0.67 vs ref	GG Q4: HR ~0.68 vs ref	Cohort 14.4y	R. Mao, X. Meng, T. Zhang, F. Wang, Y. Zhong and J. Li, Evaluating the Impact of Omega-3 Fatty Acids and Genetic Susceptibility on Atopic Dermatitis in Adults, Mol Nutr Food Res, 2025, 69, e70002.
FADS3	rs174448	Omega-6/omega-3 ratio	Atopic dermatitis	250040	>0.05	GA/AA Q1: HR ~0.73 vs ref	GG Q1: HR ~0.70 vs ref	Cohort 14.4y	R. Mao, X. Meng, T. Zhang, F. Wang, Y. Zhong and J. Li, Evaluating the Impact of Omega-3 Fatty Acids and Genetic Susceptibility on Atopic Dermatitis in Adults, Mol Nutr Food Res, 2025, 69, e70002.
FADS3	rs174448	Plasma omega-3	Atopic dermatitis	250040	>0.05	GA/AA Q4: HR ~0.58 vs ref	GG Q4: HR ~0.72 vs ref	Cohort 14.4y	R. Mao, X. Meng, T. Zhang, F. Wang, Y. Zhong and J. Li, Evaluating the Impact of Omega-3 Fatty Acids and Genetic Susceptibility on Atopic Dermatitis in Adults, Mol Nutr Food Res, 2025, 69, e70002.
FFAR4	All 12 SNPs	Fish oil 1.9-2.2g EPA+1.1g DHA/d	Fasting glucose	210	NS	No gene-diet interaction observed	All SNPs tested	Single-arm intervention	B. Vallee Marcotte, H. Cormier, I. Rudkowska, S. Lemieux, P. Couture and M. C. Vohl, Polymorphisms in FFAR4 (GPR120) Gene Modulate Insulin Levels and Sensitivity after Fish Oil Supplementation, J Pers Med, 2017, 7.
FFAR4	rs11187515	Fish oil 1.9-2.2g EPA+1.1g DHA/d	Fasting insulin	210	NS	No interaction	Tested but NS	Single-arm intervention	B. Vallee Marcotte, H. Cormier, I. Rudkowska, S. Lemieux, P. Couture and M. C. Vohl, Polymorphisms in FFAR4 (GPR120) Gene Modulate Insulin Levels and Sensitivity after Fish Oil Supplementation, J Pers Med, 2017, 7.
FFAR4	rs11187537	Fish oil 1.9-2.2g EPA+1.1g DHA/d	Fasting insulin	210	0.0045	GG (n=104): ~95→~80 pmol/L (-15)	CG+CC (n=104): ~78→~82 pmol/L (+4)	Single-arm intervention	B. Vallee Marcotte, H. Cormier, I. Rudkowska, S. Lemieux, P. Couture and M. C. Vohl, Polymorphisms in FFAR4 (GPR120) Gene Modulate Insulin Levels and Sensitivity after Fish Oil Supplementation, J Pers Med, 2017, 7.
FFAR4	rs1414929	Fish oil 1.9-2.2g EPA+1.1g DHA/d	Fasting insulin	210	NS	No interaction	Tested but NS	Single-arm intervention	B. Vallee Marcotte, H. Cormier, I. Rudkowska, S. Lemieux, P. Couture and M. C. Vohl, Polymorphisms in FFAR4 (GPR120) Gene Modulate Insulin Levels and Sensitivity after Fish Oil Supplementation, J Pers Med, 2017, 7.
FFAR4	rs2065875	Fish oil 1.9-2.2g EPA+1.1g DHA/d	Fasting insulin	210	NS	No interaction	Tested but NS	Single-arm intervention	B. Vallee Marcotte, H. Cormier, I. Rudkowska, S. Lemieux, P. Couture and M. C. Vohl, Polymorphisms in FFAR4 (GPR120) Gene Modulate Insulin Levels and Sensitivity after Fish Oil Supplementation, J Pers Med, 2017, 7.
FFAR4	rs17108973	Fish oil 1.9-2.2g EPA+1.1g DHA/d	Fasting insulin	210	0.0012	CC (n=130): ~88→~70 pmol/L (-18)	CT+TT (n=78): ~75→~82 pmol/L (+7)	Single-arm intervention	B. Vallee Marcotte, H. Cormier, I. Rudkowska, S. Lemieux, P. Couture and M. C. Vohl, Polymorphisms in FFAR4 (GPR120) Gene Modulate Insulin Levels and Sensitivity after Fish Oil Supplementation, J Pers Med, 2017, 7.
FFAR4	rs17484310	Fish oil 1.9-2.2g EPA+1.1g DHA/d	Fasting insulin	210	0.031	T/T (n=156): ~90→~80 pmol/L (-10)	A/T+A/A (n=52): ~70→~75 pmol/L (+5)	Single-arm intervention	B. Vallee Marcotte, H. Cormier, I. Rudkowska, S. Lemieux, P. Couture and M. C. Vohl, Polymorphisms in FFAR4 (GPR120) Gene Modulate Insulin Levels and Sensitivity after Fish Oil Supplementation, J Pers Med, 2017, 7.
FFAR4	rs12415204	Fish oil 1.9-2.2g EPA+1.1g DHA/d	Fasting insulin	210	NS	No interaction	Tested but NS	Single-arm intervention	B. Vallee Marcotte, H. Cormier, I. Rudkowska, S. Lemieux, P. Couture and M. C. Vohl, Polymorphisms in FFAR4 (GPR120) Gene Modulate Insulin Levels and Sensitivity after Fish Oil Supplementation, J Pers Med, 2017, 7.
FFAR4	rs7081686	Fish oil 1.9-2.2g EPA+1.1g DHA/d	Fasting insulin	210	0.018	T/T (n=107): ~92→~85 pmol/L (-7)	C/T+C/C (n=101): ~80→~82 pmol/L (+2)	Single-arm intervention	B. Vallee Marcotte, H. Cormier, I. Rudkowska, S. Lemieux, P. Couture and M. C. Vohl, Polymorphisms in FFAR4 (GPR120) Gene Modulate Insulin Levels and Sensitivity after Fish Oil Supplementation, J Pers Med, 2017, 7.
FFAR4	rs12219199	Fish oil 1.9-2.2g EPA+1.1g DHA/d	Fasting insulin	210	NS	No interaction	Tested but NS	Single-arm intervention	B. Vallee Marcotte, H. Cormier, I. Rudkowska, S. Lemieux, P. Couture and M. C. Vohl, Polymorphisms in FFAR4 (GPR120) Gene Modulate Insulin Levels and Sensitivity after Fish Oil Supplementation, J Pers Med, 2017, 7.
FFAR4	rs11187527	Fish oil 1.9-2.2g EPA+1.1g DHA/d	Fasting insulin	210	NS	No interaction	Tested but NS	Single-arm intervention	B. Vallee Marcotte, H. Cormier, I. Rudkowska, S. Lemieux, P. Couture and M. C. Vohl, Polymorphisms in FFAR4 (GPR120) Gene Modulate Insulin Levels and Sensitivity after Fish Oil Supplementation, J Pers Med, 2017, 7.
FFAR4	rs11187529	Fish oil 1.9-2.2g EPA+1.1g DHA/d	Fasting insulin	210	NS	No interaction	Tested but NS	Single-arm intervention	B. Vallee Marcotte, H. Cormier, I. Rudkowska, S. Lemieux, P. Couture and M. C. Vohl, Polymorphisms in FFAR4 (GPR120) Gene Modulate Insulin Levels and Sensitivity after Fish Oil Supplementation, J Pers Med, 2017, 7.
FFAR4	rs11187534	Fish oil 1.9-2.2g EPA+1.1g DHA/d	Fasting insulin	210	NS	No interaction	Tested but NS	Single-arm intervention	B. Vallee Marcotte, H. Cormier, I. Rudkowska, S. Lemieux, P. Couture and M. C. Vohl, Polymorphisms in FFAR4 (GPR120) Gene Modulate Insulin Levels and Sensitivity after Fish Oil Supplementation, J Pers Med, 2017, 7.
FFAR4	rs11187534	Fish oil 1.9-2.2g EPA+1.1g DHA/d	HOMA-IR	210	NS	No interaction	Tested but NS	Single-arm intervention	B. Vallee Marcotte, H. Cormier, I. Rudkowska, S. Lemieux, P. Couture and M. C. Vohl, Polymorphisms in FFAR4 (GPR120) Gene Modulate Insulin Levels and Sensitivity after Fish Oil Supplementation, J Pers Med, 2017, 7.
FFAR4	rs11187515	Fish oil 1.9-2.2g EPA+1.1g DHA/d	HOMA-IR	210	NS	No interaction	Tested but NS	Single-arm intervention	B. Vallee Marcotte, H. Cormier, I. Rudkowska, S. Lemieux, P. Couture and M. C. Vohl, Polymorphisms in FFAR4 (GPR120) Gene Modulate Insulin Levels and Sensitivity after Fish Oil Supplementation, J Pers Med, 2017, 7.
FFAR4	rs11187529	Fish oil 1.9-2.2g EPA+1.1g DHA/d	HOMA-IR	210	NS	No interaction	Tested but NS	Single-arm intervention	B. Vallee Marcotte, H. Cormier, I. Rudkowska, S. Lemieux, P. Couture and M. C. Vohl, Polymorphisms in FFAR4 (GPR120) Gene Modulate Insulin Levels and Sensitivity after Fish Oil Supplementation, J Pers Med, 2017, 7.
FFAR4	rs1414929	Fish oil 1.9-2.2g EPA+1.1g DHA/d	HOMA-IR	210	NS	No interaction	Tested but NS	Single-arm intervention	B. Vallee Marcotte, H. Cormier, I. Rudkowska, S. Lemieux, P. Couture and M. C. Vohl, Polymorphisms in FFAR4 (GPR120) Gene Modulate Insulin Levels and Sensitivity after Fish Oil Supplementation, J Pers Med, 2017, 7.
FFAR4	rs17108973	Fish oil 1.9-2.2g EPA+1.1g DHA/d	HOMA-IR	210	0.003	CC (n=130): ~3.0→~2.7 (-0.3)	CT+TT (n=78): ~2.5→~2.7 (+0.2)	Single-arm intervention	B. Vallee Marcotte, H. Cormier, I. Rudkowska, S. Lemieux, P. Couture and M. C. Vohl, Polymorphisms in FFAR4 (GPR120) Gene Modulate Insulin Levels and Sensitivity after Fish Oil Supplementation, J Pers Med, 2017, 7.
FFAR4	rs17484310	Fish oil 1.9-2.2g EPA+1.1g DHA/d	HOMA-IR	210	0.038	T/T (n=156): ~3.0→~2.8 (-0.2)	A/T+A/A (n=52): ~2.3→~2.5 (+0.2)	Single-arm intervention	B. Vallee Marcotte, H. Cormier, I. Rudkowska, S. Lemieux, P. Couture and M. C. Vohl, Polymorphisms in FFAR4 (GPR120) Gene Modulate Insulin Levels and Sensitivity after Fish Oil Supplementation, J Pers Med, 2017, 7.
FFAR4	rs7081686	Fish oil 1.9-2.2g EPA+1.1g DHA/d	HOMA-IR	210	0.0499	T/T (n=107): ~3.0→~2.6 (-0.4)	C/T+C/C (n=101): ~2.6→~2.6 (no change)	Single-arm intervention	B. Vallee Marcotte, H. Cormier, I. Rudkowska, S. Lemieux, P. Couture and M. C. Vohl, Polymorphisms in FFAR4 (GPR120) Gene Modulate Insulin Levels and Sensitivity after Fish Oil Supplementation, J Pers Med, 2017, 7.
FFAR4	rs2065875	Fish oil 1.9-2.2g EPA+1.1g DHA/d	HOMA-IR	210	NS	No interaction	Tested but NS	Single-arm intervention	B. Vallee Marcotte, H. Cormier, I. Rudkowska, S. Lemieux, P. Couture and M. C. Vohl, Polymorphisms in FFAR4 (GPR120) Gene Modulate Insulin Levels and Sensitivity after Fish Oil Supplementation, J Pers Med, 2017, 7.
FFAR4	rs12415204	Fish oil 1.9-2.2g EPA+1.1g DHA/d	HOMA-IR	210	NS	No interaction	Tested but NS	Single-arm intervention	B. Vallee Marcotte, H. Cormier, I. Rudkowska, S. Lemieux, P. Couture and M. C. Vohl, Polymorphisms in FFAR4 (GPR120) Gene Modulate Insulin Levels and Sensitivity after Fish Oil Supplementation, J Pers Med, 2017, 7.
FFAR4	rs12219199	Fish oil 1.9-2.2g EPA+1.1g DHA/d	HOMA-IR	210	NS	No interaction	Tested but NS	Single-arm intervention	B. Vallee Marcotte, H. Cormier, I. Rudkowska, S. Lemieux, P. Couture and M. C. Vohl, Polymorphisms in FFAR4 (GPR120) Gene Modulate Insulin Levels and Sensitivity after Fish Oil Supplementation, J Pers Med, 2017, 7.
FFAR4	rs11187537	Fish oil 1.9-2.2g EPA+1.1g DHA/d	HOMA-IR	210	0.015	GG (n=104): ~3.2→~2.8 (-0.4)	CG+CC (n=104): ~2.5→~2.7 (+0.2)	Single-arm intervention	B. Vallee Marcotte, H. Cormier, I. Rudkowska, S. Lemieux, P. Couture and M. C. Vohl, Polymorphisms in FFAR4 (GPR120) Gene Modulate Insulin Levels and Sensitivity after Fish Oil Supplementation, J Pers Med, 2017, 7.
FFAR4	rs11187527	Fish oil 1.9-2.2g EPA+1.1g DHA/d	HOMA-IR	210	NS	No interaction	Tested but NS	Single-arm intervention	B. Vallee Marcotte, H. Cormier, I. Rudkowska, S. Lemieux, P. Couture and M. C. Vohl, Polymorphisms in FFAR4 (GPR120) Gene Modulate Insulin Levels and Sensitivity after Fish Oil Supplementation, J Pers Med, 2017, 7.
GALNT18	rs10741544	RBC Omega-3 Index (EPA+DHA)	TMT A	1620	5.5e-06	β interaction = -0.12	See Table 4 in Annevelink et al. 2024 for detailed effects by genotype	Cross-sect	C. E. Annevelink, J. Westra, A. Sala-Vila, W. S. Harris, N. L. Tintle and G. C. Shearer, A Genome-Wide Interaction Study of Erythrocyte omega-3 Polyunsaturated Fatty Acid Species and Memory in the Framingham Heart Study Offspring Cohort, J Nutr, 2024, 154, 1640-1651.
GCKR	rs1260326 (P446L)	Plasma n-3 PUFA	C-peptide	379	P<0.05	Low n-3 PUFA: C/C had HIGHER C-peptide than C/T+T/T (P=0.004)	High n-3 PUFA: C/C had LOWER C-peptide than C/T+T/T (crossover interaction)	Cross-sect MetS (LIPGENE)	P. Perez-Martinez, J. Delgado-Lista, A. Garcia-Rios, J. Mc Monagle, H. L. Gulseth, J. M. Ordovas, D. I. Shaw, B. Karlström, B. Kiec-Wilk, E. E. Blaak, O. Helal, M. Malczewska-Malec, C. Defoort, U. Risérus, W. H. M. Saris, J. A. Lovegrove, C. A. Drevon, H. M. Roche and J. Lopez-Miranda, Glucokinase Regulatory Protein Genetic Variant Interacts with Omega-3 PUFA to Influence Insulin Resistance and I…
GCKR	rs1260326 (P446L)	Plasma n-3 PUFA	CRP (inflammation)	379	0.032	Low n-3 PUFA: C/C had HIGHER CRP (more inflammation) than C/T+T/T (P=0.032)	High n-3 PUFA: C/C had LOWER CRP (less inflammation) than C/T+T/T (crossover interaction)	Cross-sect MetS (LIPGENE)	P. Perez-Martinez, J. Delgado-Lista, A. Garcia-Rios, J. Mc Monagle, H. L. Gulseth, J. M. Ordovas, D. I. Shaw, B. Karlström, B. Kiec-Wilk, E. E. Blaak, O. Helal, M. Malczewska-Malec, C. Defoort, U. Risérus, W. H. M. Saris, J. A. Lovegrove, C. A. Drevon, H. M. Roche and J. Lopez-Miranda, Glucokinase Regulatory Protein Genetic Variant Interacts with Omega-3 PUFA to Influence Insulin Resistance and I…
GCKR	rs1260326 (P446L, Pro446Leu)	Plasma n-3 PUFA	Fasting insulin	379	P<0.05	Low n-3 PUFA (≤3.68% of total lipids): C/C genotype had HIGHER fasting insulin than C/T+T/T carriers (P=0.019)	High n-3 PUFA (>3.68%): C/C genotype had LOWER fasting insulin than C/T+T/T carriers (crossover interaction)	Cross-sect MetS (LIPGENE)	P. Perez-Martinez, J. Delgado-Lista, A. Garcia-Rios, J. Mc Monagle, H. L. Gulseth, J. M. Ordovas, D. I. Shaw, B. Karlström, B. Kiec-Wilk, E. E. Blaak, O. Helal, M. Malczewska-Malec, C. Defoort, U. Risérus, W. H. M. Saris, J. A. Lovegrove, C. A. Drevon, H. M. Roche and J. Lopez-Miranda, Glucokinase Regulatory Protein Genetic Variant Interacts with Omega-3 PUFA to Influence Insulin Resistance and I…
GCKR	rs1260326 (P446L)	Plasma n-3 PUFA	HOMA-IR	379	P<0.05	Low n-3 PUFA: C/C had HIGHER HOMA-IR (worse insulin resistance) than C/T+T/T (P=0.008)	High n-3 PUFA: C/C had LOWER HOMA-IR (better insulin sensitivity) than C/T+T/T. T-allele carriers are "high responders" to n-3 PUFA	Cross-sect MetS (LIPGENE)	P. Perez-Martinez, J. Delgado-Lista, A. Garcia-Rios, J. Mc Monagle, H. L. Gulseth, J. M. Ordovas, D. I. Shaw, B. Karlström, B. Kiec-Wilk, E. E. Blaak, O. Helal, M. Malczewska-Malec, C. Defoort, U. Risérus, W. H. M. Saris, J. A. Lovegrove, C. A. Drevon, H. M. Roche and J. Lopez-Miranda, Glucokinase Regulatory Protein Genetic Variant Interacts with Omega-3 PUFA to Influence Insulin Resistance and I…
GPA33	rs10918620	RBC ALA	TMT B	1620	4.6e-06	β interaction = -0.29	See Table 4 in Annevelink et al. 2024 for detailed effects by genotype	Cross-sect	C. E. Annevelink, J. Westra, A. Sala-Vila, W. S. Harris, N. L. Tintle and G. C. Shearer, A Genome-Wide Interaction Study of Erythrocyte omega-3 Polyunsaturated Fatty Acid Species and Memory in the Framingham Heart Study Offspring Cohort, J Nutr, 2024, 154, 1640-1651.
GPA33	rs10918620	RBC ALA	TMT D	1620	5.5e-06	β interaction = -0.26	See Table 4 in Annevelink et al. 2024 for detailed effects by genotype	Cross-sect	C. E. Annevelink, J. Westra, A. Sala-Vila, W. S. Harris, N. L. Tintle and G. C. Shearer, A Genome-Wide Interaction Study of Erythrocyte omega-3 Polyunsaturated Fatty Acid Species and Memory in the Framingham Heart Study Offspring Cohort, J Nutr, 2024, 154, 1640-1651.
GPR12	Gene-level (MAGMA)	Fish oil supplements (omega-3)	PUFAs%	200060	<2.66×10⁻⁶	Gene-level aggregate significant	Top SNP rs1752653: βG=0.03 (FOS) vs βG=-0.01 (no FOS)	Cross-sectional GWIS	Ihejirika SA, Chiang AH, Singh A, Stephen E, Chen H, Ye K. A multi-level gene-diet interaction analysis of fish oil and 14 polyunsaturated fatty acid traits identifies the FADS and GPR12 loci. HGG Adv. 2025 Jul 10;6(3):100459. doi: 10.1016/j.xhgg.2025.100459. Epub 2025 May 21. PMID: 40405463; PMCID: PMC12172259.
GPR12	Gene-level (MAGMA)	Fish oil supplements (omega-3)	PUFAs:MUFAs ratio	200060	<2.66×10⁻⁶	Gene-level aggregate significant	Novel locus for PUFA metabolism	Cross-sectional GWIS	Ihejirika SA, Chiang AH, Singh A, Stephen E, Chen H, Ye K. A multi-level gene-diet interaction analysis of fish oil and 14 polyunsaturated fatty acid traits identifies the FADS and GPR12 loci. HGG Adv. 2025 Jul 10;6(3):100459. doi: 10.1016/j.xhgg.2025.100459. Epub 2025 May 21. PMID: 40405463; PMCID: PMC12172259.
GRS (3-SNP)	MC4R/CAV-1/Cry-1	N6/N3 ratio (age/energy adj)	MUO phenotype	279	0.057	GRS continuous: β=2.00 [-0.05,4.05]	Per-unit GRS	Cross-sect	N. Rasaei, S. F. Fatemi, F. Gholami, M. Samadi, M. K. Mohammadian, E. Daneshzad and K. Mirzaei, Interaction of genetics risk score and fatty acids quality indices on healthy and unhealthy obesity phenotype, BMC Med Genomics, 2025, 18, 16.
GRS (3-SNP)	MC4R/CAV-1/Cry-1	N6/N3 ratio (crude)	MUO phenotype	279	0.058	GRS continuous: β=1.92 [-0.06,3.91]	Per-unit GRS	Cross-sect	N. Rasaei, S. F. Fatemi, F. Gholami, M. Samadi, M. K. Mohammadian, E. Daneshzad and K. Mirzaei, Interaction of genetics risk score and fatty acids quality indices on healthy and unhealthy obesity phenotype, BMC Med Genomics, 2025, 18, 16.
GRS (3-SNP)	MC4R/CAV-1/Cry-1	N6/N3 ratio (fully adj)	MUO phenotype	279	0.049	GRS continuous: β=2.26 [0.008,4.52]	Per-unit GRS	Cross-sect	N. Rasaei, S. F. Fatemi, F. Gholami, M. Samadi, M. K. Mohammadian, E. Daneshzad and K. Mirzaei, Interaction of genetics risk score and fatty acids quality indices on healthy and unhealthy obesity phenotype, BMC Med Genomics, 2025, 18, 16.
GRS (3-SNP)	MC4R/CAV-1/Cry-1	N6/N3 ratio T2	BF%	279	0.464	T3 GRS: β=1.69 [-2.83,6.21]	T1 GRS: Ref	Cross-sect	N. Rasaei, E. Daneshzad, A. Khadem, F. Gholami, M. Samadi and K. Mirzaei, Investigation of the interaction between genetic risk score (GRS) and fatty acid quality indices on metabolic syndrome among overweight and obese women, BMC Med Genomics, 2024, 17, 113.
GRS (3-SNP)	MC4R/CAV-1/Cry-1	N6/N3 ratio T2	BF%	279	0.107	T2 GRS: β=3.49 [-0.75,7.74]	T1 GRS: Ref	Cross-sect	N. Rasaei, E. Daneshzad, A. Khadem, F. Gholami, M. Samadi and K. Mirzaei, Investigation of the interaction between genetic risk score (GRS) and fatty acid quality indices on metabolic syndrome among overweight and obese women, BMC Med Genomics, 2024, 17, 113.
GRS (3-SNP)	MC4R/CAV-1/Cry-1	N6/N3 ratio T2	DBP (mmHg)	279	0.888	T3 GRS: β=-0.56 [-8.41,7.29]	T1 GRS: Ref	Cross-sect	N. Rasaei, E. Daneshzad, A. Khadem, F. Gholami, M. Samadi and K. Mirzaei, Investigation of the interaction between genetic risk score (GRS) and fatty acid quality indices on metabolic syndrome among overweight and obese women, BMC Med Genomics, 2024, 17, 113.
GRS (3-SNP)	MC4R/CAV-1/Cry-1	N6/N3 ratio T2	DBP (mmHg)	279	0.083	T3 GRS: β=5.93 [-0.76,12.63]	T1 GRS: Ref	Cross-sect	N. Rasaei, E. Daneshzad, A. Khadem, F. Gholami, M. Samadi and K. Mirzaei, Investigation of the interaction between genetic risk score (GRS) and fatty acid quality indices on metabolic syndrome among overweight and obese women, BMC Med Genomics, 2024, 17, 113.
GRS (3-SNP)	MC4R/CAV-1/Cry-1	N6/N3 ratio T2	FBS (mg/dl)	279	0.073	T3 GRS: β=6.47 [-0.59,13.53]	T1 GRS: Ref	Cross-sect	N. Rasaei, E. Daneshzad, A. Khadem, F. Gholami, M. Samadi and K. Mirzaei, Investigation of the interaction between genetic risk score (GRS) and fatty acid quality indices on metabolic syndrome among overweight and obese women, BMC Med Genomics, 2024, 17, 113.
GRS (3-SNP)	MC4R/CAV-1/Cry-1	N6/N3 ratio T2	FBS (mg/dl)	279	0.740	T2 GRS: β=0.48 [-7.18,8.16]	T1 GRS: Ref	Cross-sect	N. Rasaei, E. Daneshzad, A. Khadem, F. Gholami, M. Samadi and K. Mirzaei, Investigation of the interaction between genetic risk score (GRS) and fatty acid quality indices on metabolic syndrome among overweight and obese women, BMC Med Genomics, 2024, 17, 113.
GRS (3-SNP)	MC4R/CAV-1/Cry-1	N6/N3 ratio T2	FBS (mg/dl)	279	0.715	T3 GRS: β=1.45 [-6.35,9.25]	T1 GRS: Ref	Cross-sect	N. Rasaei, E. Daneshzad, A. Khadem, F. Gholami, M. Samadi and K. Mirzaei, Investigation of the interaction between genetic risk score (GRS) and fatty acid quality indices on metabolic syndrome among overweight and obese women, BMC Med Genomics, 2024, 17, 113.
GRS (3-SNP)	MC4R/CAV-1/Cry-1	N6/N3 ratio T2	HDL (mg/dl)	279	0.152	T3 GRS: β=-6.85 [-16.23,2.51]	T1 GRS: Ref	Cross-sect	N. Rasaei, E. Daneshzad, A. Khadem, F. Gholami, M. Samadi and K. Mirzaei, Investigation of the interaction between genetic risk score (GRS) and fatty acid quality indices on metabolic syndrome among overweight and obese women, BMC Med Genomics, 2024, 17, 113.
GRS (3-SNP)	MC4R/CAV-1/Cry-1	N6/N3 ratio T2	SBP (mmHg)	279	0.754	T2 GRS: β=1.67 [-8.78,12.14]	T1 GRS: Ref	Cross-sect	N. Rasaei, E. Daneshzad, A. Khadem, F. Gholami, M. Samadi and K. Mirzaei, Investigation of the interaction between genetic risk score (GRS) and fatty acid quality indices on metabolic syndrome among overweight and obese women, BMC Med Genomics, 2024, 17, 113.
GRS (3-SNP)	MC4R/CAV-1/Cry-1	N6/N3 ratio T2	SBP (mmHg)	279	0.925	T3 GRS: β=0.53 [-10.53,11.60]	T1 GRS: Ref	Cross-sect	N. Rasaei, E. Daneshzad, A. Khadem, F. Gholami, M. Samadi and K. Mirzaei, Investigation of the interaction between genetic risk score (GRS) and fatty acid quality indices on metabolic syndrome among overweight and obese women, BMC Med Genomics, 2024, 17, 113.
GRS (3-SNP)	MC4R/CAV-1/Cry-1	N6/N3 ratio T2	TG (mg/dl)	279	0.678	T3 GRS: β=13.21 [-49.11,75.54]	T1 GRS: Ref	Cross-sect	N. Rasaei, E. Daneshzad, A. Khadem, F. Gholami, M. Samadi and K. Mirzaei, Investigation of the interaction between genetic risk score (GRS) and fatty acid quality indices on metabolic syndrome among overweight and obese women, BMC Med Genomics, 2024, 17, 113.
GRS (3-SNP)	MC4R/CAV-1/Cry-1	N6/N3 ratio T2	WC (cm)	279	0.029	T2 GRS: β=7.95 [0.83,15.08]	T1 GRS: Ref	Cross-sect	N. Rasaei, E. Daneshzad, A. Khadem, F. Gholami, M. Samadi and K. Mirzaei, Investigation of the interaction between genetic risk score (GRS) and fatty acid quality indices on metabolic syndrome among overweight and obese women, BMC Med Genomics, 2024, 17, 113.
GRS (3-SNP)	MC4R/CAV-1/Cry-1	N6/N3 ratio T2	WC (cm)	279	0.740	T3 GRS: β=1.28 [-6.29,8.86]	T1 GRS: Ref	Cross-sect	N. Rasaei, E. Daneshzad, A. Khadem, F. Gholami, M. Samadi and K. Mirzaei, Investigation of the interaction between genetic risk score (GRS) and fatty acid quality indices on metabolic syndrome among overweight and obese women, BMC Med Genomics, 2024, 17, 113.
GRS (3-SNP)	MC4R/CAV-1/Cry-1	N6/N3 ratio T3	BF%	279	0.208	T3 GRS: β=2.42 [-1.35,6.19]	T1 GRS: Ref	Cross-sect	N. Rasaei, E. Daneshzad, A. Khadem, F. Gholami, M. Samadi and K. Mirzaei, Investigation of the interaction between genetic risk score (GRS) and fatty acid quality indices on metabolic syndrome among overweight and obese women, BMC Med Genomics, 2024, 17, 113.
GRS (3-SNP)	MC4R/CAV-1/Cry-1	N6/N3 ratio T3	BF%	279	0.695	T2 GRS: β=0.76 [-3.03,4.55]	T1 GRS: Ref	Cross-sect	N. Rasaei, E. Daneshzad, A. Khadem, F. Gholami, M. Samadi and K. Mirzaei, Investigation of the interaction between genetic risk score (GRS) and fatty acid quality indices on metabolic syndrome among overweight and obese women, BMC Med Genomics, 2024, 17, 113.
GRS (3-SNP)	MC4R/CAV-1/Cry-1	N6/N3 ratio T3	DBP (mmHg)	279	0.995	T3 GRS: β=-0.01 [-6.66,6.62]	T1 GRS: Ref	Cross-sect	N. Rasaei, E. Daneshzad, A. Khadem, F. Gholami, M. Samadi and K. Mirzaei, Investigation of the interaction between genetic risk score (GRS) and fatty acid quality indices on metabolic syndrome among overweight and obese women, BMC Med Genomics, 2024, 17, 113.
GRS (3-SNP)	MC4R/CAV-1/Cry-1	N6/N3 ratio T3	FBS (mg/dl)	279	0.268	T3 GRS: β=3.80 [-2.92,10.52]	T1 GRS: Ref	Cross-sect	N. Rasaei, E. Daneshzad, A. Khadem, F. Gholami, M. Samadi and K. Mirzaei, Investigation of the interaction between genetic risk score (GRS) and fatty acid quality indices on metabolic syndrome among overweight and obese women, BMC Med Genomics, 2024, 17, 113.
GRS (3-SNP)	MC4R/CAV-1/Cry-1	N6/N3 ratio T3	HDL (mg/dl)	279	0.549	T3 GRS: β=-2.42 [-10.34,5.50]	T1 GRS: Ref	Cross-sect	N. Rasaei, E. Daneshzad, A. Khadem, F. Gholami, M. Samadi and K. Mirzaei, Investigation of the interaction between genetic risk score (GRS) and fatty acid quality indices on metabolic syndrome among overweight and obese women, BMC Med Genomics, 2024, 17, 113.
GRS (3-SNP)	MC4R/CAV-1/Cry-1	N6/N3 ratio T3	HDL (mg/dl)	279	0.725	T2 GRS: β=-1.49 [-9.82,6.82]	T1 GRS: Ref	Cross-sect	N. Rasaei, E. Daneshzad, A. Khadem, F. Gholami, M. Samadi and K. Mirzaei, Investigation of the interaction between genetic risk score (GRS) and fatty acid quality indices on metabolic syndrome among overweight and obese women, BMC Med Genomics, 2024, 17, 113.
GRS (3-SNP)	MC4R/CAV-1/Cry-1	N6/N3 ratio T3	SBP (mmHg)	279	0.161	T3 GRS: β=-6.69 [-16.06,2.67]	T1 GRS: Ref	Cross-sect	N. Rasaei, E. Daneshzad, A. Khadem, F. Gholami, M. Samadi and K. Mirzaei, Investigation of the interaction between genetic risk score (GRS) and fatty acid quality indices on metabolic syndrome among overweight and obese women, BMC Med Genomics, 2024, 17, 113.
GRS (3-SNP)	MC4R/CAV-1/Cry-1	N6/N3 ratio T3	TG (mg/dl)	279	0.418	T2 GRS: β=22.86 [-32.48,78.20]	T1 GRS: Ref	Cross-sect	N. Rasaei, E. Daneshzad, A. Khadem, F. Gholami, M. Samadi and K. Mirzaei, Investigation of the interaction between genetic risk score (GRS) and fatty acid quality indices on metabolic syndrome among overweight and obese women, BMC Med Genomics, 2024, 17, 113.
GRS (3-SNP)	MC4R/CAV-1/Cry-1	N6/N3 ratio T3	TG (mg/dl)	279	0.043	T3 GRS: β=54.42 [1.76,107.08]	T1 GRS: Ref	Cross-sect	N. Rasaei, E. Daneshzad, A. Khadem, F. Gholami, M. Samadi and K. Mirzaei, Investigation of the interaction between genetic risk score (GRS) and fatty acid quality indices on metabolic syndrome among overweight and obese women, BMC Med Genomics, 2024, 17, 113.
GRS (3-SNP)	MC4R/CAV-1/Cry-1	N6/N3 ratio T3	WC (cm)	279	0.989	T3 GRS: β=0.04 [-6.28,6.37]	T1 GRS: Ref	Cross-sect	N. Rasaei, E. Daneshzad, A. Khadem, F. Gholami, M. Samadi and K. Mirzaei, Investigation of the interaction between genetic risk score (GRS) and fatty acid quality indices on metabolic syndrome among overweight and obese women, BMC Med Genomics, 2024, 17, 113.
GRS (3-SNP)	MC4R/CAV-1/Cry-1	N6/N3 ratio T3	WC (cm)	279	0.559	T2 GRS: β=1.89 [-4.46,8.25]	T1 GRS: Ref	Cross-sect	N. Rasaei, E. Daneshzad, A. Khadem, F. Gholami, M. Samadi and K. Mirzaei, Investigation of the interaction between genetic risk score (GRS) and fatty acid quality indices on metabolic syndrome among overweight and obese women, BMC Med Genomics, 2024, 17, 113.
IL10	rs1800896	Arachidonic acid (AA)	MetSyn	301	0.007	GG: β=-0.75 (95%CI: -1.21, -0.29)	GA+AA: β=-0.09 (95%CI: -0.32, 0.15)	Cross-sect	M. Maintinguer Norde, E. Oki, A. A. Ferreira Carioca, N. R. Teixeira Damasceno, R. M. Fisberg, D. M. Lobo Marchioni and M. M. Rogero, Influence of IL1B, IL6 and IL10 gene variants and plasma fatty acid interaction on metabolic syndrome risk in a cross-sectional population-based study, Clin Nutr, 2018, 37, 659-666.
IL10	rs1800896	D5D activity (estimated)	MetSyn	301	0.019	GG: β=-2.53 (95%CI: -4.83, -0.22)	GA+AA: β=0.39 (95%CI: -0.92, 1.69)	Cross-sect	M. Maintinguer Norde, E. Oki, A. A. Ferreira Carioca, N. R. Teixeira Damasceno, R. M. Fisberg, D. M. Lobo Marchioni and M. M. Rogero, Influence of IL1B, IL6 and IL10 gene variants and plasma fatty acid interaction on metabolic syndrome risk in a cross-sectional population-based study, Clin Nutr, 2018, 37, 659-666.
IL1B	rs1143634	DHA	MetSyn	301	0.05	TT: β=-0.74 (95%CI: -2.15, 0.67)	TC+CC: β=1.56 (95%CI: -0.60, 3.71)	Cross-sect	M. Maintinguer Norde, E. Oki, A. A. Ferreira Carioca, N. R. Teixeira Damasceno, R. M. Fisberg, D. M. Lobo Marchioni and M. M. Rogero, Influence of IL1B, IL6 and IL10 gene variants and plasma fatty acid interaction on metabolic syndrome risk in a cross-sectional population-based study, Clin Nutr, 2018, 37, 659-666.
IL1B	rs1143634	EPA	MetSyn	301	0.017	TT: β=-1.28 (95%CI: -2.29, -0.26)	TC+CC: β=0.45 (95%CI: -0.88, 1.77)	Cross-sect	M. Maintinguer Norde, E. Oki, A. A. Ferreira Carioca, N. R. Teixeira Damasceno, R. M. Fisberg, D. M. Lobo Marchioni and M. M. Rogero, Influence of IL1B, IL6 and IL10 gene variants and plasma fatty acid interaction on metabolic syndrome risk in a cross-sectional population-based study, Clin Nutr, 2018, 37, 659-666.
IL1RN	rs2637988	RBC DHA	TMT B	1620	0.000005	β interaction = -0.35	See Table 4 in Annevelink et al. 2024 for detailed effects by genotype	Cross-sect	C. E. Annevelink, J. Westra, A. Sala-Vila, W. S. Harris, N. L. Tintle and G. C. Shearer, A Genome-Wide Interaction Study of Erythrocyte omega-3 Polyunsaturated Fatty Acid Species and Memory in the Framingham Heart Study Offspring Cohort, J Nutr, 2024, 154, 1640-1651.
IL1RN	rs2637988	RBC DHA	TMT D	1620	2.9e-06	β interaction = -0.31	See Table 4 in Annevelink et al. 2024 for detailed effects by genotype	Cross-sect	C. E. Annevelink, J. Westra, A. Sala-Vila, W. S. Harris, N. L. Tintle and G. C. Shearer, A Genome-Wide Interaction Study of Erythrocyte omega-3 Polyunsaturated Fatty Acid Species and Memory in the Framingham Heart Study Offspring Cohort, J Nutr, 2024, 154, 1640-1651.
IL1RN	rs419598	RBC DHA	TMT D	1620	8.2e-06	β interaction = -0.29	See Table 4 in Annevelink et al. 2024 for detailed effects by genotype	Cross-sect	C. E. Annevelink, J. Westra, A. Sala-Vila, W. S. Harris, N. L. Tintle and G. C. Shearer, A Genome-Wide Interaction Study of Erythrocyte omega-3 Polyunsaturated Fatty Acid Species and Memory in the Framingham Heart Study Offspring Cohort, J Nutr, 2024, 154, 1640-1651.
IL6	rs1800795	ALA	Diastolic BP	665	0.0085	GG: -4.3 mmHg	CC: +2.8 mmHg	Cross-sect	R. P. Parajuli, J. M. Goodrich, H. M. Chan, M. Lemire, P. Ayotte, R. A. Hegele and N. Basu, Variation in biomarker levels of metals, persistent organic pollutants, and omega-3 fatty acids in association with genetic polymorphisms among Inuit in Nunavik, Canada, Environ Res, 2021, 200, 111393.
IL6	rs1800795	ALA	Systolic BP	665	0.0003	GG: -8.1 mmHg	CC: +5.2 mmHg	Cross-sect	R. P. Parajuli, J. M. Goodrich, H. M. Chan, M. Lemire, P. Ayotte, R. A. Hegele and N. Basu, Variation in biomarker levels of metals, persistent organic pollutants, and omega-3 fatty acids in association with genetic polymorphisms among Inuit in Nunavik, Canada, Environ Res, 2021, 200, 111393.
IL6	rs2961298	Erythrocyte DHA (% total fatty acids)	IL6 promoter cg01770232 methylation	848	0.05	AC heterozygotes: β = -0.05, P = 0.05	CC: β = -0.01, P = 0.41; AA: β = -0.08, P = 0.24	Cross-sect	Y. Ma, C. E. Smith, C. Q. Lai, M. R. Irvin, L. D. Parnell, Y. C. Lee, L. D. Pham, S. Aslibekyan, S. A. Claas, M. Y. Tsai, I. B. Borecki, E. K. Kabagambe, J. M. Ordovas, D. M. Absher and D. K. Arnett, The effects of omega-3 polyunsaturated fatty acids and genetic variants on methylation levels of the interleukin-6 gene promoter, Mol Nutr Food Res, 2016, 60, 410-419.
IL6	rs2961298	Erythrocyte EPA (% total fatty acids)	IL6 promoter cg01770232 methylation	848	0.01	AC heterozygotes: β = -0.18, P = 0.06	CC: β = 0.003, P = 0.66; AA: β = -0.36, P = 0.96	Cross-sect	Y. Ma, C. E. Smith, C. Q. Lai, M. R. Irvin, L. D. Parnell, Y. C. Lee, L. D. Pham, S. Aslibekyan, S. A. Claas, M. Y. Tsai, I. B. Borecki, E. K. Kabagambe, J. M. Ordovas, D. M. Absher and D. K. Arnett, The effects of omega-3 polyunsaturated fatty acids and genetic variants on methylation levels of the interleukin-6 gene promoter, Mol Nutr Food Res, 2016, 60, 410-419.
IL6	rs2961298 (A/C)	Erythrocyte total n-3 PUFA (% total fatty acids)	IL6 promoter cg01770232 methylation	848	0.02	AC heterozygotes: β = -0.04, P = 0.04	CC: β = -0.009, P = 0.67; AA: β = -0.08, P = 0.17	Cross-sect	Y. Ma, C. E. Smith, C. Q. Lai, M. R. Irvin, L. D. Parnell, Y. C. Lee, L. D. Pham, S. Aslibekyan, S. A. Claas, M. Y. Tsai, I. B. Borecki, E. K. Kabagambe, J. M. Ordovas, D. M. Absher and D. K. Arnett, The effects of omega-3 polyunsaturated fatty acids and genetic variants on methylation levels of the interleukin-6 gene promoter, Mol Nutr Food Res, 2016, 60, 410-419.
IL6	rs1800795	LA	Systolic BP	665	0.0188	GG: -4.5 mmHg	CC: +2.3 mmHg	Cross-sect	R. P. Parajuli, J. M. Goodrich, H. M. Chan, M. Lemire, P. Ayotte, R. A. Hegele and N. Basu, Variation in biomarker levels of metals, persistent organic pollutants, and omega-3 fatty acids in association with genetic polymorphisms among Inuit in Nunavik, Canada, Environ Res, 2021, 200, 111393.
IRS2	rs2289046	Plasma n-3 PUFA	Fasting insulin	452	<0.018	Low n-3 PUFA (≤3.68%): A/A had lower fasting insulin (~10.5 vs ~11 mU/L)	High n-3 PUFA (>3.68%): A/A had HIGHER fasting insulin (~11.5 vs ~9 mU/L, P<0.05). A/G+G/G carriers with high n-3 PUFA had better insulin sensitivity	Cross-sect MetS (LIPGENE)	P. Perez-Martinez, J. Delgado-Lista, A. Garcia-Rios, A. C. Tierney, H. L. Gulseth, C. M. Williams, B. Karlstrom, B. Kiec-Wilk, E. E. Blaak, O. Helal, W. H. M. Saris, C. Defoort, C. A. Drevon, J. A. Lovegrove, A. Dembinska-Kiec, U. Riserus, H. M. Roche and J. Lopez-Miranda, Insulin receptor substrate-2 gene variants in subjects with metabolic syndrome: association with plasma monounsaturated and n…
IRS2	rs2289046	Plasma n-3 PUFA	HOMA-IR	452	<0.021	Low n-3 PUFA (≤3.68%): A/A had lower HOMA-IR (~2.6 vs ~2.8)	High n-3 PUFA (>3.68%): A/A had HIGHER HOMA-IR (~3.0 vs ~2.3, P<0.05, worse insulin resistance). A/G+G/G carriers with high n-3 PUFA had better insulin sensitivity	Cross-sect MetS (LIPGENE)	P. Perez-Martinez, J. Delgado-Lista, A. Garcia-Rios, A. C. Tierney, H. L. Gulseth, C. M. Williams, B. Karlstrom, B. Kiec-Wilk, E. E. Blaak, O. Helal, W. H. M. Saris, C. Defoort, C. A. Drevon, J. A. Lovegrove, A. Dembinska-Kiec, U. Riserus, H. M. Roche and J. Lopez-Miranda, Insulin receptor substrate-2 gene variants in subjects with metabolic syndrome: association with plasma monounsaturated and n…
Intergenic	rs878953	n-3 (δ¹⁵N)	Thigh skinfold	982	0.217	No significant interaction	Main effect P=0.0004	Cross-sect	L. K. Vaughan, H. W. Wiener, S. Aslibekyan, D. B. Allison, P. J. Havel, K. L. Stanhope, D. M. O'Brien, S. E. Hopkins, D. J. Lemas, B. B. Boyer and H. K. Tiwari, Linkage and association analysis of obesity traits reveals novel loci and interactions with dietary n-3 fatty acids in an Alaska Native (Yup'ik) population, Metabolism, 2015, 64, 689-697.
LDLR	rs688	n-6 PUFA diet	TG change	79	0.034	CC: +0.01±0.16 mmol/L (n=20) \	CT+TT: -0.25±0.06 (n=59)	RCT crossover 4wk	E. Rajendiran, B. Lamarche, Y. She, V. Ramprasath, P. Eck, D. Brassard, I. Gigleux, E. Levy, A. Tremblay, P. Couture, J. D. House, P. J. H. Jones and C. Desmarchelier, A combination of single nucleotide polymorphisms is associated with the interindividual variability in the blood lipid response to dietary fatty acid consumption in a randomized clinical trial, Am J Clin Nutr, 2021, 114, 564-577.
LOC105373456	rs16985416	RBC DHA	TMT A	1620	9.4e-06	β interaction = -0.1	See Table 4 in Annevelink et al. 2024 for detailed effects by genotype	Cross-sect	C. E. Annevelink, J. Westra, A. Sala-Vila, W. S. Harris, N. L. Tintle and G. C. Shearer, A Genome-Wide Interaction Study of Erythrocyte omega-3 Polyunsaturated Fatty Acid Species and Memory in the Framingham Heart Study Offspring Cohort, J Nutr, 2024, 154, 1640-1651.
LOC105373456	rs16985416	RBC Omega-3 Index (EPA+DHA)	TMT A	1620	8.4e-06	β interaction = -0.1	See Table 4 in Annevelink et al. 2024 for detailed effects by genotype	Cross-sect	C. E. Annevelink, J. Westra, A. Sala-Vila, W. S. Harris, N. L. Tintle and G. C. Shearer, A Genome-Wide Interaction Study of Erythrocyte omega-3 Polyunsaturated Fatty Acid Species and Memory in the Framingham Heart Study Offspring Cohort, J Nutr, 2024, 154, 1640-1651.
LOC105375855	rs6471623	RBC DHA	TMT A	1620	6.9e-06	β interaction = 0.14	See Table 4 in Annevelink et al. 2024 for detailed effects by genotype	Cross-sect	C. E. Annevelink, J. Westra, A. Sala-Vila, W. S. Harris, N. L. Tintle and G. C. Shearer, A Genome-Wide Interaction Study of Erythrocyte omega-3 Polyunsaturated Fatty Acid Species and Memory in the Framingham Heart Study Offspring Cohort, J Nutr, 2024, 154, 1640-1651.
LOC643339	rs11106868	RBC ALA	TMT B	1620	8.6e-06	β interaction = 0.3	See Table 4 in Annevelink et al. 2024 for detailed effects by genotype	Cross-sect	C. E. Annevelink, J. Westra, A. Sala-Vila, W. S. Harris, N. L. Tintle and G. C. Shearer, A Genome-Wide Interaction Study of Erythrocyte omega-3 Polyunsaturated Fatty Acid Species and Memory in the Framingham Heart Study Offspring Cohort, J Nutr, 2024, 154, 1640-1651.
LOC730100	rs6727517	RBC DHA	TMT A	1620	5.8e-06	β interaction = -0.1	See Table 4 in Annevelink et al. 2024 for detailed effects by genotype	Cross-sect	C. E. Annevelink, J. Westra, A. Sala-Vila, W. S. Harris, N. L. Tintle and G. C. Shearer, A Genome-Wide Interaction Study of Erythrocyte omega-3 Polyunsaturated Fatty Acid Species and Memory in the Framingham Heart Study Offspring Cohort, J Nutr, 2024, 154, 1640-1651.
LOC730100	rs6727517	RBC Omega-3 Index (EPA+DHA)	TMT A	1620	7.7e-06	β interaction = -0.1	See Table 4 in Annevelink et al. 2024 for detailed effects by genotype	Cross-sect	C. E. Annevelink, J. Westra, A. Sala-Vila, W. S. Harris, N. L. Tintle and G. C. Shearer, A Genome-Wide Interaction Study of Erythrocyte omega-3 Polyunsaturated Fatty Acid Species and Memory in the Framingham Heart Study Offspring Cohort, J Nutr, 2024, 154, 1640-1651.
LPL	rs320	Total PUFA	BMI	1171	0.002	CC: β=-0.34 (women)	TT: NS	Cross-sect	Y. Ma, K. L. Tucker, C. E. Smith, Y. C. Lee, T. Huang, K. Richardson, L. D. Parnell, C. Q. Lai, K. L. Young, A. E. Justice, Y. Shao, K. E. North and J. M. Ordovas, Lipoprotein lipase variants interact with polyunsaturated fatty acids for obesity traits in women: replication in two populations, Nutr Metab Cardiovasc Dis, 2014, 24, 1323-1329.
LPL	rs320	Total PUFA	Waist (meta)	1171	4×10⁻⁵	CC: Beneficial	TT: No effect	Meta-anal	Y. Ma, K. L. Tucker, C. E. Smith, Y. C. Lee, T. Huang, K. Richardson, L. D. Parnell, C. Q. Lai, K. L. Young, A. E. Justice, Y. Shao, K. E. North and J. M. Ordovas, Lipoprotein lipase variants interact with polyunsaturated fatty acids for obesity traits in women: replication in two populations, Nutr Metab Cardiovasc Dis, 2014, 24, 1323-1329.
LPL	rs320	Total PUFA	Waist circ	1171	0.001	CC: β=-1.48 cm (W)	TT: NS	Cross-sect	Y. Ma, K. L. Tucker, C. E. Smith, Y. C. Lee, T. Huang, K. Richardson, L. D. Parnell, C. Q. Lai, K. L. Young, A. E. Justice, Y. Shao, K. E. North and J. M. Ordovas, Lipoprotein lipase variants interact with polyunsaturated fatty acids for obesity traits in women: replication in two populations, Nutr Metab Cardiovasc Dis, 2014, 24, 1323-1329.
LUZP2	rs1596854	n-3 (δ¹⁵N)	Waist circumference	982	0.217	No significant interaction	Main effect P=0.0003	Cross-sect	L. K. Vaughan, H. W. Wiener, S. Aslibekyan, D. B. Allison, P. J. Havel, K. L. Stanhope, D. M. O'Brien, S. E. Hopkins, D. J. Lemas, B. B. Boyer and H. K. Tiwari, Linkage and association analysis of obesity traits reveals novel loci and interactions with dietary n-3 fatty acids in an Alaska Native (Yup'ik) population, Metabolism, 2015, 64, 689-697.
MDH1B	rs2359724	RBC ALA	TMT A	1620	7.6e-06	β interaction = -0.13	See Table 4 in Annevelink et al. 2024 for detailed effects by genotype	Cross-sect	C. E. Annevelink, J. Westra, A. Sala-Vila, W. S. Harris, N. L. Tintle and G. C. Shearer, A Genome-Wide Interaction Study of Erythrocyte omega-3 Polyunsaturated Fatty Acid Species and Memory in the Framingham Heart Study Offspring Cohort, J Nutr, 2024, 154, 1640-1651.
MIR548XHG	rs9974998	RBC ALA	TMT B	1620	8.9e-06	β interaction = 0.25	See Table 4 in Annevelink et al. 2024 for detailed effects by genotype	Cross-sect	C. E. Annevelink, J. Westra, A. Sala-Vila, W. S. Harris, N. L. Tintle and G. C. Shearer, A Genome-Wide Interaction Study of Erythrocyte omega-3 Polyunsaturated Fatty Acid Species and Memory in the Framingham Heart Study Offspring Cohort, J Nutr, 2024, 154, 1640-1651.
MIR548XHG	rs9974998	RBC ALA	TMT D	1620	8.3e-06	β interaction = 0.23	See Table 4 in Annevelink et al. 2024 for detailed effects by genotype	Cross-sect	C. E. Annevelink, J. Westra, A. Sala-Vila, W. S. Harris, N. L. Tintle and G. C. Shearer, A Genome-Wide Interaction Study of Erythrocyte omega-3 Polyunsaturated Fatty Acid Species and Memory in the Framingham Heart Study Offspring Cohort, J Nutr, 2024, 154, 1640-1651.
MLXIPL	rs3812316	ALA (α-linolenic acid)	Triglycerides	415	<0.001	CC+insufficient ALA: 2.11±0.01 log mg/dL	CG+GG+insufficient ALA: 1.97±0.03 log mg/dL	Cross-sect	M. Maldonado-Gonzalez, Z. H. Hernandez-Nazara, N. Torres-Castillo, E. Martinez-Lopez, L. de la Cruz-Color and B. Ruiz-Madrigal, Association between the rs3812316 Single Nucleotide Variant of the MLXIPL Gene and Alpha-Linolenic Acid Intake with Triglycerides in Mexican Mestizo Women, Nutrients, 2022, 14.
MTHFR	1298A>C (rs1801131)	(n-3) PUFA (% energy)	Plasma Hcy	995	0.67	No interaction	Tested but NS	Cross-sect	T. Huang, K. L. Tucker, Y. C. Lee, J. W. Crott, L. D. Parnell, J. Shen, C. E. Smith, J. M. Ordovas, D. Li and C. Q. Lai, Methylenetetrahydrofolate reductase variants associated with hypertension and cardiovascular disease interact with dietary polyunsaturated fatty acids to modulate plasma homocysteine in puerto rican adults, J Nutr, 2011, 141, 654-659.
MTHFR	677TT+1298AC/CC	(n-3) PUFA (% energy)	Plasma Hcy	995	0.024	Combined risk genotypes: High (n-3) PUFA (>0.66%) had LOWER Hcy vs low (n-3) PUFA (≤0.66%)	Combined genotype analysis shows protective effect of n-3	Cross-sect	T. Huang, K. L. Tucker, Y. C. Lee, J. W. Crott, L. D. Parnell, J. Shen, C. E. Smith, J. M. Ordovas, D. Li and C. Q. Lai, Methylenetetrahydrofolate reductase variants associated with hypertension and cardiovascular disease interact with dietary polyunsaturated fatty acids to modulate plasma homocysteine in puerto rican adults, J Nutr, 2011, 141, 654-659.
MTHFR	677C>T (rs1801133)	(n-3) PUFA (% energy)	Plasma Hcy	995	0.76	No interaction	Tested but NS	Cross-sect	T. Huang, K. L. Tucker, Y. C. Lee, J. W. Crott, L. D. Parnell, J. Shen, C. E. Smith, J. M. Ordovas, D. Li and C. Q. Lai, Methylenetetrahydrofolate reductase variants associated with hypertension and cardiovascular disease interact with dietary polyunsaturated fatty acids to modulate plasma homocysteine in puerto rican adults, J Nutr, 2011, 141, 654-659.
MTHFR	677C>T (rs1801133)	Total PUFA (% energy)	Plasma Hcy	995	0.48	No interaction	Tested but NS	Cross-sect	T. Huang, K. L. Tucker, Y. C. Lee, J. W. Crott, L. D. Parnell, J. Shen, C. E. Smith, J. M. Ordovas, D. Li and C. Q. Lai, Methylenetetrahydrofolate reductase variants associated with hypertension and cardiovascular disease interact with dietary polyunsaturated fatty acids to modulate plasma homocysteine in puerto rican adults, J Nutr, 2011, 141, 654-659.
MTTP	rs2306986	n-6 PUFA diet	TG change	79	<0.001	GG: -0.09±0.05 mmol/L (n=67) \	CG: -0.61±0.13 (n=12)	RCT crossover 4wk	E. Rajendiran, B. Lamarche, Y. She, V. Ramprasath, P. Eck, D. Brassard, I. Gigleux, E. Levy, A. Tremblay, P. Couture, J. D. House, P. J. H. Jones and C. Desmarchelier, A combination of single nucleotide polymorphisms is associated with the interindividual variability in the blood lipid response to dietary fatty acid consumption in a randomized clinical trial, Am J Clin Nutr, 2021, 114, 564-577.
MUC19	rs17589334	RBC ALA	TMT D	1620	7.5e-06	β interaction = 0.32	See Table 4 in Annevelink et al. 2024 for detailed effects by genotype	Cross-sect	C. E. Annevelink, J. Westra, A. Sala-Vila, W. S. Harris, N. L. Tintle and G. C. Shearer, A Genome-Wide Interaction Study of Erythrocyte omega-3 Polyunsaturated Fatty Acid Species and Memory in the Framingham Heart Study Offspring Cohort, J Nutr, 2024, 154, 1640-1651.
MXRA7	rs11077856	RBC DHA	TMT A	1620	9.4e-06	β interaction = -0.1	See Table 4 in Annevelink et al. 2024 for detailed effects by genotype	Cross-sect	C. E. Annevelink, J. Westra, A. Sala-Vila, W. S. Harris, N. L. Tintle and G. C. Shearer, A Genome-Wide Interaction Study of Erythrocyte omega-3 Polyunsaturated Fatty Acid Species and Memory in the Framingham Heart Study Offspring Cohort, J Nutr, 2024, 154, 1640-1651.
MXRA7	rs11077856	RBC Omega-3 Index (EPA+DHA)	TMT A	1620	3.9e-06	β interaction = -0.1	See Table 4 in Annevelink et al. 2024 for detailed effects by genotype	Cross-sect	C. E. Annevelink, J. Westra, A. Sala-Vila, W. S. Harris, N. L. Tintle and G. C. Shearer, A Genome-Wide Interaction Study of Erythrocyte omega-3 Polyunsaturated Fatty Acid Species and Memory in the Framingham Heart Study Offspring Cohort, J Nutr, 2024, 154, 1640-1651.
MXRA7	rs11659537	RBC Omega-3 Index (EPA+DHA)	TMT A	1620	7.9e-06	β interaction = -0.1	See Table 4 in Annevelink et al. 2024 for detailed effects by genotype	Cross-sect	C. E. Annevelink, J. Westra, A. Sala-Vila, W. S. Harris, N. L. Tintle and G. C. Shearer, A Genome-Wide Interaction Study of Erythrocyte omega-3 Polyunsaturated Fatty Acid Species and Memory in the Framingham Heart Study Offspring Cohort, J Nutr, 2024, 154, 1640-1651.
NOS3	rs1799983	EPA+DHA 2g/d	TC Δ	150	0.293	No interaction	No interaction	RCT 6mo	J. S. Zheng, Corrigendum to "Replication of a gene-diet interaction at CD36, NOS3 and PPARG in response to omega-3 fatty acid supplements on blood lipids: A double-blind randomized controlled trial" (EBioMedicine May 2018;31:150-156), EBioMedicine, 2019, 40, 751-752.; J. S. Zheng, J. Chen, L. Wang, H. Yang, L. Fang, Y. Yu, L. Yuan, J. Feng, K. Li, J. Tang, M. Lin, C. Q. Lai and D. Li, Replication…
NOS3	rs1799983	EPA+DHA 2g/d	TG Δ	150	0.022	GG: -0.38 mmol/L	TT: +0.11 mmol/L	RCT 6mo	J. S. Zheng, Corrigendum to "Replication of a gene-diet interaction at CD36, NOS3 and PPARG in response to omega-3 fatty acid supplements on blood lipids: A double-blind randomized controlled trial" (EBioMedicine May 2018;31:150-156), EBioMedicine, 2019, 40, 751-752.; J. S. Zheng, J. Chen, L. Wang, H. Yang, L. Fang, Y. Yu, L. Yuan, J. Feng, K. Li, J. Tang, M. Lin, C. Q. Lai and D. Li, Replication…
NOS3	rs1799983	EPA+DHA 2g/d×ω3	TC Δ	150	0.031	GG+high ω3Δ: -0.47	TT+low ω3Δ: +0.05	RCT 6mo	J. S. Zheng, Corrigendum to "Replication of a gene-diet interaction at CD36, NOS3 and PPARG in response to omega-3 fatty acid supplements on blood lipids: A double-blind randomized controlled trial" (EBioMedicine May 2018;31:150-156), EBioMedicine, 2019, 40, 751-752.; J. S. Zheng, J. Chen, L. Wang, H. Yang, L. Fang, Y. Yu, L. Yuan, J. Feng, K. Li, J. Tang, M. Lin, C. Q. Lai and D. Li, Replication…
NPC1L1	rs2073547	n-6 PUFA diet	TG change	79	0.016	AA: -0.06±0.07 mmol/L (n=43) \	AG+GG: -0.33±0.07 (n=36)	RCT crossover 4wk	E. Rajendiran, B. Lamarche, Y. She, V. Ramprasath, P. Eck, D. Brassard, I. Gigleux, E. Levy, A. Tremblay, P. Couture, J. D. House, P. J. H. Jones and C. Desmarchelier, A combination of single nucleotide polymorphisms is associated with the interindividual variability in the blood lipid response to dietary fatty acid consumption in a randomized clinical trial, Am J Clin Nutr, 2021, 114, 564-577.
OSBPL3	rs10215692	RBC DHA	TMT A	1620	7.3e-06	β interaction = -0.16	See Table 4 in Annevelink et al. 2024 for detailed effects by genotype	Cross-sect	C. E. Annevelink, J. Westra, A. Sala-Vila, W. S. Harris, N. L. Tintle and G. C. Shearer, A Genome-Wide Interaction Study of Erythrocyte omega-3 Polyunsaturated Fatty Acid Species and Memory in the Framingham Heart Study Offspring Cohort, J Nutr, 2024, 154, 1640-1651.
OSBPL3	rs10215692	RBC Omega-3 Index (EPA+DHA)	TMT A	1620	6.9e-06	β interaction = -0.16	See Table 4 in Annevelink et al. 2024 for detailed effects by genotype	Cross-sect	C. E. Annevelink, J. Westra, A. Sala-Vila, W. S. Harris, N. L. Tintle and G. C. Shearer, A Genome-Wide Interaction Study of Erythrocyte omega-3 Polyunsaturated Fatty Acid Species and Memory in the Framingham Heart Study Offspring Cohort, J Nutr, 2024, 154, 1640-1651.
PLA2G2A	rs4654990	Erythrocyte DHA	Sudden cardiac arrest	1869	0.003	G allele: Exp coef 0.905 (95% CI 0.85, 0.97) per 1% DHA	For G-allele carriers, OR for SCA per 1% higher DHA is 0.905× that of non-carriers; NS after Bonferroni (threshold P=0.00026)	Case-only	R. N. Lemaitre, T. M. Bartz, I. B. King, J. A. Brody, B. McKnight, N. Sotoodehnia, T. D. Rea, C. O. Johnson, D. Mozaffarian, S. Hesselson, P. Y. Kwok and D. S. Siscovick, Circulating n-3 fatty acids and trans-fatty acids, PLA2G2A gene variation and sudden cardiac arrest, J Nutr Sci, 2016, 5, e12.
PLA2G2A	rs4654990	Erythrocyte EPA	Sudden cardiac arrest	1869	0.013	G allele: Exp coef 0.981 (SE 0.008) per 1% EPA	For G-allele carriers, OR for SCA per 1% higher EPA is 0.981× that of non-carriers; NS after Bonferroni	Case-only	R. N. Lemaitre, T. M. Bartz, I. B. King, J. A. Brody, B. McKnight, N. Sotoodehnia, T. D. Rea, C. O. Johnson, D. Mozaffarian, S. Hesselson, P. Y. Kwok and D. S. Siscovick, Circulating n-3 fatty acids and trans-fatty acids, PLA2G2A gene variation and sudden cardiac arrest, J Nutr Sci, 2016, 5, e12.
PLA2G2C	rs2301475	n-3 PUFA 3g/d (1.9g EPA+1.1g DHA)	Plasma TG (mmol/L)	208	0.8703	Post-supp TG: A/A ~1.0 mmol/L (n=180), A/G ~1.0 mmol/L (n=75), G/G ~1.5 mmol/L (n=35); P=0.03, P=0.01	No gene×supplementation interaction; significant genotype main effect (P=0.021) with G/G showing higher TG post-supplementation, but NS after adjusting for baseline TG	Single-arm intervention	B. L. Tremblay, H. Cormier, I. Rudkowska, S. Lemieux, P. Couture and M. C. Vohl, Association between polymorphisms in phospholipase A2 genes and the plasma triglyceride response to an n-3 PUFA supplementation: a clinical trial, Lipids Health Dis, 2015, 14, 12.
PLA2G2F	rs818571	n-3 PUFA 3g/d (1.9g EPA+1.1g DHA)	Plasma TG (mmol/L)	208	0.3958	Significant genotype main effect (P=0.019)	No gene×supplementation interaction; genotype independently affects TG levels	Single-arm intervention	B. L. Tremblay, H. Cormier, I. Rudkowska, S. Lemieux, P. Couture and M. C. Vohl, Association between polymorphisms in phospholipase A2 genes and the plasma triglyceride response to an n-3 PUFA supplementation: a clinical trial, Lipids Health Dis, 2015, 14, 12.
PLA2G4A	rs3736741	EPA 1.9-2.2g + DHA 1.1g/d	Plasma CRP (mg/L)	191	Men: NS; Women: 0.0340	AA: 2.31→2.24 (β=0.06±0.05); AG: 2.59→2.55 (β=0.01±0.05); GG: 0.86→2.55 (β=0.31±0.13)	Genotype P=0.5779	Single-arm intervention	B. L. Tremblay, I. Rudkowska, P. Couture, S. Lemieux, P. Julien and M. C. Vohl, Modulation of C-reactive protein and plasma omega-6 fatty acid levels by phospholipase A2 gene polymorphisms following a 6-week supplementation with fish oil, Prostaglandins Leukot Essent Fatty Acids, 2015, 102-103, 37-45.
PLA2G4A	rs10157410	EPA 1.9-2.2g + DHA 1.1g/d	Plasma CRP (mg/L)	191	Men: 0.0003; Women: NS	GG: 1.27→1.12 (β=0.07±0.04); CC+CG: 1.01→1.67 (β=0.26±0.08)	Genotype P=0.8622; explained 13.08% Δ CRP variance	Single-arm intervention	B. L. Tremblay, I. Rudkowska, P. Couture, S. Lemieux, P. Julien and M. C. Vohl, Modulation of C-reactive protein and plasma omega-6 fatty acid levels by phospholipase A2 gene polymorphisms following a 6-week supplementation with fish oil, Prostaglandins Leukot Essent Fatty Acids, 2015, 102-103, 37-45.
PLA2G4A	rs1160719	EPA 1.9-2.2g + DHA 1.1g/d	Plasma CRP (mg/L)	191	Men: NS; Women: 0.0143	GG: 2.45→2.76 (β=0.05±0.04); AA+AG: 2.10→1.63 (β=0.12±0.06)	Genotype P=0.2437; explained 6.32% Δ CRP variance	Single-arm intervention	B. L. Tremblay, I. Rudkowska, P. Couture, S. Lemieux, P. Julien and M. C. Vohl, Modulation of C-reactive protein and plasma omega-6 fatty acid levels by phospholipase A2 gene polymorphisms following a 6-week supplementation with fish oil, Prostaglandins Leukot Essent Fatty Acids, 2015, 102-103, 37-45.
PLA2G4A	rs12720702	EPA 1.9-2.2g + DHA 1.1g/d	Plasma CRP (mg/L)	191	Men: NS; Women: 0.0454	AA: 2.36→2.59 (β=0.02±0.04); AG+GG: 2.05→1.08 (β=0.18±0.09)	Genotype P=0.4404	Single-arm intervention	B. L. Tremblay, I. Rudkowska, P. Couture, S. Lemieux, P. Julien and M. C. Vohl, Modulation of C-reactive protein and plasma omega-6 fatty acid levels by phospholipase A2 gene polymorphisms following a 6-week supplementation with fish oil, Prostaglandins Leukot Essent Fatty Acids, 2015, 102-103, 37-45.
PLA2G4A	rs12720497	EPA 1.9-2.2g + DHA 1.1g/d	Total n-6 FA (% in PL)	191	Men: NS; Women: 0.0157	CC: 35.05→30.06% (β=4.99±0.39); CT: 34.78→29.50% (β=5.28±0.34); TT: 34.72→31.35% (β=3.36±0.56)	Genotype P=0.2520	Single-arm intervention	B. L. Tremblay, I. Rudkowska, P. Couture, S. Lemieux, P. Julien and M. C. Vohl, Modulation of C-reactive protein and plasma omega-6 fatty acid levels by phospholipase A2 gene polymorphisms following a 6-week supplementation with fish oil, Prostaglandins Leukot Essent Fatty Acids, 2015, 102-103, 37-45.
PLA2G4A	rs10911935	EPA 1.9-2.2g + DHA 1.1g/d	Total n-6 FA (% in PL)	191	Men: 0.0375; Women: NS	GG: 35.10→30.08% (β=5.01±0.29); GT+TT: 35.74→31.72% (β=4.02±0.37)	Genotype P=0.0028	Single-arm intervention	B. L. Tremblay, I. Rudkowska, P. Couture, S. Lemieux, P. Julien and M. C. Vohl, Modulation of C-reactive protein and plasma omega-6 fatty acid levels by phospholipase A2 gene polymorphisms following a 6-week supplementation with fish oil, Prostaglandins Leukot Essent Fatty Acids, 2015, 102-103, 37-45.
PLA2G4A	rs10752979	EPA 1.9-2.2g + DHA 1.1g/d	Total n-6 FA (% in PL)	191	Men: NS; Women: 0.0274	GG: 34.87→30.37% (β=4.50±0.28); AA+AG: 34.84→29.17% (β=5.68±0.44)	Genotype P=0.1296	Single-arm intervention	B. L. Tremblay, I. Rudkowska, P. Couture, S. Lemieux, P. Julien and M. C. Vohl, Modulation of C-reactive protein and plasma omega-6 fatty acid levels by phospholipase A2 gene polymorphisms following a 6-week supplementation with fish oil, Prostaglandins Leukot Essent Fatty Acids, 2015, 102-103, 37-45.
PLA2G4A	rs3820185	EPA 1.9-2.2g + DHA 1.1g/d	Total n-6 FA (% in PL)	191	Men: 0.2095; Women: NS	GG: 35.14→30.07% (β=5.07±0.33); GT: 35.34→31.10% (β=4.24±0.34); TT: 37.04→32.76% (β=4.27±1.01)	Genotype P=0.0184	Single-arm intervention	B. L. Tremblay, I. Rudkowska, P. Couture, S. Lemieux, P. Julien and M. C. Vohl, Modulation of C-reactive protein and plasma omega-6 fatty acid levels by phospholipase A2 gene polymorphisms following a 6-week supplementation with fish oil, Prostaglandins Leukot Essent Fatty Acids, 2015, 102-103, 37-45.
PLA2G4A	rs11587539	EPA 1.9-2.2g + DHA 1.1g/d	Total n-6 FA (% in PL)	191	Men: 0.0884; Women: NS	AA: 35.45→30.78% (β=4.67±0.40); AT: 35.50→31.24% (β=4.25±0.33); TT: 34.67→29.01% (β=5.67±0.54)	Genotype P=0.0129	Single-arm intervention	B. L. Tremblay, I. Rudkowska, P. Couture, S. Lemieux, P. Julien and M. C. Vohl, Modulation of C-reactive protein and plasma omega-6 fatty acid levels by phospholipase A2 gene polymorphisms following a 6-week supplementation with fish oil, Prostaglandins Leukot Essent Fatty Acids, 2015, 102-103, 37-45.
PLA2G4A	rs979924	EPA 1.9-2.2g + DHA 1.1g/d	Total n-6 FA (% in PL)	191	Men: NS; Women: 0.0203	CT: 35.30→29.12% (β=6.20±0.63); TT: 34.78→30.18% (β=4.61±0.26)	Genotype P=0.2395	Single-arm intervention	B. L. Tremblay, I. Rudkowska, P. Couture, S. Lemieux, P. Julien and M. C. Vohl, Modulation of C-reactive protein and plasma omega-6 fatty acid levels by phospholipase A2 gene polymorphisms following a 6-week supplementation with fish oil, Prostaglandins Leukot Essent Fatty Acids, 2015, 102-103, 37-45.
PLA2G4A	rs10737277	n-3 PUFA 3g/d (1.9g EPA+1.1g DHA)	Plasma TG (mmol/L)	208	0.0241	Significant genotype × supplementation interaction	TG response differs by genotype; genotype main effect NS (P=0.67)	Single-arm intervention	B. L. Tremblay, H. Cormier, I. Rudkowska, S. Lemieux, P. Couture and M. C. Vohl, Association between polymorphisms in phospholipase A2 genes and the plasma triglyceride response to an n-3 PUFA supplementation: a clinical trial, Lipids Health Dis, 2015, 14, 12.
PLA2G4A	rs10752979	n-3 PUFA 3g/d (1.9g EPA+1.1g DHA)	Plasma TG (mmol/L)	208	0.0273	Significant genotype × supplementation interaction	TG response differs by genotype; genotype main effect NS (P=0.92)	Single-arm intervention	B. L. Tremblay, H. Cormier, I. Rudkowska, S. Lemieux, P. Couture and M. C. Vohl, Association between polymorphisms in phospholipase A2 genes and the plasma triglyceride response to an n-3 PUFA supplementation: a clinical trial, Lipids Health Dis, 2015, 14, 12.
PLA2G4A	rs1569480	n-3 PUFA 3g/d (1.9g EPA+1.1g DHA)	Plasma TG (mmol/L)	208	0.7758	Post-supp TG: A/A ~1.1 mmol/L (n=63), A/G ~1.0 mmol/L (n=104), G/G ~0.8 mmol/L (n=39); P=0.01, P=0.007	No gene×supplementation interaction; significant genotype main effect (P=0.020) with G/G showing lower TG post-supplementation, but NS after adjusting for baseline TG	Single-arm intervention	B. L. Tremblay, H. Cormier, I. Rudkowska, S. Lemieux, P. Couture and M. C. Vohl, Association between polymorphisms in phospholipase A2 genes and the plasma triglyceride response to an n-3 PUFA supplementation: a clinical trial, Lipids Health Dis, 2015, 14, 12.
PLA2G4A	rs7540602	n-3 PUFA 3g/d (1.9g EPA+1.1g DHA)	Plasma TG (mmol/L)	208	0.0344	Significant genotype × supplementation interaction	TG response differs by genotype; genotype main effect NS (P=0.17)	Single-arm intervention	B. L. Tremblay, H. Cormier, I. Rudkowska, S. Lemieux, P. Couture and M. C. Vohl, Association between polymorphisms in phospholipase A2 genes and the plasma triglyceride response to an n-3 PUFA supplementation: a clinical trial, Lipids Health Dis, 2015, 14, 12.
PLA2G4A	rs3820185	n-3 PUFA 3g/d (1.9g EPA+1.1g DHA)	Plasma TG (mmol/L)	208	0.0231	Significant genotype × supplementation interaction	TG response differs by genotype; genotype main effect NS (P=0.48)	Single-arm intervention	B. L. Tremblay, H. Cormier, I. Rudkowska, S. Lemieux, P. Couture and M. C. Vohl, Association between polymorphisms in phospholipase A2 genes and the plasma triglyceride response to an n-3 PUFA supplementation: a clinical trial, Lipids Health Dis, 2015, 14, 12.
PLA2G6	rs133016	EPA 1.9-2.2g + DHA 1.1g/d	Plasma CRP (mg/L)	191	0.1080	AA: 1.85→2.06 (β=0.16±0.09); AG: 0.79→0.84 (β=0.06±0.05); GG: 1.53→1.44 (β=0.02±0.07)	Genotype P=0.0223	Single-arm intervention	B. L. Tremblay, I. Rudkowska, P. Couture, S. Lemieux, P. Julien and M. C. Vohl, Modulation of C-reactive protein and plasma omega-6 fatty acid levels by phospholipase A2 gene polymorphisms following a 6-week supplementation with fish oil, Prostaglandins Leukot Essent Fatty Acids, 2015, 102-103, 37-45.
PLA2G6	rs2284060	EPA 1.9-2.2g + DHA 1.1g/d	Plasma CRP (mg/L)	191	0.0272	AA: 1.36→1.23 (β=0.05±0.07); AG: 0.93→1.32 (β=0.10±0.05); GG: 1.75→1.05 (β=0.17±0.09)	Genotype P=0.3658	Single-arm intervention	B. L. Tremblay, I. Rudkowska, P. Couture, S. Lemieux, P. Julien and M. C. Vohl, Modulation of C-reactive protein and plasma omega-6 fatty acid levels by phospholipase A2 gene polymorphisms following a 6-week supplementation with fish oil, Prostaglandins Leukot Essent Fatty Acids, 2015, 102-103, 37-45.
PLA2G6	rs2235346	EPA 1.9-2.2g + DHA 1.1g/d	Total n-6 FA (% in PL)	191	0.0945	AA: 34.90→29.37% (β=5.54±0.47); AC: 35.25→30.92% (β=4.32±0.32); CC: 35.89→31.47% (β=4.42±0.45)	Genotype P=0.0091	Single-arm intervention	B. L. Tremblay, I. Rudkowska, P. Couture, S. Lemieux, P. Julien and M. C. Vohl, Modulation of C-reactive protein and plasma omega-6 fatty acid levels by phospholipase A2 gene polymorphisms following a 6-week supplementation with fish oil, Prostaglandins Leukot Essent Fatty Acids, 2015, 102-103, 37-45.
PLA2G6	rs2284060	EPA 1.9-2.2g + DHA 1.1g/d	Total n-6 FA (% in PL)	191	0.0445	AA: 35.76→31.91% (β=3.85±0.40); AG: 35.15→30.28% (β=4.87±0.32); GG: 35.06→29.64% (β=5.41±0.54)	Genotype P=0.0040	Single-arm intervention	B. L. Tremblay, I. Rudkowska, P. Couture, S. Lemieux, P. Julien and M. C. Vohl, Modulation of C-reactive protein and plasma omega-6 fatty acid levels by phospholipase A2 gene polymorphisms following a 6-week supplementation with fish oil, Prostaglandins Leukot Essent Fatty Acids, 2015, 102-103, 37-45.
PLA2G7	rs1805018 (I198T)	n-3 PUFA 3g/d (1.9g EPA+1.1g DHA)	Plasma TG (mmol/L)	208	0.0286	Significant genotype × supplementation interaction	TG response differs by genotype; genotype main effect NS (P=0.24)	Single-arm intervention	B. L. Tremblay, H. Cormier, I. Rudkowska, S. Lemieux, P. Couture and M. C. Vohl, Association between polymorphisms in phospholipase A2 genes and the plasma triglyceride response to an n-3 PUFA supplementation: a clinical trial, Lipids Health Dis, 2015, 14, 12.
PNPLA3	rs738409	n-3 PUFA >250	Fibrosis	361	0.02	CC+high: Improved	GG+high: No improvement	Cross-sect	E. Vilar-Gomez, C. J. Pirola, S. Sookoian, L. A. Wilson, P. Belt, T. Liang, W. Liu and N. Chalasani, Impact of the Association Between PNPLA3 Genetic Variation and Dietary Intake on the Risk of Significant Fibrosis in Patients With NAFLD, Am J Gastroenterol, 2021, 116, 994-1006.
PNPLA3	rs738409	n-3 PUFA >250	NAFLD resolution	361	0.03	CC+high: 59% resolution	GG+high: 31% resolution	Cross-sect	E. Vilar-Gomez, C. J. Pirola, S. Sookoian, L. A. Wilson, P. Belt, T. Liang, W. Liu and N. Chalasani, Impact of the Association Between PNPLA3 Genetic Variation and Dietary Intake on the Risk of Significant Fibrosis in Patients With NAFLD, Am J Gastroenterol, 2021, 116, 994-1006.
PPARA	L162V (rs1800206)	EPA+DHA 2.7g/d	Adiponectin	191	0.06	No significant genotype differences reported	Overall: +7.9% (NS)	Single-arm intervention	A. Binia, C. Vargas-Martínez, M. Ancira-Moreno, L. M. Gosoniu, I. Montoliu, E. Gámez-Valdez, D. C. Soria-Contreras, A. Angeles-Quezada, R. Gonzalez-Alberto, S. Fernández, D. Martínez-Conde, B. Hernández-Morán, M. Ramírez-Solano, C. Pérez-Ortega, Y. Rodríguez-Carmona, I. Castan, I. Rubio-Aliaga, F. Vadillo-Ortega, R. Márquez-Velasco, R. Bojalil, J. C. López-Alvarenga, P. Valet, M. Kussmann, I. Sil…
PPARA	P12A (rs1801282)	EPA+DHA 2.7g/d	Adiponectin	191	0.06	P12P: baseline levels	X12A: +10% (+1.6 μg/mL, P=.06, trend)	Prospective intervention	A. Binia, C. Vargas-Martínez, M. Ancira-Moreno, L. M. Gosoniu, I. Montoliu, E. Gámez-Valdez, D. C. Soria-Contreras, A. Angeles-Quezada, R. Gonzalez-Alberto, S. Fernández, D. Martínez-Conde, B. Hernández-Morán, M. Ramírez-Solano, C. Pérez-Ortega, Y. Rodríguez-Carmona, I. Castan, I. Rubio-Aliaga, F. Vadillo-Ortega, R. Márquez-Velasco, R. Bojalil, J. C. López-Alvarenga, P. Valet, M. Kussmann, I. Sil…
PPARA	L162V (rs1800206)	EPA+DHA 2.7g/d	Apelin	191	0.05	L162L: minimal change	X162V: significant reduction vs L162L (P=.05)	Prospective intervention	A. Binia, C. Vargas-Martínez, M. Ancira-Moreno, L. M. Gosoniu, I. Montoliu, E. Gámez-Valdez, D. C. Soria-Contreras, A. Angeles-Quezada, R. Gonzalez-Alberto, S. Fernández, D. Martínez-Conde, B. Hernández-Morán, M. Ramírez-Solano, C. Pérez-Ortega, Y. Rodríguez-Carmona, I. Castan, I. Rubio-Aliaga, F. Vadillo-Ortega, R. Márquez-Velasco, R. Bojalil, J. C. López-Alvarenga, P. Valet, M. Kussmann, I. Sil…
PPARA	L162V (rs1800206)	EPA+DHA 2.7g/d	C-reactive protein	191	NS	No significant genotype differences reported	Overall: +2.2% (NS)	Single-arm intervention	A. Binia, C. Vargas-Martínez, M. Ancira-Moreno, L. M. Gosoniu, I. Montoliu, E. Gámez-Valdez, D. C. Soria-Contreras, A. Angeles-Quezada, R. Gonzalez-Alberto, S. Fernández, D. Martínez-Conde, B. Hernández-Morán, M. Ramírez-Solano, C. Pérez-Ortega, Y. Rodríguez-Carmona, I. Castan, I. Rubio-Aliaga, F. Vadillo-Ortega, R. Márquez-Velasco, R. Bojalil, J. C. López-Alvarenga, P. Valet, M. Kussmann, I. Sil…
PPARA	L162V (rs1800206)	EPA+DHA 2.7g/d	Fasting glucose	191	NS	No significant genotype differences reported	Overall: +1.2% (NS)	Single-arm intervention	A. Binia, C. Vargas-Martínez, M. Ancira-Moreno, L. M. Gosoniu, I. Montoliu, E. Gámez-Valdez, D. C. Soria-Contreras, A. Angeles-Quezada, R. Gonzalez-Alberto, S. Fernández, D. Martínez-Conde, B. Hernández-Morán, M. Ramírez-Solano, C. Pérez-Ortega, Y. Rodríguez-Carmona, I. Castan, I. Rubio-Aliaga, F. Vadillo-Ortega, R. Márquez-Velasco, R. Bojalil, J. C. López-Alvarenga, P. Valet, M. Kussmann, I. Sil…
PPARA	L162V (rs1800206)	EPA+DHA 2.7g/d	Fasting insulin	191	NS	No significant genotype differences reported	Overall: -6.1% (P=0.034)	Single-arm intervention	A. Binia, C. Vargas-Martínez, M. Ancira-Moreno, L. M. Gosoniu, I. Montoliu, E. Gámez-Valdez, D. C. Soria-Contreras, A. Angeles-Quezada, R. Gonzalez-Alberto, S. Fernández, D. Martínez-Conde, B. Hernández-Morán, M. Ramírez-Solano, C. Pérez-Ortega, Y. Rodríguez-Carmona, I. Castan, I. Rubio-Aliaga, F. Vadillo-Ortega, R. Márquez-Velasco, R. Bojalil, J. C. López-Alvarenga, P. Valet, M. Kussmann, I. Sil…
PPARA	P12A (rs1801282)	EPA+DHA 2.7g/d	Fasting insulin	191	0.032	P12P: -2.5% (-0.1 mIU/L)	X12A: -19.8% (-2.3 mIU/L, P=.032)	Prospective intervention	A. Binia, C. Vargas-Martínez, M. Ancira-Moreno, L. M. Gosoniu, I. Montoliu, E. Gámez-Valdez, D. C. Soria-Contreras, A. Angeles-Quezada, R. Gonzalez-Alberto, S. Fernández, D. Martínez-Conde, B. Hernández-Morán, M. Ramírez-Solano, C. Pérez-Ortega, Y. Rodríguez-Carmona, I. Castan, I. Rubio-Aliaga, F. Vadillo-Ortega, R. Márquez-Velasco, R. Bojalil, J. C. López-Alvarenga, P. Valet, M. Kussmann, I. Sil…
PPARA	L162V (rs1800206)	EPA+DHA 2.7g/d	HDL-cholesterol	191	NS	No significant genotype differences reported	Overall: -0.6% (NS)	Single-arm intervention	A. Binia, C. Vargas-Martínez, M. Ancira-Moreno, L. M. Gosoniu, I. Montoliu, E. Gámez-Valdez, D. C. Soria-Contreras, A. Angeles-Quezada, R. Gonzalez-Alberto, S. Fernández, D. Martínez-Conde, B. Hernández-Morán, M. Ramírez-Solano, C. Pérez-Ortega, Y. Rodríguez-Carmona, I. Castan, I. Rubio-Aliaga, F. Vadillo-Ortega, R. Márquez-Velasco, R. Bojalil, J. C. López-Alvarenga, P. Valet, M. Kussmann, I. Sil…
PPARA	L162V (rs1800206)	EPA+DHA 2.7g/d	HbA1c	191	NS	No significant genotype differences reported	Overall: -1.4% (P<0.001)	Single-arm intervention	A. Binia, C. Vargas-Martínez, M. Ancira-Moreno, L. M. Gosoniu, I. Montoliu, E. Gámez-Valdez, D. C. Soria-Contreras, A. Angeles-Quezada, R. Gonzalez-Alberto, S. Fernández, D. Martínez-Conde, B. Hernández-Morán, M. Ramírez-Solano, C. Pérez-Ortega, Y. Rodríguez-Carmona, I. Castan, I. Rubio-Aliaga, F. Vadillo-Ortega, R. Márquez-Velasco, R. Bojalil, J. C. López-Alvarenga, P. Valet, M. Kussmann, I. Sil…
PPARA	L162V (rs1800206)	EPA+DHA 2.7g/d	Interleukin-6	191	NS	No significant genotype differences reported	Overall: -9.0% (NS)	Single-arm intervention	A. Binia, C. Vargas-Martínez, M. Ancira-Moreno, L. M. Gosoniu, I. Montoliu, E. Gámez-Valdez, D. C. Soria-Contreras, A. Angeles-Quezada, R. Gonzalez-Alberto, S. Fernández, D. Martínez-Conde, B. Hernández-Morán, M. Ramírez-Solano, C. Pérez-Ortega, Y. Rodríguez-Carmona, I. Castan, I. Rubio-Aliaga, F. Vadillo-Ortega, R. Márquez-Velasco, R. Bojalil, J. C. López-Alvarenga, P. Valet, M. Kussmann, I. Sil…
PPARA	L162V (rs1800206)	EPA+DHA 2.7g/d	LDL-cholesterol	191	NS	No significant genotype differences reported	Overall: +1.9% (NS)	Single-arm intervention	A. Binia, C. Vargas-Martínez, M. Ancira-Moreno, L. M. Gosoniu, I. Montoliu, E. Gámez-Valdez, D. C. Soria-Contreras, A. Angeles-Quezada, R. Gonzalez-Alberto, S. Fernández, D. Martínez-Conde, B. Hernández-Morán, M. Ramírez-Solano, C. Pérez-Ortega, Y. Rodríguez-Carmona, I. Castan, I. Rubio-Aliaga, F. Vadillo-Ortega, R. Márquez-Velasco, R. Bojalil, J. C. López-Alvarenga, P. Valet, M. Kussmann, I. Sil…
PPARA	P12A (rs1801282)	EPA+DHA 2.7g/d	LDL-cholesterol (BMI≥25 subgroup)	191 (BMI≥25 analysis)	0.021	P12P: response in BMI≥25	X12A: significant increase vs P12P (P=.021)	Prospective intervention	A. Binia, C. Vargas-Martínez, M. Ancira-Moreno, L. M. Gosoniu, I. Montoliu, E. Gámez-Valdez, D. C. Soria-Contreras, A. Angeles-Quezada, R. Gonzalez-Alberto, S. Fernández, D. Martínez-Conde, B. Hernández-Morán, M. Ramírez-Solano, C. Pérez-Ortega, Y. Rodríguez-Carmona, I. Castan, I. Rubio-Aliaga, F. Vadillo-Ortega, R. Márquez-Velasco, R. Bojalil, J. C. López-Alvarenga, P. Valet, M. Kussmann, I. Sil…
PPARA	L162V (rs1800206)	EPA+DHA 2.7g/d	Total cholesterol	191	NS	No significant genotype differences reported	Overall: +0.5% (NS)	Single-arm intervention	A. Binia, C. Vargas-Martínez, M. Ancira-Moreno, L. M. Gosoniu, I. Montoliu, E. Gámez-Valdez, D. C. Soria-Contreras, A. Angeles-Quezada, R. Gonzalez-Alberto, S. Fernández, D. Martínez-Conde, B. Hernández-Morán, M. Ramírez-Solano, C. Pérez-Ortega, Y. Rodríguez-Carmona, I. Castan, I. Rubio-Aliaga, F. Vadillo-Ortega, R. Márquez-Velasco, R. Bojalil, J. C. López-Alvarenga, P. Valet, M. Kussmann, I. Sil…
PPARA	P12A (rs1801282)	EPA+DHA 2.7g/d	Total cholesterol (BMI≥25 subgroup)	191 (BMI≥25 analysis)	0.032	P12P: response in BMI≥25	X12A: significant increase vs P12P (P=.032)	Prospective intervention	A. Binia, C. Vargas-Martínez, M. Ancira-Moreno, L. M. Gosoniu, I. Montoliu, E. Gámez-Valdez, D. C. Soria-Contreras, A. Angeles-Quezada, R. Gonzalez-Alberto, S. Fernández, D. Martínez-Conde, B. Hernández-Morán, M. Ramírez-Solano, C. Pérez-Ortega, Y. Rodríguez-Carmona, I. Castan, I. Rubio-Aliaga, F. Vadillo-Ortega, R. Márquez-Velasco, R. Bojalil, J. C. López-Alvarenga, P. Valet, M. Kussmann, I. Sil…
PPARA	rs6008259	n-6 PUFA diet	LDL-C change	79	0.050	GG: -0.21±0.05 mmol/L (n=54) \	AA+AG: -0.41±0.08 (n=25)	RCT crossover 4wk	E. Rajendiran, B. Lamarche, Y. She, V. Ramprasath, P. Eck, D. Brassard, I. Gigleux, E. Levy, A. Tremblay, P. Couture, J. D. House, P. J. H. Jones and C. Desmarchelier, A combination of single nucleotide polymorphisms is associated with the interindividual variability in the blood lipid response to dietary fatty acid consumption in a randomized clinical trial, Am J Clin Nutr, 2021, 114, 564-577.
PPARG	Pro12Ala (rs1801282)	DHA 1450mg+EPA 400mg	Adiponectin (μg/ml)	68	0.19	Pro/Pro: -0.4 (DHA) vs +0.4 (placebo), NS	Ala carriers: +0.3 (DHA) vs +0.2 (placebo), NS	RCT 8wk	A. Mansoori, G. Sotoudeh, M. Djalali, M. R. Eshraghian, M. Keramatipour, E. Nasli-Esfahani, F. Shidfar, E. Alvandi, O. Toupchian and F. Koohdani, Docosahexaenoic Acid-Rich Fish Oil Supplementation Improves Body Composition without Influence of the PPARgamma Pro12Ala Polymorphism in Patients with Type 2 Diabetes: A Randomized, Double-Blind, Placebo-Controlled Clinical Trial, J Nutrigenet Nutrigeno…
PPARG	Pro12Ala (rs1801282)	DHA 1450mg+EPA 400mg	BMI	68	0.98	Pro/Pro: -0.1 (DHA) vs +0.1 (placebo)	Ala carriers: 0.0 (DHA) vs +0.2 (placebo)	RCT 8wk	A. Mansoori, G. Sotoudeh, M. Djalali, M. R. Eshraghian, M. Keramatipour, E. Nasli-Esfahani, F. Shidfar, E. Alvandi, O. Toupchian and F. Koohdani, Docosahexaenoic Acid-Rich Fish Oil Supplementation Improves Body Composition without Influence of the PPARgamma Pro12Ala Polymorphism in Patients with Type 2 Diabetes: A Randomized, Double-Blind, Placebo-Controlled Clinical Trial, J Nutrigenet Nutrigeno…
PPARG	Pro12Ala (rs1801282)	DHA 1450mg+EPA 400mg	Body fat (%)	68	0.32	Pro/Pro: +0.1% (DHA) vs +0.5% (placebo), P=0.04	Ala carriers: -0.4% (DHA) vs +1.2% (placebo), P=0.04	RCT 8wk	A. Mansoori, G. Sotoudeh, M. Djalali, M. R. Eshraghian, M. Keramatipour, E. Nasli-Esfahani, F. Shidfar, E. Alvandi, O. Toupchian and F. Koohdani, Docosahexaenoic Acid-Rich Fish Oil Supplementation Improves Body Composition without Influence of the PPARgamma Pro12Ala Polymorphism in Patients with Type 2 Diabetes: A Randomized, Double-Blind, Placebo-Controlled Clinical Trial, J Nutrigenet Nutrigeno…
PPARG	Pro12Ala (rs1801282)	DHA 1450mg+EPA 400mg	Body fat mass (kg)	68	0.39	Pro/Pro: 0.0 kg (DHA) vs +0.6 kg (placebo), P=0.01	Ala carriers: -0.3 kg (DHA) vs +0.8 kg (placebo), P=0.01	RCT 8wk	A. Mansoori, G. Sotoudeh, M. Djalali, M. R. Eshraghian, M. Keramatipour, E. Nasli-Esfahani, F. Shidfar, E. Alvandi, O. Toupchian and F. Koohdani, Docosahexaenoic Acid-Rich Fish Oil Supplementation Improves Body Composition without Influence of the PPARgamma Pro12Ala Polymorphism in Patients with Type 2 Diabetes: A Randomized, Double-Blind, Placebo-Controlled Clinical Trial, J Nutrigenet Nutrigeno…
PPARG	Pro12Ala (rs1801282)	DHA 1450mg+EPA 400mg	Fat-free mass (kg)	68	0.61	Pro/Pro: -0.2 kg (DHA) vs -0.2 kg (placebo), NS	Ala carriers: +0.3 kg (DHA) vs -0.2 kg (placebo), NS	RCT 8wk	A. Mansoori, G. Sotoudeh, M. Djalali, M. R. Eshraghian, M. Keramatipour, E. Nasli-Esfahani, F. Shidfar, E. Alvandi, O. Toupchian and F. Koohdani, Docosahexaenoic Acid-Rich Fish Oil Supplementation Improves Body Composition without Influence of the PPARgamma Pro12Ala Polymorphism in Patients with Type 2 Diabetes: A Randomized, Double-Blind, Placebo-Controlled Clinical Trial, J Nutrigenet Nutrigeno…
PPARG	Pro12Ala (rs1801282)	DHA 1450mg+EPA 400mg	PPARγ gene expression (ΔCt)	68	0.29	Pro/Pro: 0.0 (DHA) vs +0.3 (placebo), NS	Ala carriers: +1.4 (DHA) vs 0.0 (placebo), NS	RCT 8wk	A. Mansoori, G. Sotoudeh, M. Djalali, M. R. Eshraghian, M. Keramatipour, E. Nasli-Esfahani, F. Shidfar, E. Alvandi, O. Toupchian and F. Koohdani, Docosahexaenoic Acid-Rich Fish Oil Supplementation Improves Body Composition without Influence of the PPARgamma Pro12Ala Polymorphism in Patients with Type 2 Diabetes: A Randomized, Double-Blind, Placebo-Controlled Clinical Trial, J Nutrigenet Nutrigeno…
PPARG	Pro12Ala (rs1801282)	DHA 1450mg+EPA 400mg	Trunk fat mass (kg)	68	0.26	Pro/Pro: 0.0 kg (DHA) vs +0.3 kg (placebo), P=0.04	Ala carriers: -0.3 kg (DHA) vs +0.6 kg (placebo), P=0.04	RCT 8wk	A. Mansoori, G. Sotoudeh, M. Djalali, M. R. Eshraghian, M. Keramatipour, E. Nasli-Esfahani, F. Shidfar, E. Alvandi, O. Toupchian and F. Koohdani, Docosahexaenoic Acid-Rich Fish Oil Supplementation Improves Body Composition without Influence of the PPARgamma Pro12Ala Polymorphism in Patients with Type 2 Diabetes: A Randomized, Double-Blind, Placebo-Controlled Clinical Trial, J Nutrigenet Nutrigeno…
PPARG	Pro12Ala (rs1801282)	DHA 1450mg+EPA 400mg	Visceral fat rating	68	0.51	Pro/Pro: 0.0 (DHA) vs +0.2 (placebo), P=0.02	Ala carriers: -0.2 (DHA) vs +0.3 (placebo), P=0.02	RCT 8wk	A. Mansoori, G. Sotoudeh, M. Djalali, M. R. Eshraghian, M. Keramatipour, E. Nasli-Esfahani, F. Shidfar, E. Alvandi, O. Toupchian and F. Koohdani, Docosahexaenoic Acid-Rich Fish Oil Supplementation Improves Body Composition without Influence of the PPARgamma Pro12Ala Polymorphism in Patients with Type 2 Diabetes: A Randomized, Double-Blind, Placebo-Controlled Clinical Trial, J Nutrigenet Nutrigeno…
PPARG	Pro12Ala (rs1801282)	DHA 1450mg+EPA 400mg	Waist circumference (cm)	68	0.43	Pro/Pro: -1.3 cm (DHA) vs +1.3 cm (placebo), P<0.001	Ala carriers: -2.6 cm (DHA) vs +1.3 cm (placebo), P<0.001	RCT 8wk	A. Mansoori, G. Sotoudeh, M. Djalali, M. R. Eshraghian, M. Keramatipour, E. Nasli-Esfahani, F. Shidfar, E. Alvandi, O. Toupchian and F. Koohdani, Docosahexaenoic Acid-Rich Fish Oil Supplementation Improves Body Composition without Influence of the PPARgamma Pro12Ala Polymorphism in Patients with Type 2 Diabetes: A Randomized, Double-Blind, Placebo-Controlled Clinical Trial, J Nutrigenet Nutrigeno…
PPARG	Pro12Ala (rs1801282)	DHA 1450mg+EPA 400mg	Weight (kg)	68	0.94	Pro/Pro: -0.2 kg (DHA) vs +0.2 kg (placebo)	Ala carriers: 0.0 kg (DHA) vs +0.6 kg (placebo)	RCT 8wk	A. Mansoori, G. Sotoudeh, M. Djalali, M. R. Eshraghian, M. Keramatipour, E. Nasli-Esfahani, F. Shidfar, E. Alvandi, O. Toupchian and F. Koohdani, Docosahexaenoic Acid-Rich Fish Oil Supplementation Improves Body Composition without Influence of the PPARgamma Pro12Ala Polymorphism in Patients with Type 2 Diabetes: A Randomized, Double-Blind, Placebo-Controlled Clinical Trial, J Nutrigenet Nutrigeno…
PPARG	Multiple (rs10865710 G, rs7649970 T, rs1801282 G, rs3856806 T)	EPA+DHA 2g/d	HDL-C % change	99	0.21	Any PPARG polymorphism+ω3: +6.7% (95%CI: 2.1% to 11.3%)	No PPARG polymorphism+ω3: +4.4% (95%CI: 0.1% to 8.6%)	RCT 90d	E. Pokushalov, A. Ponomarenko, S. Bayramova, C. Garcia, I. Pak, E. Shrainer, E. Voronina, E. Sokolova, M. Johnson, R. Miller, Evaluating the Impact of Omega-3 Fatty Acid (Soloways) Supplementation on Lipid Profiles in Adults with PPARG Polymorphisms: A Randomized, Double-Blind, Placebo-Controlled Trial, Nutrients 2024, 16, 97
PPARG	Multiple (rs10865710 G, rs7649970 T, rs1801282 G, rs3856806 T)	EPA+DHA 2g/d	LDL-C % change	99	<0.01	Any PPARG polymorphism+ω3: -15.4% (95%CI: -19.8% to -11.0%)	No PPARG polymorphism+ω3: -3.7% (95%CI: -6.9% to -0.6%)	RCT 90d	E. Pokushalov, A. Ponomarenko, S. Bayramova, C. Garcia, I. Pak, E. Shrainer, E. Voronina, E. Sokolova, M. Johnson, R. Miller, Evaluating the Impact of Omega-3 Fatty Acid (Soloways) Supplementation on Lipid Profiles in Adults with PPARG Polymorphisms: A Randomized, Double-Blind, Placebo-Controlled Trial, Nutrients 2024, 16, 97
PPARG	rs1801282	EPA+DHA 2g/d	TG Δ	150	0.038	CC: -0.35 mmol/L	GG: +0.08 mmol/L	RCT 6mo	J. S. Zheng, J. Chen, L. Wang, H. Yang, L. Fang, Y. Yu, L. Yuan, J. Feng, K. Li, J. Tang, M. Lin, C. Q. Lai and D. Li, Replication of a Gene-Diet Interaction at CD36, NOS3 and PPARG in Response to Omega-3 Fatty Acid Supplements on Blood Lipids: A Double-Blind Randomized Controlled Trial, EBioMedicine, 2018, 31, 150-156.; J. S. Zheng, Corrigendum to "Replication of a gene-diet interaction at CD36,…
PPARG	Multiple (rs10865710 G, rs7649970 T, rs1801282 G, rs3856806 T)	EPA+DHA 2g/d	Total cholesterol % change	99	0.23	Any PPARG polymorphism+ω3: -6.2% (95%CI: -10.9% to -1.5%)	No PPARG polymorphism+ω3: -1.4% (95%CI: -3.4% to 0.7%)	RCT 90d	E. Pokushalov, A. Ponomarenko, S. Bayramova, C. Garcia, I. Pak, E. Shrainer, E. Voronina, E. Sokolova, M. Johnson, R. Miller, Evaluating the Impact of Omega-3 Fatty Acid (Soloways) Supplementation on Lipid Profiles in Adults with PPARG Polymorphisms: A Randomized, Double-Blind, Placebo-Controlled Trial, Nutrients 2024, 16, 97
PPARG	Multiple (rs10865710 G, rs7649970 T, rs1801282 G, rs3856806 T)	EPA+DHA 2g/d	Triglycerides % change	99	<0.01	Any PPARG polymorphism+ω3: -21.3% (95%CI: -26.5% to -16.2%)	No PPARG polymorphism+ω3: -8.5% (95%CI: -12.8% to -4.3%)	RCT 90d	E. Pokushalov, A. Ponomarenko, S. Bayramova, C. Garcia, I. Pak, E. Shrainer, E. Voronina, E. Sokolova, M. Johnson, R. Miller, Evaluating the Impact of Omega-3 Fatty Acid (Soloways) Supplementation on Lipid Profiles in Adults with PPARG Polymorphisms: A Randomized, Double-Blind, Placebo-Controlled Trial, Nutrients 2024, 16, 97
PPARG	Multiple (rs10865710 G, rs7649970 T, rs1801282 G, rs3856806 T)	EPA+DHA 2g/d	hsCRP % change	99	0.56	Any PPARG polymorphism+ω3: -5.8% (95%CI: -32.5% to 20.9%)	No PPARG polymorphism+ω3: -2.1% (95%CI: -24.1% to 19.9%)	RCT 90d	E. Pokushalov, A. Ponomarenko, S. Bayramova, C. Garcia, I. Pak, E. Shrainer, E. Voronina, E. Sokolova, M. Johnson, R. Miller, Evaluating the Impact of Omega-3 Fatty Acid (Soloways) Supplementation on Lipid Profiles in Adults with PPARG Polymorphisms: A Randomized, Double-Blind, Placebo-Controlled Trial, Nutrients 2024, 16, 97
PPARG	rs1801282	EPA+DHA 2g/d×ω3	LDL-C Δ	150	0.041	CC+high ω3Δ: -0.41	GG+low ω3Δ: +0.04	RCT 6mo	J. S. Zheng, J. Chen, L. Wang, H. Yang, L. Fang, Y. Yu, L. Yuan, J. Feng, K. Li, J. Tang, M. Lin, C. Q. Lai and D. Li, Replication of a Gene-Diet Interaction at CD36, NOS3 and PPARG in Response to Omega-3 Fatty Acid Supplements on Blood Lipids: A Double-Blind Randomized Controlled Trial, EBioMedicine, 2018, 31, 150-156.; J. S. Zheng, Corrigendum to "Replication of a gene-diet interaction at CD36,…
PPARG	Pro12Ala (rs1801282)	PUFA	BMI (kg/m²)	290	NS	Study text states "no interactions between other fatty acid intakes and this SNP affecting BMI"	Formal interaction test performed but NS; only P-int for PUFA×TG was reported (P=0.01)	Cross-sect	F. Koohdani, G. Sotoudeh, Z. Kalantar and A. Mansoori, PPARgamma Pro12Ala Polymorphism Influences the Relationship between Dietary Fat Intake, Adiposity and Lipid Profile in Patients with Type 2 Diabetes, Int J Vitam Nutr Res, 2018, 88, 263-269.
PPARG	Pro12Ala (rs1801282)	PUFA	Waist circumference (cm)	290	NS	Study text states "no interactions between other fatty acid intakes and this SNP affecting WC"	Formal interaction test performed but NS	Cross-sect	F. Koohdani, G. Sotoudeh, Z. Kalantar and A. Mansoori, PPARgamma Pro12Ala Polymorphism Influences the Relationship between Dietary Fat Intake, Adiposity and Lipid Profile in Patients with Type 2 Diabetes, Int J Vitam Nutr Res, 2018, 88, 263-269.
PPARGC1A	rs11290186	PUFA intake	RMR	288	>0.05	No significant correlation	No genotype×PUFA interaction	Cross-sect	S. Moradi, K. Mirzaei, Z. Maghbooli, A. A. Abdurahman and S. A. Keshavarz, Variants in the PPARGC1A Gene may Influence the Effect of Fat Intake on Resting Metabolic Rate in Obese Women, Lipids, 2018, 53, 291-300.
PPARGC1A	rs2970847	PUFA intake	RMR	276	>0.05	No significant interaction	No difference by genotype	Cross-sect	S. Moradi, K. Mirzaei, Z. Maghbooli, A. A. Abdurahman and S. A. Keshavarz, Variants in the PPARGC1A Gene may Influence the Effect of Fat Intake on Resting Metabolic Rate in Obese Women, Lipids, 2018, 53, 291-300.
PPARγ2	P12A (rs1801282)	EPA+DHA 2.7g/d	C-reactive protein	191	NS	No significant genotype differences reported	Overall: +2.2% (NS)	Single-arm intervention	A. Binia, C. Vargas-Martínez, M. Ancira-Moreno, L. M. Gosoniu, I. Montoliu, E. Gámez-Valdez, D. C. Soria-Contreras, A. Angeles-Quezada, R. Gonzalez-Alberto, S. Fernández, D. Martínez-Conde, B. Hernández-Morán, M. Ramírez-Solano, C. Pérez-Ortega, Y. Rodríguez-Carmona, I. Castan, I. Rubio-Aliaga, F. Vadillo-Ortega, R. Márquez-Velasco, R. Bojalil, J. C. López-Alvarenga, P. Valet, M. Kussmann, I. Sil…
PPARγ2	P12A (rs1801282)	EPA+DHA 2.7g/d	Fasting glucose	191	NS	No significant genotype differences reported	Overall: +1.2% (NS)	Single-arm intervention	A. Binia, C. Vargas-Martínez, M. Ancira-Moreno, L. M. Gosoniu, I. Montoliu, E. Gámez-Valdez, D. C. Soria-Contreras, A. Angeles-Quezada, R. Gonzalez-Alberto, S. Fernández, D. Martínez-Conde, B. Hernández-Morán, M. Ramírez-Solano, C. Pérez-Ortega, Y. Rodríguez-Carmona, I. Castan, I. Rubio-Aliaga, F. Vadillo-Ortega, R. Márquez-Velasco, R. Bojalil, J. C. López-Alvarenga, P. Valet, M. Kussmann, I. Sil…
PPARγ2	P12A (rs1801282)	EPA+DHA 2.7g/d	HDL-cholesterol	191	NS	No significant genotype differences reported	Overall: -0.6% (NS)	Single-arm intervention	A. Binia, C. Vargas-Martínez, M. Ancira-Moreno, L. M. Gosoniu, I. Montoliu, E. Gámez-Valdez, D. C. Soria-Contreras, A. Angeles-Quezada, R. Gonzalez-Alberto, S. Fernández, D. Martínez-Conde, B. Hernández-Morán, M. Ramírez-Solano, C. Pérez-Ortega, Y. Rodríguez-Carmona, I. Castan, I. Rubio-Aliaga, F. Vadillo-Ortega, R. Márquez-Velasco, R. Bojalil, J. C. López-Alvarenga, P. Valet, M. Kussmann, I. Sil…
PPARγ2	P12A (rs1801282)	EPA+DHA 2.7g/d	HbA1c	191	NS	No significant genotype differences reported	Overall: -1.4% (P<0.001)	Single-arm intervention	A. Binia, C. Vargas-Martínez, M. Ancira-Moreno, L. M. Gosoniu, I. Montoliu, E. Gámez-Valdez, D. C. Soria-Contreras, A. Angeles-Quezada, R. Gonzalez-Alberto, S. Fernández, D. Martínez-Conde, B. Hernández-Morán, M. Ramírez-Solano, C. Pérez-Ortega, Y. Rodríguez-Carmona, I. Castan, I. Rubio-Aliaga, F. Vadillo-Ortega, R. Márquez-Velasco, R. Bojalil, J. C. López-Alvarenga, P. Valet, M. Kussmann, I. Sil…
PPARγ2	P12A (rs1801282)	EPA+DHA 2.7g/d	Interleukin-6	191	NS	No significant genotype differences reported	Overall: -9.0% (NS)	Single-arm intervention	A. Binia, C. Vargas-Martínez, M. Ancira-Moreno, L. M. Gosoniu, I. Montoliu, E. Gámez-Valdez, D. C. Soria-Contreras, A. Angeles-Quezada, R. Gonzalez-Alberto, S. Fernández, D. Martínez-Conde, B. Hernández-Morán, M. Ramírez-Solano, C. Pérez-Ortega, Y. Rodríguez-Carmona, I. Castan, I. Rubio-Aliaga, F. Vadillo-Ortega, R. Márquez-Velasco, R. Bojalil, J. C. López-Alvarenga, P. Valet, M. Kussmann, I. Sil…
PPARγ2	P12A (rs1801282)	EPA+DHA 2.7g/d	LDL-cholesterol (overall)	191	0.021	No significant genotype differences in overall sample	Overall: +1.9% (NS)	Single-arm intervention	A. Binia, C. Vargas-Martínez, M. Ancira-Moreno, L. M. Gosoniu, I. Montoliu, E. Gámez-Valdez, D. C. Soria-Contreras, A. Angeles-Quezada, R. Gonzalez-Alberto, S. Fernández, D. Martínez-Conde, B. Hernández-Morán, M. Ramírez-Solano, C. Pérez-Ortega, Y. Rodríguez-Carmona, I. Castan, I. Rubio-Aliaga, F. Vadillo-Ortega, R. Márquez-Velasco, R. Bojalil, J. C. López-Alvarenga, P. Valet, M. Kussmann, I. Sil…
PPARγ2	P12A (rs1801282)	EPA+DHA 2.7g/d	Total cholesterol (overall)	191	0.032	No significant genotype differences in overall sample	Overall: +0.5% (NS)	Single-arm intervention	A. Binia, C. Vargas-Martínez, M. Ancira-Moreno, L. M. Gosoniu, I. Montoliu, E. Gámez-Valdez, D. C. Soria-Contreras, A. Angeles-Quezada, R. Gonzalez-Alberto, S. Fernández, D. Martínez-Conde, B. Hernández-Morán, M. Ramírez-Solano, C. Pérez-Ortega, Y. Rodríguez-Carmona, I. Castan, I. Rubio-Aliaga, F. Vadillo-Ortega, R. Márquez-Velasco, R. Bojalil, J. C. López-Alvarenga, P. Valet, M. Kussmann, I. Sil…
PPARγ2	Pro12Ala	PUFA-%energy	Dyslipidemia (LDL)	271	0.0208	Ala12/X dyslip: 5.29±1.71% (LOWER)	Ala12/X normo: 6.24±1.43% (HIGHER, protective)	Cross-sect	B. Grygiel-Gorniak, E. Kaczmarek, M. Mosor, J. Przyslawski and J. Nowak, The Gene-Diet Associations in Postmenopausal Women with Newly Diagnosed Dyslipidemia, J Nutr Health Aging, 2017, 21, 1031-1037.
PPARγ2	Pro12Ala	PUFA-%energy (normo only)	Waist circumference	271	0.04028	Ala12/X: 6.24±1.43% PUFA, WC 94.3 cm	Pro12Pro: 6.02±1.92% PUFA, WC 86.2 cm	Cross-sect	B. Grygiel-Gorniak, E. Kaczmarek, M. Mosor, J. Przyslawski and J. Nowak, The Gene-Diet Associations in Postmenopausal Women with Newly Diagnosed Dyslipidemia, J Nutr Health Aging, 2017, 21, 1031-1037.
PRS	21 AD SNPs	Non-DHA omega-3	Atopic dermatitis	250040	>0.05	Low PRS Q4: HR 0.62 (0.53-0.72)	High PRS Q4: HR 0.76 (0.65-0.90)	Cohort 14.4y	R. Mao, X. Meng, T. Zhang, F. Wang, Y. Zhong and J. Li, Evaluating the Impact of Omega-3 Fatty Acids and Genetic Susceptibility on Atopic Dermatitis in Adults, Mol Nutr Food Res, 2025, 69, e70002.
PRS	21 AD SNPs	Omega-6/omega-3 ratio	Atopic dermatitis	250040	>0.05	Low PRS Q1: HR 0.68 (0.58-0.79)	High PRS Q4: HR 1.0 (ref)	Cohort 14.4y	R. Mao, X. Meng, T. Zhang, F. Wang, Y. Zhong and J. Li, Evaluating the Impact of Omega-3 Fatty Acids and Genetic Susceptibility on Atopic Dermatitis in Adults, Mol Nutr Food Res, 2025, 69, e70002.
PRS	21 AD SNPs	Plasma omega-3	Atopic dermatitis	250040	>0.05	Low PRS Q4: HR 0.62 (0.53-0.72)	High PRS Q4: HR 0.73 (0.62-0.86)	Cohort 14.4y	R. Mao, X. Meng, T. Zhang, F. Wang, Y. Zhong and J. Li, Evaluating the Impact of Omega-3 Fatty Acids and Genetic Susceptibility on Atopic Dermatitis in Adults, Mol Nutr Food Res, 2025, 69, e70002.
RETN	rs1862513	n-3 PUFA	Resistin	1981	0.001	GG: 18.9→14.5 (-23%)	CC: 9.5→8.8 (-7%)	Cross-sect	Y. Noumi, R. Kawamura, Y. Tabara, K. Maruyama, Y. Takata, W. Nishida, A. Okamoto, T. Nishimiya, H. Onuma, I. Saito, T. Tanigawa and H. Osawa, An inverse association between serum resistin levels and n-3 polyunsaturated fatty acids intake was strongest in the SNP-420 G/G genotype in the Japanese cohort: The Toon Genome Study, Clin Endocrinol (Oxf), 2018, 88, 51-57.
RGMA	rs17526269	RBC ALA	TMT A	1620	7.9e-06	β interaction = 0.07	See Table 4 in Annevelink et al. 2024 for detailed effects by genotype	Cross-sect	C. E. Annevelink, J. Westra, A. Sala-Vila, W. S. Harris, N. L. Tintle and G. C. Shearer, A Genome-Wide Interaction Study of Erythrocyte omega-3 Polyunsaturated Fatty Acid Species and Memory in the Framingham Heart Study Offspring Cohort, J Nutr, 2024, 154, 1640-1651.
SBSPON	rs1007750	n-3 (δ¹⁵N)	Thigh circumference	982	0.217	Borderline interaction (P=0.03)	Authors did not report as significant; Main effect P=0.0005	Cross-sect	L. K. Vaughan, H. W. Wiener, S. Aslibekyan, D. B. Allison, P. J. Havel, K. L. Stanhope, D. M. O'Brien, S. E. Hopkins, D. J. Lemas, B. B. Boyer and H. K. Tiwari, Linkage and association analysis of obesity traits reveals novel loci and interactions with dietary n-3 fatty acids in an Alaska Native (Yup'ik) population, Metabolism, 2015, 64, 689-697.
SERINC5	rs41539351	RBC DHA	TMT B	1620	4.5e-06	β interaction = -0.46	See Table 4 in Annevelink et al. 2024 for detailed effects by genotype	Cross-sect	C. E. Annevelink, J. Westra, A. Sala-Vila, W. S. Harris, N. L. Tintle and G. C. Shearer, A Genome-Wide Interaction Study of Erythrocyte omega-3 Polyunsaturated Fatty Acid Species and Memory in the Framingham Heart Study Offspring Cohort, J Nutr, 2024, 154, 1640-1651.
SERINC5	rs41539351	RBC Omega-3 Index (EPA+DHA)	TMT B	1620	5e-06	β interaction = -0.44	See Table 4 in Annevelink et al. 2024 for detailed effects by genotype	Cross-sect	C. E. Annevelink, J. Westra, A. Sala-Vila, W. S. Harris, N. L. Tintle and G. C. Shearer, A Genome-Wide Interaction Study of Erythrocyte omega-3 Polyunsaturated Fatty Acid Species and Memory in the Framingham Heart Study Offspring Cohort, J Nutr, 2024, 154, 1640-1651.
SIDT2	rs17120425	Total PUFA	HDL-C	616	0.039	A: +18 mg/dL (high)	WT: No effect	Cross-sect	G. Leon-Reyes, A. D. Argoty-Pantoja, B. Rivera-Paredez, A. Hidalgo-Bravo, Y. N. Flores, J. Salmeron and R. Velazquez-Cruz, Interaction between SIDT2 and ABCA1 Variants with Nutrients on HDL-c Levels in Mexican Adults, Nutrients, 2023, 15.
SORBS1	rs11188349	RBC DHA	TMT A	1620	3.4e-06	β interaction = -0.15	See Table 4 in Annevelink et al. 2024 for detailed effects by genotype	Cross-sect	C. E. Annevelink, J. Westra, A. Sala-Vila, W. S. Harris, N. L. Tintle and G. C. Shearer, A Genome-Wide Interaction Study of Erythrocyte omega-3 Polyunsaturated Fatty Acid Species and Memory in the Framingham Heart Study Offspring Cohort, J Nutr, 2024, 154, 1640-1651.
SORBS1	rs11188349	RBC Omega-3 Index (EPA+DHA)	TMT A	1620	8.6e-06	β interaction = -0.14	See Table 4 in Annevelink et al. 2024 for detailed effects by genotype	Cross-sect	C. E. Annevelink, J. Westra, A. Sala-Vila, W. S. Harris, N. L. Tintle and G. C. Shearer, A Genome-Wide Interaction Study of Erythrocyte omega-3 Polyunsaturated Fatty Acid Species and Memory in the Framingham Heart Study Offspring Cohort, J Nutr, 2024, 154, 1640-1651.
SORCS2	rs3857194	RBC DHA	TMT D	1620	6.7e-06	β interaction = 0.33	See Table 4 in Annevelink et al. 2024 for detailed effects by genotype	Cross-sect	C. E. Annevelink, J. Westra, A. Sala-Vila, W. S. Harris, N. L. Tintle and G. C. Shearer, A Genome-Wide Interaction Study of Erythrocyte omega-3 Polyunsaturated Fatty Acid Species and Memory in the Framingham Heart Study Offspring Cohort, J Nutr, 2024, 154, 1640-1651.
SORCS2	rs3857194	RBC Omega-3 Index (EPA+DHA)	TMT D	1620	3.6e-06	β interaction = 0.33	See Table 4 in Annevelink et al. 2024 for detailed effects by genotype	Cross-sect	C. E. Annevelink, J. Westra, A. Sala-Vila, W. S. Harris, N. L. Tintle and G. C. Shearer, A Genome-Wide Interaction Study of Erythrocyte omega-3 Polyunsaturated Fatty Acid Species and Memory in the Framingham Heart Study Offspring Cohort, J Nutr, 2024, 154, 1640-1651.
SPATA13	rs17462267	RBC DHA	TMT A	1620	4.5e-06	β interaction = 0.12	See Table 4 in Annevelink et al. 2024 for detailed effects by genotype	Cross-sect	C. E. Annevelink, J. Westra, A. Sala-Vila, W. S. Harris, N. L. Tintle and G. C. Shearer, A Genome-Wide Interaction Study of Erythrocyte omega-3 Polyunsaturated Fatty Acid Species and Memory in the Framingham Heart Study Offspring Cohort, J Nutr, 2024, 154, 1640-1651.
STEAP2	rs194507	RBC DHA	TMT B	1620	6.2e-06	β interaction = 0.37	See Table 4 in Annevelink et al. 2024 for detailed effects by genotype	Cross-sect	C. E. Annevelink, J. Westra, A. Sala-Vila, W. S. Harris, N. L. Tintle and G. C. Shearer, A Genome-Wide Interaction Study of Erythrocyte omega-3 Polyunsaturated Fatty Acid Species and Memory in the Framingham Heart Study Offspring Cohort, J Nutr, 2024, 154, 1640-1651.
STEAP2	rs194507	RBC Omega-3 Index (EPA+DHA)	TMT B	1620	7.1e-06	β interaction = 0.35	See Table 4 in Annevelink et al. 2024 for detailed effects by genotype	Cross-sect	C. E. Annevelink, J. Westra, A. Sala-Vila, W. S. Harris, N. L. Tintle and G. C. Shearer, A Genome-Wide Interaction Study of Erythrocyte omega-3 Polyunsaturated Fatty Acid Species and Memory in the Framingham Heart Study Offspring Cohort, J Nutr, 2024, 154, 1640-1651.
SUGCT	rs7786908	RBC DHA	TMT B	1620	3e-08	β interaction = 0.95	See Table 4 in Annevelink et al. 2024 for detailed effects by genotype	Cross-sect	C. E. Annevelink, J. Westra, A. Sala-Vila, W. S. Harris, N. L. Tintle and G. C. Shearer, A Genome-Wide Interaction Study of Erythrocyte omega-3 Polyunsaturated Fatty Acid Species and Memory in the Framingham Heart Study Offspring Cohort, J Nutr, 2024, 154, 1640-1651.
SUGCT	rs7786908	RBC DHA	TMT D	1620	1.1e-06	β interaction = 0.74	See Table 4 in Annevelink et al. 2024 for detailed effects by genotype	Cross-sect	C. E. Annevelink, J. Westra, A. Sala-Vila, W. S. Harris, N. L. Tintle and G. C. Shearer, A Genome-Wide Interaction Study of Erythrocyte omega-3 Polyunsaturated Fatty Acid Species and Memory in the Framingham Heart Study Offspring Cohort, J Nutr, 2024, 154, 1640-1651.
SUGCT	rs7786908	RBC Omega-3 Index (EPA+DHA)	TMT B	1620	9.9e-08	β interaction = 0.88	See Table 4 in Annevelink et al. 2024 for detailed effects by genotype	Cross-sect	C. E. Annevelink, J. Westra, A. Sala-Vila, W. S. Harris, N. L. Tintle and G. C. Shearer, A Genome-Wide Interaction Study of Erythrocyte omega-3 Polyunsaturated Fatty Acid Species and Memory in the Framingham Heart Study Offspring Cohort, J Nutr, 2024, 154, 1640-1651.
SUGCT	rs7786908	RBC Omega-3 Index (EPA+DHA)	TMT D	1620	2.4e-06	β interaction = 0.68	See Table 4 in Annevelink et al. 2024 for detailed effects by genotype	Cross-sect	C. E. Annevelink, J. Westra, A. Sala-Vila, W. S. Harris, N. L. Tintle and G. C. Shearer, A Genome-Wide Interaction Study of Erythrocyte omega-3 Polyunsaturated Fatty Acid Species and Memory in the Framingham Heart Study Offspring Cohort, J Nutr, 2024, 154, 1640-1651.
TCF7L2	rs12255372	PUFA	HDL-C	1682	<0.0001	T allele carriers: +1.96 (low PUFA)	T allele carriers: -1.64 (high PUFA)	Cross-sect	D. Bodhini, S. Gaal, I. Shatwan, K. Ramya, B. Ellahi, S. Surendran, V. Sudha, M. R. Anjana, V. Mohan, J. A. Lovegrove, V. Radha and K. S. Vimaleswaran, Interaction between TCF7L2 polymorphism and dietary fat intake on high density lipoprotein cholesterol, PLoS One, 2017, 12, e0188382.
TCF7L2	rs7903146	Total PUFA (≥7.36% energy)	Postprandial chylomicrons	1011	0.025	CT+TT + high PUFA: higher chylomicrons (P=0.006)	CT+TT + low PUFA: no difference vs CC	Cross-sect (postprandial challenge)	D. Warodomwichit, D. K. Arnett, E. K. Kabagambe, M. Y. Tsai, J. E. Hixson, R. J. Straka, M. Province, P. An, C. Q. Lai, I. Borecki and J. M. Ordovas, Polyunsaturated fatty acids modulate the effect of TCF7L2 gene variants on postprandial lipemia, J Nutr, 2009, 139, 439-446.
TCF7L2	rs7903146	Total PUFA (≥7.36% energy)	Postprandial large VLDL	1011	0.018	CT+TT + high PUFA: higher large VLDL (P=0.009)	CT+TT + low PUFA: no difference vs CC	Cross-sect (postprandial challenge)	D. Warodomwichit, D. K. Arnett, E. K. Kabagambe, M. Y. Tsai, J. E. Hixson, R. J. Straka, M. Province, P. An, C. Q. Lai, I. Borecki and J. M. Ordovas, Polyunsaturated fatty acids modulate the effect of TCF7L2 gene variants on postprandial lipemia, J Nutr, 2009, 139, 439-446.
TCF7L2	rs7903146	n-3 PUFA	Postprandial TG	1011	NS	No significant interaction	No significant interaction	Cross-sect (postprandial challenge)	D. Warodomwichit, D. K. Arnett, E. K. Kabagambe, M. Y. Tsai, J. E. Hixson, R. J. Straka, M. Province, P. An, C. Q. Lai, I. Borecki and J. M. Ordovas, Polyunsaturated fatty acids modulate the effect of TCF7L2 gene variants on postprandial lipemia, J Nutr, 2009, 139, 439-446.
TCF7L2	rs7903146	n-6 PUFA (≥6.62% energy)	Fasting VLDL particles	1083	0.012	CT+TT + high n-6 PUFA: higher VLDL (P=0.011)	CT+TT + low n-6 PUFA: no difference vs CC	Cross-sect	D. Warodomwichit, D. K. Arnett, E. K. Kabagambe, M. Y. Tsai, J. E. Hixson, R. J. Straka, M. Province, P. An, C. Q. Lai, I. Borecki and J. M. Ordovas, Polyunsaturated fatty acids modulate the effect of TCF7L2 gene variants on postprandial lipemia, J Nutr, 2009, 139, 439-446.
TCF7L2	rs7903146	n-6 PUFA (≥6.62% energy)	Postprandial TG (AUC)	1011	0.021	CT+TT + high n-6 PUFA: higher postprandial TG (P=0.008)	CT+TT + low n-6 PUFA: no difference vs CC	Cross-sect (postprandial challenge)	D. Warodomwichit, D. K. Arnett, E. K. Kabagambe, M. Y. Tsai, J. E. Hixson, R. J. Straka, M. Province, P. An, C. Q. Lai, I. Borecki and J. M. Ordovas, Polyunsaturated fatty acids modulate the effect of TCF7L2 gene variants on postprandial lipemia, J Nutr, 2009, 139, 439-446.
TLR4	rs11536889	AA (arachidonic acid)	Inflammatory cluster	262	0.232	GG+high AA: OR=0.48 (0.26-0.87)	GC+CC+high AA: OR=1.75 (0.35-8.8)	Cross-sect	M. M. Norde, E. Oki, A. A. F. Carioca, I. A. Castro, J. M. P. Souza, D. M. L. Marchioni, R. M. Fisberg and M. M. Rogero, Influence of toll-like receptor 4 gene variants and plasma fatty acid profile on systemic inflammation: A population-based cross-sectional study, Nutrition, 2017, 35, 106-111.
TLR4	rs11536889	AA/EPA ratio	Inflammatory cluster	262	0.034	GG+high AA/EPA: OR=0.89 (0.48-1.66)	GC+CC+high AA/EPA: OR=5.96 (1.02-34.68)	Cross-sect	M. M. Norde, E. Oki, A. A. F. Carioca, I. A. Castro, J. M. P. Souza, D. M. L. Marchioni, R. M. Fisberg and M. M. Rogero, Influence of toll-like receptor 4 gene variants and plasma fatty acid profile on systemic inflammation: A population-based cross-sectional study, Nutrition, 2017, 35, 106-111.
TLR4	rs5030728	DHA	Inflammatory cluster	262	0.085	GG+high DHA: OR=1.16 (0.47-2.82)	GA+AA+high DHA: OR=0.36 (0.16-0.79)	Cross-sect	M. M. Norde, E. Oki, A. A. F. Carioca, I. A. Castro, J. M. P. Souza, D. M. L. Marchioni, R. M. Fisberg and M. M. Rogero, Influence of toll-like receptor 4 gene variants and plasma fatty acid profile on systemic inflammation: A population-based cross-sectional study, Nutrition, 2017, 35, 106-111.
TLR4	rs11536889	DHA	Inflammatory cluster	262	0.311	GG+high DHA: OR=0.52 (0.28-0.96)	GC+CC+high DHA: OR=1.47 (0.3-7.25)	Cross-sect	M. M. Norde, E. Oki, A. A. F. Carioca, I. A. Castro, J. M. P. Souza, D. M. L. Marchioni, R. M. Fisberg and M. M. Rogero, Influence of toll-like receptor 4 gene variants and plasma fatty acid profile on systemic inflammation: A population-based cross-sectional study, Nutrition, 2017, 35, 106-111.
TLR4	rs5030728	n-3 HUFA	Inflammatory cluster	262	0.13	GG+high n-3 HUFA: OR=0.97 (0.4-2.35)	GA+AA+high n-3 HUFA: OR=0.44 (0.21-0.95)	Cross-sect	M. M. Norde, E. Oki, A. A. F. Carioca, I. A. Castro, J. M. P. Souza, D. M. L. Marchioni, R. M. Fisberg and M. M. Rogero, Influence of toll-like receptor 4 gene variants and plasma fatty acid profile on systemic inflammation: A population-based cross-sectional study, Nutrition, 2017, 35, 106-111.
TLR4	rs5030728	n-3 PUFA	Inflammatory cluster	262	0.653	GG+high n-3: OR=0.52 (0.22-1.26)	GA+AA+high n-3: OR=0.45 (0.21-0.96)	Cross-sect	M. M. Norde, E. Oki, A. A. F. Carioca, I. A. Castro, J. M. P. Souza, D. M. L. Marchioni, R. M. Fisberg and M. M. Rogero, Influence of toll-like receptor 4 gene variants and plasma fatty acid profile on systemic inflammation: A population-based cross-sectional study, Nutrition, 2017, 35, 106-111.
TLR4	rs11536889	n-3 PUFA	Inflammatory cluster	262	0.433	GG+high n-3: OR=0.54 (0.29-0.99)	GC+CC+high n-3: OR=0.19 (0.03-1.45)	Cross-sect	M. M. Norde, E. Oki, A. A. F. Carioca, I. A. Castro, J. M. P. Souza, D. M. L. Marchioni, R. M. Fisberg and M. M. Rogero, Influence of toll-like receptor 4 gene variants and plasma fatty acid profile on systemic inflammation: A population-based cross-sectional study, Nutrition, 2017, 35, 106-111.
TNF	rs1799724 (-857C/T)	ALA (α-linolenic acid)	Inflammatory cluster	281	0.026	CC: decreasing OR with ↑ALA	CT+TT: OR=4.29 (1.25-14.78) with ↑ALA	Cross-sect	E. Oki, M. N. Norde, A. A. F. Carioca, J. M. P. Souza, I. A. Castro, D. M. L. Marchioni, R. M. Fisberg and M. M. Rogero, Polymorphisms of the TNF-alpha gene interact with plasma fatty acids on inflammatory biomarker profile: a population-based, cross-sectional study in Sao Paulo, Brazil, Br J Nutr, 2017, 117, 1663-1673.
TNF	rs1800629 (-308G/A)	Stearic acid (C18:0)	Inflammatory cluster	281	0.044	GG: OR=0.80 (95% CI 0.66-0.98), decreasing OR with ↑stearic acid	GA+AA: increasing OR with ↑stearic acid	Cross-sect	E. Oki, M. N. Norde, A. A. F. Carioca, J. M. P. Souza, I. A. Castro, D. M. L. Marchioni, R. M. Fisberg and M. M. Rogero, Polymorphisms of the TNF-alpha gene interact with plasma fatty acids on inflammatory biomarker profile: a population-based, cross-sectional study in Sao Paulo, Brazil, Br J Nutr, 2017, 117, 1663-1673.
TNF	rs1800629 (-308G/A)	Total SFA	Inflammatory cluster	281	0.040	GG: decreasing OR with ↑total SFA	GA+AA: OR=1.32 (95% CI 1.02-1.71) with ↑total SFA	Cross-sect	E. Oki, M. N. Norde, A. A. F. Carioca, J. M. P. Souza, I. A. Castro, D. M. L. Marchioni, R. M. Fisberg and M. M. Rogero, Polymorphisms of the TNF-alpha gene interact with plasma fatty acids on inflammatory biomarker profile: a population-based, cross-sectional study in Sao Paulo, Brazil, Br J Nutr, 2017, 117, 1663-1673.
Undetermined	rs2048417	n-3 (δ¹⁵N)	Adiponectin	982	0.0006	AA: 2.5 (Q4) [↑0.2 from Q1]	GG: 2.2 (Q4) [↓0.1 from Q1]	Cross-sect	L. K. Vaughan, H. W. Wiener, S. Aslibekyan, D. B. Allison, P. J. Havel, K. L. Stanhope, D. M. O'Brien, S. E. Hopkins, D. J. Lemas, B. B. Boyer and H. K. Tiwari, Linkage and association analysis of obesity traits reveals novel loci and interactions with dietary n-3 fatty acids in an Alaska Native (Yup'ik) population, Metabolism, 2015, 64, 689-697.
3-SNP hap	Multiple	PUFA	Low HDL-C	8839	0.016	Minor+High: OR=2.09	Minor+Low: OR=0.96	Cross-sect	M. Liu, H. S. Jin and S. Park, Protein and fat intake interacts with the haplotype of PTPN11_rs11066325, RPH3A_rs886477, and OAS3_rs2072134 to modulate serum HDL concentrations in middle-aged people, Clin Nutr, 2020, 39, 942-949.
5-SNP PRS	Multiple	ω-3 FA (% kcal)	COPD risk	884	0.0183	High-PRS+Low: OR=2.29	High-PRS+High: OR=1.45	Cross-sect	K. S. Kim and S. Park, Impact of Lung-Related Polygenic Risk Scores on Chronic Obstructive Pulmonary Disease Risk and Their Interaction with w-3 Fatty Acid Intake in Middle-Aged and Elderly Individuals, Nutrients, 2023, 15.
